# Supplementary material for: Nuclear receptor NR4A is required for patterning at the ends of the planarian anterior-posterior axis
Source: eLife. 2019 Apr 26;8:e42015. doi: 10.7554/eLife.42015 (PMC6534381; doi:10.7554/eLife.42015)
Supplement: Figure 4—source data 1. [file elife-42015-fig4-data1.xlsx]

## Sheet: Fig4-source data 1
Figure 4-source data 1. Quantification of proportion of collagen+ muscle cells that express nr4A in head, pre-pharynx, and tail of uninjured animals.
Quantification volume:
200um x 200um area through a 15um stack
Animal	# collagen+ cells	# collagen+; nr4A+ cells	proportion collagen+; nr4A+		Location	Avg proportion collagen+; nr4A+ cells	SD
head_1_nr4A(rhod)_collagen(FITC)_DAPI_2.lsm	227	192	0.845815		Head	0.814636	0.051812
head_2_nr4A(rhod)_collagen(FITC)_DAPI.lsm	211	176	0.834123		Prepharynx	0.672089	0.11053
head_3_nr4A(rhod)_collagen(FITC)_DAPI.lsm	255	213	0.835294		Tail	0.790477	0.0599332
head_4_nr4A(rhod)_collagen(FITC)_DAPI.lsm	301	248	0.82392
head_5_nr4A(rhod)_collagen(FITC)_DAPI.lsm	270	218	0.807407
head_6_nr4A(rhod)_collagen(FITC)_DAPI.lsm	237	189	0.797468
head_7_nr4A(rhod)_collagen(FITC)_DAPI.lsm	295	251	0.850847
head_8_nr4A(rhod)_collagen(FITC)_DAPI.lsm	175	120	0.685714
head_9_nr4A(rhod)_collagen(FITC)_DAPI.lsm	309	263	0.851133
prepharyx_1_nr4A(rhod)_collagen(FITC)_DAPI.lsm	190	136	0.715789
prepharyx_2_nr4A(rhod)_collagen(FITC)_DAPI.lsm	165	107	0.648485
prepharyx_3_nr4A(rhod)_collagen(FITC)_DAPI.lsm	138	71	0.514493
prepharyx_4_nr4A(rhod)_collagen(FITC)_DAPI.lsm	181	119	0.657459
prepharyx_5_nr4A(rhod)_collagen(FITC)_DAPI.lsm	178	100	0.561798
prepharyx_6_nr4A(rhod)_collagen(FITC)_DAPI.lsm	103	77	0.747573
prepharyx_7_nr4A(rhod)_collagen(FITC)_DAPI.lsm	165	118	0.715152
prepharyx_8_nr4A(rhod)_collagen(FITC)_DAPI.lsm	171	103	0.602339
prepharyx_9_nr4A(rhod)_collagen(FITC)_DAPI.lsm	210	186	0.885714
tail_1_nr4A(rhod)_collagen(FITC)_DAPI.lsm	220	176	0.8
tail_2_nr4A(rhod)_collagen(FITC)_DAPI.lsm	196	161	0.821429
tail_3_nr4A(rhod)_collagen(FITC)_DAPI.lsm	251	199	0.792829
tail_4_nr4A(rhod)_collagen(FITC)_DAPI.lsm	216	153	0.708333
tail_5_nr4A(rhod)_collagen(FITC)_DAPI.lsm	225	187	0.831111
tail_6_nr4A(rhod)_collagen(FITC)_DAPI.lsm	241	191	0.792531
tail_7_nr4A(rhod)_collagen(FITC)_DAPI.lsm	257	178	0.692607
tail_8_nr4A(rhod)_collagen(FITC)_DAPI.lsm	253	199	0.786561
tail_9_nr4A(rhod)_collagen(FITC)_DAPI.lsm	198	176	0.888889
