# Supplementary material for: Nuclear receptor NR4A is required for patterning at the ends of the planarian anterior-posterior axis
Source: eLife. 2019 Apr 26;8:e42015. doi: 10.7554/eLife.42015 (PMC6534381; doi:10.7554/eLife.42015)
Supplement: Figure 6—figure supplement 1—source data 1. [file elife-42015-fig6-figsupp1-data1.xlsx]

## Sheet: Fig6FS1-source data 1
Figure 6-figure supplement 1-source data 1. Muscle fiber quantifications at 4 weeks of RNAi.
Animal	# circ fibers/100um	Animal	# long fibers/100um
nr4A_RNAi_RNAi_4weeks_head_ventral.lsm	37	nr4A_RNAi_4weeks_head_ventral.lsm	27
nr4A_RNAi_RNAi_4weeks_head2_ventral.lsm	35	nr4A_RNAi_4weeks_head2_ventral.lsm	30
nr4A_RNAi_RNAi_4weeks_head3_ventral.lsm	40	nr4A_RNAi_4weeks_head3_ventral.lsm	34
nr4A_RNAi_RNAi_4weeks_head4_ventral.lsm	35	nr4A_RNAi_4weeks_head4_ventral.lsm	31
nr4A_RNAi_RNAi_4weeks_head5_ventral.lsm	32	nr4A_RNAi_4weeks_head5_ventral.lsm	30
nr4A_RNAi_RNAi_4weeks_head6_ventral.lsm	41	nr4A_RNAi_4weeks_head6_ventral.lsm	32
unc_RNAi_4weeks_head_ventral.lsm	38	unc_RNAi_4weeks_head_ventral.lsm	29
unc_RNAi_4weeks_head2_ventral.lsm	41	unc_RNAi_4weeks_head2_ventral.lsm	32
unc_RNAi_4weeks_head3_ventral.lsm	37	unc_RNAi_4weeks_head3_ventral.lsm	32
unc_RNAi_4weeks_head4_ventral.lsm	40	unc_RNAi_4weeks_head4_ventral.lsm	31
unc_RNAi_4weeks_head5_ventral.lsm	37	unc_RNAi_4weeks_head5_ventral.lsm	31
unc_RNAi_4weeks_head6_ventral.lsm	35	unc_RNAi_4weeks_head6_ventral.lsm	36
