# Supplementary material for: Nuclear receptor NR4A is required for patterning at the ends of the planarian anterior-posterior axis
Source: eLife. 2019 Apr 26;8:e42015. doi: 10.7554/eLife.42015 (PMC6534381; doi:10.7554/eLife.42015)
Supplement: Figure 6—figure supplement 1—source data 2. [file elife-42015-fig6-figsupp1-data2.xlsx]

## Sheet: Fig6FS1-source data 2
Figure 6-figure supplement 1-source data 2. EdU+ cell quantifications in the head, trunk, and tail.
Quantification in head tip, posterior head, and tail tip regions were performed through a 72μm z-stack along dorsal-ventral axis, and through 33μm z-stack along dorsal-ventral axis for trunk regions
			Head tip	Posterior head
Animal	Head tip area	Post head tip area	# EdU+ cells	# EdU+ cells
nr4A1	72616.4	170549	77	338
nr4A1_batch2	72597.2	170509	34	117
nr4A2	72031.7	170103	87	419
nr4A2_batch2	72604.3	170067	124	281
nr4A3	72005.5	170030	106	443
nr4A3_batch2	72324.4	170766	129	395
nr4A4	72383	170199	129	417
nr4A5	72355.3	170296	112	302
nr4A6	72864.6	170427	95	348
unc1	72068	170493	113	308
unc1_batch2	72790.3	170591	167	207
unc2	72016.4	170761	160	390
unc2_batch2	72483.9	170024	242	388
unc3	72154.8	170214	87	199
unc3_batch2	72689.5	170299	48	177
unc4	72626.5	170100	82	216
Animal	Trunk area	EdU+ cells
nr4A1	120766	83
nr4A1_batch2	120356	23
nr4A2	120322	88
nr4A2_batch2	120143	55
nr4A3	120745	102
nr4A3_batch2	120059	39
nr4A4	120798	161
nr4A5	120783	93
nr4A6	120306	93
unc1	120666	77
unc1_batch2	120384	78
unc2	120368	69
unc2_batch2	120783	170
unc3	120139	46
unc3_batch2	120797	83
unc4	120783	135
Animal	Tail tip area	# EdU+ cells
nr4A_batch2	72413.5	154
nr4A1	72420.6	230
nr4A2	72108.3	148
nr4A3	72582.4	120
nr4A4	72217.3	109
nr4A5	72613.6	117
nr4A6	72409.6	111
unc1	72250.9	128
unc1_batch2	72020.4	88
unc2	72270.5	171
unc2_batch2	72309.6	69
unc3	72644.5	100
unc3_batch2	72162.6	137
unc4	72867.3	99
				Total # EdU+ cells
Animal	Area from head tip to only pair of eyes	Area from head tip to anterior-most eyes (line through the middle of eyes)	Area from head tip to posterior-most eyes (through the middle of eyes)	Head tip to eyes	Head tip to anterior-most eyes	Head tip to posterior most eyes
nr4A1		37743.5	129485		28	185
nr4A1_Dec		45363.7	158048		21	90
nr4A2		20800.7	105020		5	160
nr4A2_Dec		48347.7	115747		78	233
nr4A3		29808	135771		16	267
nr4A3_Dec		53491.9	111294		115	249
nr4A4		21153.7	69520.6		16	111
nr4A5		20793.3	73286.3		14	100
nr4A6		44250.2	83672.4		41	120
unc1	80914.6			108
unc1_Dec	88501.6			193
unc2	76930			139
unc2_Dec	89425.1			272
unc3	81461.8			103
unc3_Dec	117487			86
unc4	81503.6			63
