# Supplementary material for: Nuclear receptor NR4A is required for patterning at the ends of the planarian anterior-posterior axis
Source: eLife. 2019 Apr 26;8:e42015. doi: 10.7554/eLife.42015 (PMC6534381; doi:10.7554/eLife.42015)
Supplement: Figure 6—figure supplement 1—source data 3. [file elife-42015-fig6-figsupp1-data3.xlsx]

## Sheet: Fig6FS1-source data 3
Figure 6-figure supplement 1-source data 3. TUNEL+ cell quantifications in the head.
Quantification in head tip was performed in the areas denoted through the entire dorsal-ventral axis.
Animal	Head tip area	# TUNEL+ cells
nr4A_head_2_TUNEL_9_30_16.lsm	72478.9	22
nr4A_head_3_TUNEL_9_30_16.lsm	72627.5	18
nr4A_head_TUNEL_9_30_16.lsm	72234.8	24
nr4A_batch2_TUNEL_head_2.lsm	72636.3	36
nr4A_batch2_TUNEL_head_3.lsm	72346.7	31
nr4A_batch2_TUNEL_head.lsm	72534.7	23
unc22_head_2_TUNEL_9_30_16.lsm	72713.6	25
unc22_head_TUNEL_9_30_16.lsm	72601	23
unc22_batch2_TUNEL_head_2.lsm	72490.9	33
unc22_batch2_TUNEL_head_3.lsm	72568.3	34
unc22_batch2_TUNEL_head.lsm	72499.9	26
