# Supplementary material for: Nuclear receptor NR4A is required for patterning at the ends of the planarian anterior-posterior axis
Source: eLife. 2019 Apr 26;8:e42015. doi: 10.7554/eLife.42015 (PMC6534381; doi:10.7554/eLife.42015)
Supplement: Figure 6—source data 1. [file elife-42015-fig6-data1.xlsx]

## Sheet: Fig6-source data 1
Figure 6-source data 1. Muscle fiber quantifications at 9 weeks of RNAi.
Animal	# circ fibers/100um	Animal	# long fibers/100um
nr4A_RNAi_9weeks_tail10_muscle_ventral.lsm	35	nr4A_RNAi_9weeks_tail10_muscle_ventral.lsm	28
nr4A_RNAi_9weeks_tail11_muscle_ventral.lsm	34	nr4A_RNAi_9weeks_tail11_muscle_ventral.lsm	39
nr4A_RNAi_9weeks_tail3_muscle_ventral.lsm	38	nr4A_RNAi_9weeks_tail2_muscle_ventral.lsm	38
nr4A_RNAi_9weeks_tail5_muscle_ventral.lsm	35	nr4A_RNAi_9weeks_tail3_muscle_ventral.lsm	43
nr4A_RNAi_9weeks_tail6_muscle_ventral.lsm	49	nr4A_RNAi_9weeks_tail4_muscle_ventral.lsm	35
nr4A_RNAi_9weeks_tail7_muscle_ventral.lsm	31	nr4A_RNAi_9weeks_tail5_muscle_ventral.lsm	42
nr4A_RNAi_9weeks_tail8_muscle_ventral.lsm	38	nr4A_RNAi_9weeks_tail7_muscle_ventral.lsm	29
nr4A_RNAi_9weeks_tail9_muscle_ventral.lsm	46	nr4A_RNAi_9weeks_tail9_muscle_ventral.lsm	35
unc_RNAi_9weeks_tail2_muscle_ventral.lsm	30	unc_RNAi_9weeks_tail_muscle_ventral.lsm	42
unc_RNAi_9weeks_tail5_muscle_ventral.lsm	44	unc_RNAi_9weeks_tail2_muscle_ventral.lsm	44
unc_RNAi_9weeks_tail6_muscle_ventral.lsm	38	unc_RNAi_9weeks_tail3_muscle_ventral.lsm	48
unc_RNAi_9weeks_tail7_muscle_ventral.lsm	33	unc_RNAi_9weeks_tail5_muscle_ventral.lsm	36
unc_RNAi_9weeks_tail8_muscle_ventral.lsm	31	unc_RNAi_9weeks_tail6_muscle_ventral.lsm	38
unc_RNAi_9weeks_tail9_muscle_ventral.lsm	38	unc_RNAi_9weeks_tail7_muscle_ventral.lsm	31
nr4A_RNAi_9weeks_trunk_muscle_ventral.lsm	34	unc_RNAi_9weeks_tail8_muscle_ventral.lsm	40
nr4A_RNAi_9weeks_trunk2_muscle_ventral.lsm	48	unc_RNAi_9weeks_tail9_muscle_ventral.lsm	34
nr4A_RNAi_9weeks_trunk3_muscle_ventral.lsm	27	nr4A_RNAi_9weeks_trunk_muscle_ventral.lsm	31
nr4A_RNAi_9weeks_trunk4_muscle_ventral.lsm	28	nr4A_RNAi_9weeks_trunk2_muscle_ventral.lsm	33
nr4A_RNAi_9weeks_trunk5_muscle_ventral2.lsm	35	nr4A_RNAi_9weeks_trunk3_muscle_ventral.lsm	27
nr4A_RNAi_9weeks_trunk6_muscle_ventral.lsm	25	nr4A_RNAi_9weeks_trunk4_muscle_ventral.lsm	26
nr4A_RNAi_9weeks_trunk7_muscle_ventral.lsm	35	nr4A_RNAi_9weeks_trunk5_muscle_ventral2.lsm	31
nr4A_RNAi_9weeks_trunk8_muscle_ventral.lsm	29	nr4A_RNAi_9weeks_trunk6_muscle_ventral.lsm	44
nr4A_RNAi_9weeks_trunk9_muscle_ventral.lsm	37	nr4A_RNAi_9weeks_trunk7_muscle_ventral.lsm	33
unc_RNAi_9weeks_trunk_muscle_ventral.lsm	34	nr4A_RNAi_9weeks_trunk8_muscle_ventral.lsm	31
unc_RNAi_9weeks_trunk10_muscle_ventral.lsm	34	nr4A_RNAi_9weeks_trunk9_muscle_ventral.lsm	28
unc_RNAi_9weeks_trunk2_muscle_ventral.lsm	48	unc_RNAi_9weeks_trunk_muscle_ventral.lsm	30
unc_RNAi_9weeks_trunk3_muscle_ventral.lsm	48	unc_RNAi_9weeks_trunk10_muscle_ventral.lsm	46
unc_RNAi_9weeks_trunk4_muscle_ventral.lsm	35	unc_RNAi_9weeks_trunk2_muscle_ventral.lsm	35
unc_RNAi_9weeks_trunk5_muscle_ventral2.lsm	31	unc_RNAi_9weeks_trunk3_muscle_ventral.lsm	36
unc_RNAi_9weeks_trunk6_muscle_ventral.lsm	45	unc_RNAi_9weeks_trunk4_muscle_ventral.lsm	31
unc_RNAi_9weeks_trunk7_muscle_ventral.lsm	35	unc_RNAi_9weeks_trunk5_muscle_ventral2.lsm	30
unc_RNAi_9weeks_trunk8_muscle_ventral.lsm	39	unc_RNAi_9weeks_trunk6_muscle_ventral.lsm	30
unc_RNAi_9weeks_trunk9_muscle_ventral.lsm	34	unc_RNAi_9weeks_trunk7_muscle_ventral.lsm	32
		unc_RNAi_9weeks_trunk8_muscle_ventral.lsm	44
		unc_RNAi_9weeks_trunk9_muscle_ventral.lsm	44
