# Supplementary material for: Nuclear receptor NR4A is required for patterning at the ends of the planarian anterior-posterior axis
Source: eLife. 2019 Apr 26;8:e42015. doi: 10.7554/eLife.42015 (PMC6534381; doi:10.7554/eLife.42015)
Supplement: Figure 6—source data 2. [file elife-42015-fig6-data2.xlsx]

## Sheet: Fig6-source data 2
Figure 6-source data 2. Quantification of number of collagen+ muscle cells at the head tip and tail tip of 9 week RNAi animals, and at the head tip of 4 week RNAi animals.
Quantification volume:
190um x 125um area at the tail tip (indicated on Fig4E) through the entire dorsal-ventral axis
Animal	# collagen+ cells
nr4A_RNAi_9weeks_collagen(FITC)_DAPI_tail_10.lsm	336
nr4A_RNAi_9weeks_collagen(FITC)_DAPI_tail_2.lsm	299
nr4A_RNAi_9weeks_collagen(FITC)_DAPI_tail.lsm	264
nr4A_RNAi_9weeks_collagen(FITC)_DAPI_tail_3.lsm	369
nr4A_RNAi_9weeks_collagen(FITC)_DAPI_tail_4.lsm	294
nr4A_RNAi_9weeks_collagen(FITC)_DAPI_tail_5.lsm	341
nr4A_RNAi_9weeks_collagen(FITC)_DAPI_tail_6.lsm	322
nr4A_RNAi_9weeks_collagen(FITC)_DAPI_tail_8.lsm	273
nr4A_RNAi_9weeks_collagen(FITC)_DAPI_tail_9.lsm	337
unc22_RNAi_9weeks_collagen(FITC)_DAPI_tail_2.lsm	370
unc22_RNAi_9weeks_collagen(FITC)_DAPI_tail.lsm	329
unc22_RNAi_9weeks_collagen(FITC)_DAPI_tail_3.lsm	364
unc22_RNAi_9weeks_collagen(FITC)_DAPI_tail_4.lsm	319
unc22_RNAi_9weeks_collagen(FITC)_DAPI_tail_6.lsm	277
unc22_RNAi_9weeks_collagen(FITC)_DAPI_tail_7.lsm	305
unc22_RNAi_9weeks_collagen(FITC)_DAPI_tail_8.lsm	185
unc22_RNAi_9weeks_collagen(FITC)_DAPI_tail_9.lsm	250
nr4A_RNAi_9weeks_collagen(FITC)_DAPI_head_1.lsm	126
nr4A_RNAi_9weeks_collagen(FITC)_DAPI_head_10.lsm	140
nr4A_RNAi_9weeks_collagen(FITC)_DAPI_head_11.lsm	143
nr4A_RNAi_9weeks_collagen(FITC)_DAPI_head_2.lsm	162
nr4A_RNAi_9weeks_collagen(FITC)_DAPI_head_4.lsm	152
nr4A_RNAi_9weeks_collagen(FITC)_DAPI_head_6.lsm	156
nr4A_RNAi_9weeks_collagen(FITC)_DAPI_head_9.lsm	194
un22_RNAi_9weeks_collagen(FITC)_DAPI_head_1.lsm	300
un22_RNAi_9weeks_collagen(FITC)_DAPI_head_2.lsm	293
un22_RNAi_9weeks_collagen(FITC)_DAPI_head_4.lsm	285
un22_RNAi_9weeks_collagen(FITC)_DAPI_head_5.lsm	301
un22_RNAi_9weeks_collagen(FITC)_DAPI_head_6.lsm	272
un22_RNAi_9weeks_collagen(FITC)_DAPI_head_7.lsm	321
un22_RNAi_9weeks_collagen(FITC)_DAPI_head_8.lsm	249
unc22_RNAi_4weeks_collagen(FITC)_DAPI_head_1.tif	311
unc22_RNAi_4weeks_collagen(FITC)_DAPI_head_2.tif	352
unc22_RNAi_4weeks_collagen(FITC)_DAPI_head_3.tif	301
unc22_RNAi_4weeks_collagen(FITC)_DAPI_head_4.tif	339
unc22_RNAi_4weeks_collagen(FITC)_DAPI_head_5.tif	326
unc22_RNAi_4weeks_collagen(FITC)_DAPI_head_6.tif	373
unc22_RNAi_4weeks_collagen(FITC)_DAPI_head_7.tif	302
unc22_RNAi_4weeks_collagen(FITC)_DAPI_head_8.tif	297
nr4A_RNAi_4weeks_collagen(FITC)_DAPI_head_1.tif	369
nr4A_RNAi_4weeks_collagen(FITC)_DAPI_head_2.tif	304
nr4A_RNAi_4weeks_collagen(FITC)_DAPI_head_3.tif	347
nr4A_RNAi_4weeks_collagen(FITC)_DAPI_head_4.tif	377
nr4A_RNAi_4weeks_collagen(FITC)_DAPI_head_5.tif	337
nr4A_RNAi_4weeks_collagen(FITC)_DAPI_head_6.tif	323
nr4A_RNAi_4weeks_collagen(FITC)_DAPI_head_7.tif	267
nr4A_RNAi_4weeks_collagen(FITC)_DAPI_head_8.tif	299
