# Supplementary material for: Nuclear receptor NR4A is required for patterning at the ends of the planarian anterior-posterior axis
Source: eLife. 2019 Apr 26;8:e42015. doi: 10.7554/eLife.42015 (PMC6534381; doi:10.7554/eLife.42015)
Supplement: Figure 6—source data 3. [file elife-42015-fig6-data3.xlsx]

## Sheet: Fig6-source data 3
Figure 6-source data 3. EdU+; collagen+ quantifications in the head, trunk, and tail.
Quantification in head tip, posterior head, and tail tip regions were performed through a 72μm z-stack along dorsal-ventral axis, and through 33μm z-stack along dorsal-ventral axis for trunk regions
			Head tip	Posterior head
Animal	Head tip area	Post head tip area	# EdU+; collagen+ cells	# Edu+; collagen+ cells
nr4A1	72616.4	170549	8	32
nr4A1_batch2	72597.2	170509	3	6
nr4A2	72031.7	170103	14	35
nr4A2_batch2	72604.3	170067	12	22
nr4A3	72005.5	170030	8	24
nr4A3_batch2	72324.4	170766	17	18
nr4A4	72383	170199	9	30
nr4A5	72355.3	170296	9	33
nr4A6	72864.6	170427	17	18
unc1	72068	170493	23	29
unc1_batch2	72790.3	170591	21	17
unc2	72016.4	170761	21	21
unc2_batch2	72483.9	170024	30	31
unc3	72154.8	170214	25	21
unc3_batch2	72689.5	170299	7	6
unc4	72626.5	170100	19	20
Animal	Trunk area	# Edu+; collagen+ cells
nr4A1	120766	16
nr4A1_batch2	120356	7
nr4A2	120322	16
nr4A2_batch2	120143	5
nr4A3	120745	8
nr4A3_batch2	120059	5
nr4A4	120798	28
nr4A5	120783	11
nr4A6	120306	15
unc1	120666	10
unc1_batch2	120384	7
unc2	120368	13
unc2_batch2	120783	20
unc3	120139	22
unc3_batch2	120797	6
unc4	120783	13
Animal	Tail tip area	# Edu+; collagen+
nr4A_batch2	72413.5	13
nr4A1	72420.6	35
nr4A2	72108.3	32
nr4A3	72582.4	21
nr4A4	72217.3	18
nr4A5	72613.6	25
nr4A6	72409.6	11
unc1	72250.9	20
unc1_batch2	72020.4	19
unc2	72270.5	33
unc2_batch2	72309.6	13
unc3	72644.5	28
unc3_batch2	72162.6	24
unc4	72867.3	23
				# EdU+; collagen+ eyes
Animal	Area from head tip to only pair of eyes	Area from head tip to anterior-most eyes (line through the middle of eyes)	Area from head tip to posterior-most eyes (through the middle of eyes)	Head tip to eyes	Head tip to anterior-most eyes	Head tip to posterior most eyes
nr4A1		37743.5	129485		4	30
nr4A1_Dec		45363.7	158048		4	17
nr4A2		20800.7	105020		0	26
nr4A2_Dec		48347.7	115747		14	38
nr4A3		29808	135771		2	45
nr4A3_Dec		53491.9	111294		21	40
nr4A4		21153.7	69520.6		3	24
nr4A5		20793.3	73286.3		3	15
nr4A6		44250.2	83672.4		8	23
unc1	80914.6			36
unc1_Dec	88501.6			47
unc2	76930			41
unc2_Dec	89425.1			53
unc3	81461.8			34
unc3_Dec	117487			18
unc4	81503.6			22
