# Supplementary material for: Nuclear receptor NR4A is required for patterning at the ends of the planarian anterior-posterior axis
Source: eLife. 2019 Apr 26;8:e42015. doi: 10.7554/eLife.42015 (PMC6534381; doi:10.7554/eLife.42015)
Supplement: Figure 8—source data 1. [file elife-42015-fig8-data1.xlsx]

## Sheet: Fig8-source data 1
Figure 8-source data 1. Quantification of anterior pole cell distance from head apex, normalized to inter-eye distance in each animal.
Non-irradiated animals				Irradiated animals
Cell	control	Cell	nr4A RNAi	Cell	control	Cell	nr4A RNAi
1	0.316308	1	0.77864	1	0.291075	1	0.0578215
2	0.153624	2	0.691626	2	0.142139	2	0.0713841
3	0.0444813	3	0.539901	3	0.144121	3	0.089641
4	0.0428462	4	0.526343	4	0.0676736	4	0.108653
5	0.0274721	5	0.516779	5	0.102652	5	0.150704
6	0.0908905	6	0.489556	6	0.166619	6	0.194488
7	0.125569	7	0.437636	7	0.304947	7	0.141348
8	0.0856924	8	0.436548	8	0.233736	8	0.109709
9	0.135341	9	0.416418	9	0.177399	9	0.073139
10	0.136691	10	0.390993	10	0.181465	10	0.120141
11	0.293298	11	0.375251	11	0.183243	11	0.12457
12	0.147249	12	0.369558	12	0.15312	12	0.049216
13	0.0993098	13	0.352347	13	0.188959	13	0.140543
14	0.29271	14	0.352286	14	0.113615	14	0.0987713
15	0.140986	15	0.349623	15	0.187992	15	0.117973
16	0.25723	16	0.349564	16	0.140198	16	0.0621086
17	0.0715637	17	0.339613	17	0.0722595	17	0.118087
18	0.0950308	18	0.313704	18	0.155137	18	0.107591
19	0.126282	19	0.313195	19	0.089732	19	0.060802
20	0.0433967	20	0.273532	20	0.0463241	20	0.418588
21	0.114801	21	0.27182	21	0.128061	21	0.0603325
22	0.0946286	22	0.27182	22	0.0933692	22	0.192273
23	0.160779	23	0.268125	23	0.194312	23	0.594212
24	0.14144	24	0.266461	24	0.231631	24	0.199005
25	0.133731	25	0.262158	25	0.11551	25	0.0928037
26	0.0247654	26	0.258737	26	0.131816	26	0.0809635
27	0.049966	27	0.257186	27	0.199352	27	0.0521883
28	0.202847	28	0.256434	28	0.114216	28	0.106402
29	0.296529	29	0.239684	29	0.0820671	29	0.0764509
30	0.163076	30	0.239249	30	0.114848	30	0.0255957
31	0.124429	31	0.235469	31	0.185826	31	0.102383
32	0.104629	32	0.22977	32	0.218053	32	0.0849565
33	0.407623	33	0.227549	33	0.0634912	33	0.1145
34	0.0838509	34	0.221844	34	0.163944	34	0.120483
35	0.099635	35	0.21823	35	0.151716	35	0.0637425
36	0.0853579	36	0.213957	36	0.115762	36	0.0763807
37	0.128108	37	0.184975	37	0.263149	37	0.0920391
38	0.110719	38	0.183241	38	0.179654	38	0.130398
39	0.183321	39	0.180049	39	0.246435	39	0.297694
40	0.308029	40	0.177308	40	0.310045	40	0.0564726
41	0.0598798	41	0.168693	41	0.243105	41	0.172017
42	0.126867	42	0.167441	42	0.0572226	42	0.140092
43	0.171702	43	0.162382	43	0.076492	43	0.0462799
44	0.19925	44	0.160343	44	0.075432	44	0.113302
45	0.124009	45	0.159699	45	0.0191055	45	0.0645049
46	0.0663499	46	0.155394	46	0.136833	46	0.102038
47	0.101972	47	0.152806	47	0.0990583	47	0.139271
48	0.0954118	48	0.152399	48	0.0922687	48	0.183052
		49	0.143261	49	0.0426229	49	0.152002
		50	0.141354	50	0.0272134	50	0.0385617
		51	0.141147	51	0.0898068	51	0.159234
		52	0.138835	52	0.144401	52	0.115979
		53	0.131599	53	0.156514	53	0.0895331
		54	0.127504	54	0.111894	54	0.139207
		55	0.126411	55	0.184476	55	0.10802
		56	0.125278	56	0.376543	56	0.0585738
		57	0.122868	57	0.141609	57	0.120219
		58	0.120373			58	0.138018
		59	0.119138			59	0.175628
		60	0.113457			60	0.23896
		61	0.112053			61	0.110731
		62	0.101332			62	0.142251
		63	0.0971629			63	0.322914
		64	0.0959924			64	0.427451
		65	0.0877045			65	0.16362
		66	0.0848733			66	0.189219
		67	0.08187			67	0.26286
		68	0.0796425			68	0.192959
		69	0.0776941
		70	0.0762599
		71	0.0754273
		72	0.0681647
		73	0.0655031
		74	0.0654687
		75	0.0637889
		76	0.0614226
		77	0.0589224
		78	0.0557793
		79	0.0520579
		80	0.0517263
		81	0.0513464
		82	0.0451134
		83	0.0424123
		84	0.0364598
