# Supplementary material for: Nuclear receptor NR4A is required for patterning at the ends of the planarian anterior-posterior axis
Source: eLife. 2019 Apr 26;8:e42015. doi: 10.7554/eLife.42015 (PMC6534381; doi:10.7554/eLife.42015)
Supplement: Figure 9—source data 1. [file elife-42015-fig9-data1.xlsx]

## Sheet: Fig9-source data 1
Figure 9-source data 1. SMEDWI-1+; opsin+ cell quantification in eyes of control and nr4A(RNAi) animals.
2 Eye Pairs
	nr4A RNAi: anterior Eyes					nr4A RNAi: Posterior Eyes					control: Eyes
	# In eye	#Outside Eye	Total			# In eye	#Outside Eye	Total			# In eye	#Outside Eye	Total
	0	1	1			9	4	13			6	5	11
	1	0	1			4	4	8			0	2	2
	0	0	0			11	2	13			7	1	8
	0	0	0			4	3	7			5	1	6			One-tailed T-Tests
	0	0	0			3	3	6			1	0	1			Ant v. Post (In Eye)	7.06993e-09
	0	0	0			6	3	9			1	0	1			Ant v. Post (Total)	5.49167e-10
	0	0	0			6	6	12			10	0	10			Ant v. Unc (In Eye)	2.09107e-07
	0	0	0			3	7	10			3	2	5			Ant v. Unc (Total)	9.91417e-08
	0	0	0			3	1	4			2	0	2			Post v. Unc (In Eye)	0.0918907
	0	0	0			5	8	13			3	1	4			Post v. Unc (Total)	0.000524419
	0	0	0			1	3	4			4	0	4
	0	0	0			2	2	4			0	2	2
	0	0	0			6	5	11			3	0	3
	0	0	0			4	2	6			4	0	4
	0	0	0			5	3	8			3	0	3
	0	0	0			3	2	5			4	0	4
	0	0	0			4	0	4			8	0	8
	0	0	0			3	1	4			4	3	7
	0	0	0			4	5	9			3	0	3
	1	0	1			8	1	9			5	0	5
	0	0	0			3	1	4			1	0	1
	0	0	0			3	0	3			4	0	4
	0	0	0								4	0	4
	0	0	0								1	0	1
AVERAGE	0.0833333		0.125			4.54545		7.54545			3.58333		4.29167
ST DEV	0.28233		0.337832			2.36497		3.39085			2.46571		2.80495
3 Eye Pairs
	nr4A RNAi: Anterior eyes				nr4A RNAi: Middle eyes				nr4A RNAi: Posterior eyes				control: eyes
	# +/+ in Eye	# +/+ Outside Eye	Total		# +/+ in Eye	# +/+ Outside Eye	Total		# +/+ in Eye	# +/+ Outside Eye	Total		# +/+ in Eye	# +/+ Outside Eye	Total
	0	0	0		0	0	0		4	2	6		7	1	8
	0	0	0		0	0	0		5	1	6		5	3	8
	0	0	0		0	0	0		7	6	13		5	0	5
	0	0	0		0	0	0		4	0	4		6	1	7
	0	0	0		0	0	0		3	0	3		8	1	9
	0	0	0		0	0	0		3	0	3		5	1	6
	0	0	0		0	0	0		6	0	6		8	4	12
	0	0	0		1	0	1		4	1	5		4	3	7		One-Tailed T-Tests
	0	0	0		2	0	2		9	2	11		5	1	6		Post-Unc (In eye)	0.100627
	0	0	0		0	0	0		5	0	5		6	0	6		Post-Ant (In eye)	2.99253e-09
	0	0	0		1	0	1		2	0	2		7	2	9		Post-Middle (In eye)	3.62258e-09
	1	0	1		0	0	0		5	1	6		6	0	6		Ant-Middle (In eye)	0.1274
	0	0	0		0	0	0		3	0	3		8	0	8		Ant-Unc (In eye)	1.97318e-15
	1	0	1		1	0	1		7	2	9		4	0	4		Middle-Unc (In eye)	2.11168e-16
	0	0	0		0	0	0		5	0	5		4	0	4		Post-Unc (Total)	0.327122
	0	0	0		0	0	0		4	0	4		6	1	7		Post-Ant (Total)	8.98025e-08
	1	0	1		0	0	0		3	7	10		5	0	5		Post-Middle (Total)	1.25713e-07
	0	0	0		2	0	2		6	1	7		6	2	8		Ant-Middle (Total)	0.1274
	0	0	0		0	0	0		2	0	2		4	1	5		Ant-Unc (Total)	3.95038e-13
	0	0	0		0	0	0		10	3	13		3	0	3		Middle-Unc (Total)	1.95492e-13
	0	0	0		0	0	0						5	0	5
	0	0	0		0	0	0						6	0	6
AVERAGE	0.136364		0.136364		0.318182		0.318182		4.85		6.15		5.59091		6.54545
ST DEV	0.35125		0.35125		0.646335		0.646335		2.15883		3.39155		1.40269		2.04071
