# Supplementary material for: Nuclear receptor NR4A is required for patterning at the ends of the planarian anterior-posterior axis
Source: eLife journal article supplement (doi:10.7554/elife.42015), 2019-04-26
Supplement: supp [file elife-42015-supp-v1.zip]

Figure 9-figure supplement 1

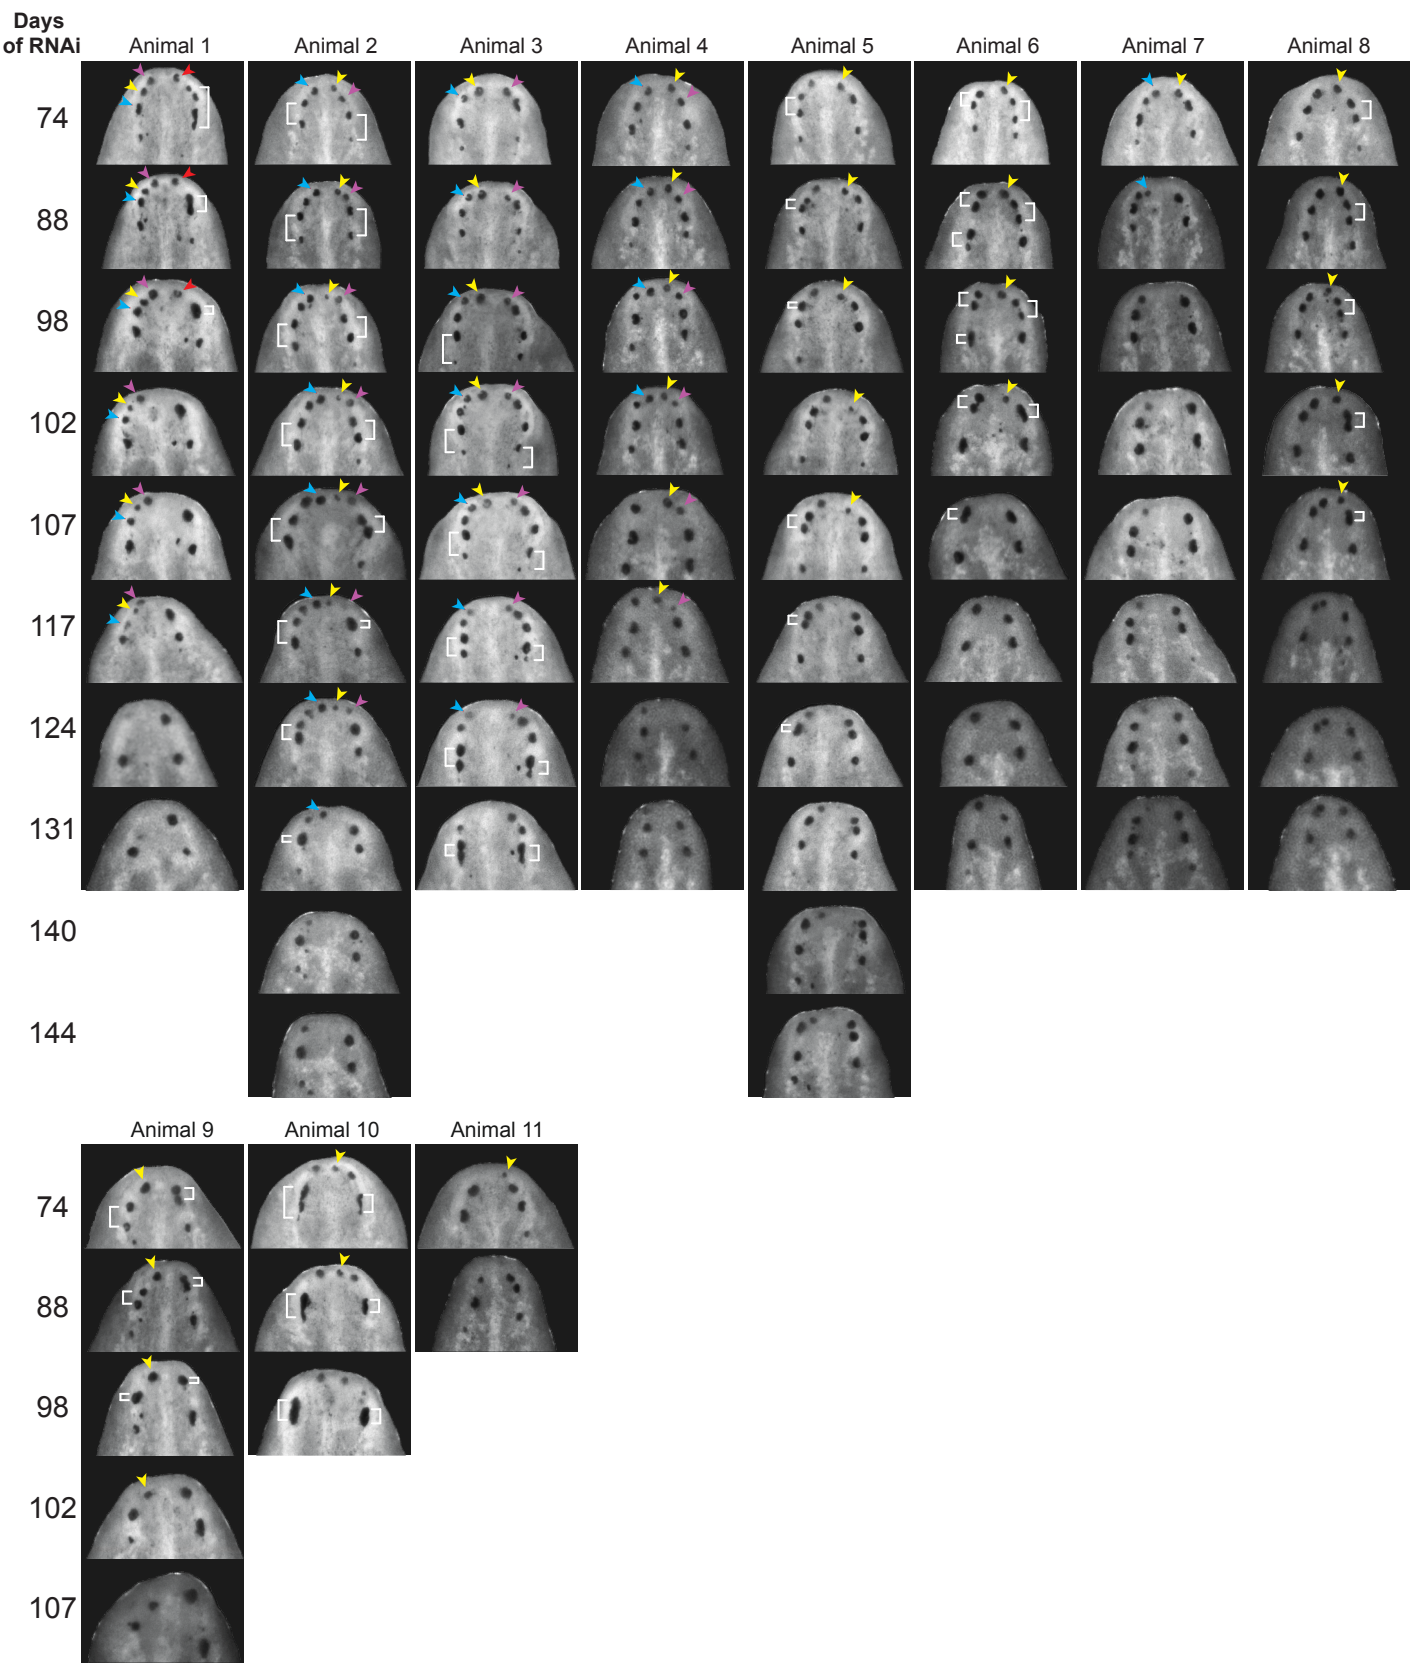

**Figure 9-figure supplement 1. Anterior eyes disappear and fuse in long-term *nr4A* RNAi.** Time course of long-term *nr4A* RNAi cataloging instances of eye disappearance and fusion. Single *nr4A*(RNAi) animals were separated and individually imaged over time. Eyes crowded near the head tip in *nr4A*(RNAi) animals were observed to disappear (colored arrow heads in frames in which they appear) or fuse (white brackets).
