# Supplementary material for: Nuclear receptor NR4A is required for patterning at the ends of the planarian anterior-posterior axis
Source: eLife journal article supplement (doi:10.7554/elife.42015), 2019-04-26
Supplement: supp [file elife-42015-supp-v1.zip]

Figure 4-figure supplement 1

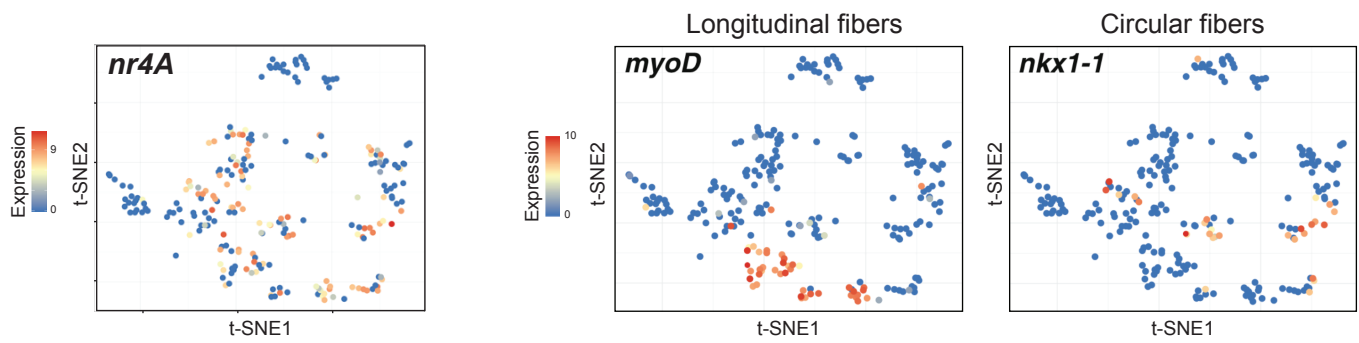

Figure 4-figure supplement 1. Planarian *nr4A* is expressed broadly in body-wall muscle, including in longitudinal and circular muscle fibers. Mapping of *nr4A*, *nkx1-1*, and *myoD* expression in single-muscle-cell t-SNE plots generated in Scimone et al. (2018).
