# Supplementary material for: Nuclear receptor NR4A is required for patterning at the ends of the planarian anterior-posterior axis
Source: eLife journal article supplement (doi:10.7554/elife.42015), 2019-04-26
Supplement: supp [file elife-42015-supp-v1.zip]

Figure 5-figure supplement 1

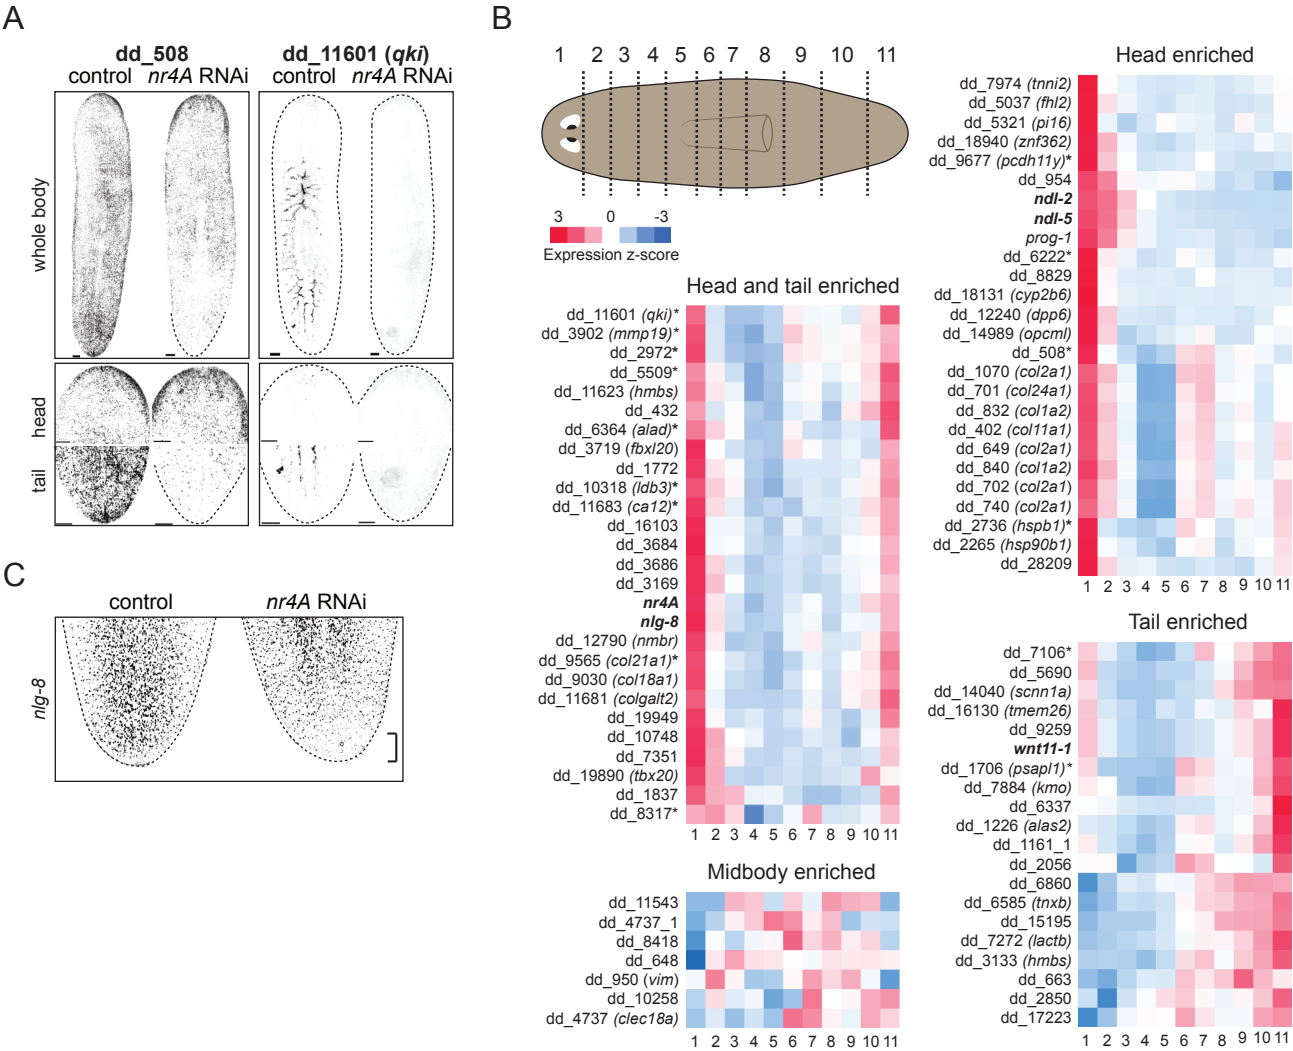

**Figure 5-figure supplement 1. *nr4A*-regulated gene expression patterns and regulation by *nr4A* RNAi.** (A) Expression patterns of additional genes regulated by *nr4A* in both the head and the tail and their down-regulation by *nr4A* RNAi, shown by FISH. Dotted lines denote animal boundaries. All animals were analyzed at 9 weeks of RNAi. Scale bars represent 150µm. (B) *nr4A* and *nr4A*-target expression levels (as z-scores calculated from FPKM) in each of the denoted anterior-posterior segments (cartoon) from Stückemann et al. (2017). Genes are grouped into head and tail enriched, head enriched, midbody enriched, and tail enriched. *nr4A* and PCG gene names are in bold; gene names with an asterisk are genes with significant expression changes in both the head and tail in *nr4A* RNAi compared to control RNAi. See Methods for gene nomenclature. (C) *nlg-8* expression at the tail tip of *nr4A*(RNAi) animals and control animals at 9 weeks of RNAi. Images are maximum intensity projections and are representative of results seen in at least 3 animals.
