# Supplementary material for: Nuclear receptor NR4A is required for patterning at the ends of the planarian anterior-posterior axis
Source: eLife journal article supplement (doi:10.7554/elife.42015), 2019-04-26
Supplement: supp [file elife-42015-supp-v1.zip]

## Figure 2-figure supplement 2

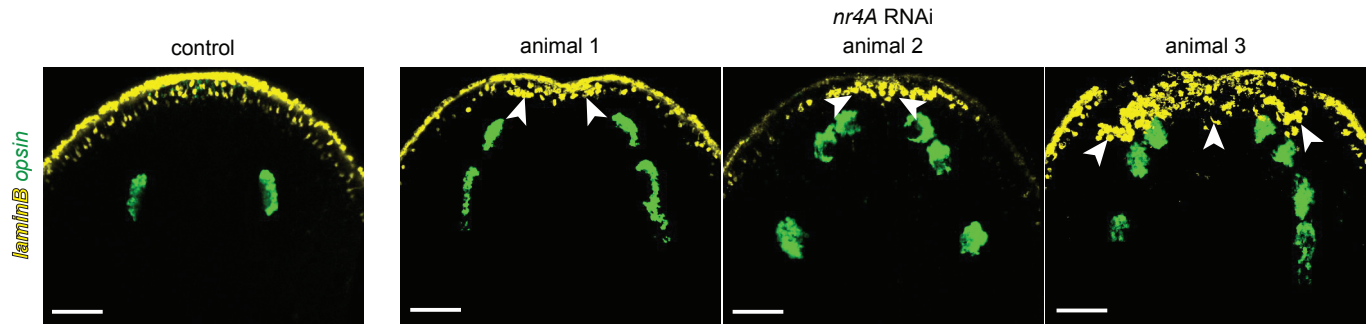

**Figure 2-figure supplement 2. *nr4A* RNAi leads to the appearance of ectopic *laminB*<sup>+</sup> cells posterior to the dorsal-ventral (DV) boundary of the head tip. *laminB* and *opsin* expression by FISH. *nr4A* was inhibited for 9 weeks in *nr4A(RNAi)* animals 1 and 2, and for 11 weeks in *nr4A(RNAi)* animal 3. Scale bars represent 100μm. Images are maximum intensity projections.**
