# Supplementary material for: Nuclear receptor NR4A is required for patterning at the ends of the planarian anterior-posterior axis
Source: eLife journal article supplement (doi:10.7554/elife.42015), 2019-04-26
Supplement: supp [file elife_poa_e42015_Supplementary_file_1.xls]

## Sheet: SF1A
Supplementary file 1A. Anterior-pole-enriched genes in uninjured animals.
Genes with padj <0.05 sorted by foldChange
Anterior pole markers are highlighted
Contig ID	foldChange	padj	Best-blast hit	ID	E-Value	Organism
dd_Smed_v4_23249	20.0757	1.83379e-26	winged helix/forkhead transcription factor (foxd)	KC577557.1	0	Smed
dd_Smed_v4_12485	14.0008	7.43453e-29	deoxyhypusine synthase (DHPS)	uc002muh.2	2e-141	Human
dd_Smed_v4_24180	10.822	3.67046e-31	notum	JF725701.1	0	Smed
dd_Smed_v4_74605	9.49865	0.0194108	NA	uc010rbf.2	2e-17	Human
dd_Smed_v4_23400	7.44349	3.97995e-06	NA	NA	NA	NA
dd_Smed_v4_47419	6.84698	0.00231786	NA	uc002enu.4	4e-17	Human
dd_Smed_v4_13188	6.32452	2.96035e-33	Kallmann syndrome 1 sequence (KAL1)	uc004csf.3	8e-22	Human
dd_Smed_v4_16209	6.08656	3.57972e-05	Wnt11-2	FJ463751.1	0	Smed
dd_Smed_v4_49372	5.57039	2.88298e-14	dynein, axonemal, heavy chain 10 (DNAH10)	uc001uft.4	2e-79	Human
dd_Smed_v4_39577	4.3436	0.0186711	NA	NA	NA	NA
dd_Smed_v4_13875	4.27659	3.74124e-11	NA	NA	NA	NA
dd_Smed_v4_27668	4.12043	4.16879e-47	EPH receptor B1 (EPHB1)	uc003equ.3	5e-60	Human
dd_Smed_v4_8201	3.9904	1.29719e-19	dynein, axonemal, heavy chain 10 (DNAH10)	uc001uft.4	0	Human
dd_Smed_v4_25387	3.90647	5.10618e-48	hypothetical protein Smed-asns	KY348648.1	0	Smed
dd_Smed_v4_20026	3.84194	8.18641e-05	NA	NA	NA	NA
dd_Smed_v4_35379	3.77854	1.42452e-14	ISL LIM homeobox 2 (ISL2)	uc002bbw.1	8e-22	Human
dd_Smed_v4_22615	3.64403	3.92179e-17	asparagine synthetase (glutamine-hydrolyzing) (ASNS)5	uc003uox.4	6e-11	Human
dd_Smed_v4_39545	3.60183	6.08826e-22	EPH receptor A2 (EPHA2)	uc010oca.2	2e-37	Human
dd_Smed_v4_5147	3.43153	2.26143e-15	NA	NA	NA	NA
dd_Smed_v4_16070	3.32953	0.000241456	1G06 musculin	KJ573365.1	0	Smed
dd_Smed_v4_40708	3.12236	6.09662e-07	NA	NA	NA	NA
dd_Smed_v4_19949	3.10901	3.28416e-08	NA	NA	NA	NA
dd_Smed_v4_93315	2.79853	2.86995e-06	NA	NA	NA	NA
dd_Smed_v4_8371	2.79771	1.41592e-16	protein kinase, cAMP-dependent, catalytic, alpha (PRKACA)	uc002myc.3	2e-168	Human
dd_Smed_v4_1574	2.76882	0.037958	TNF receptor-associated factor	GU591866.1	5.17e-99	Smed
dd_Smed_v4_13823	2.64465	8.00444e-29	delta-like 1 (Drosophila) (DLL1)	uc003qxm.3	2e-84	Human
dd_Smed_v4_10673	2.48667	0.000898193	ovo-like 1(Drosophila) (OVOL1)	uc001ofq.3	2e-48	Human
dd_Smed_v4_15506	2.44678	0.000180276	snail-1	KY964486.1	0	Smed
dd_Smed_v4_4427	2.44322	0.0148631	hypothetical protein 4427	KY348688.1	0	Smed
dd_Smed_v4_13985	2.4078	0.00091943	hypothetical protein Smed-sfrp1	KY348681.1	0	Smed
dd_Smed_v4_12269	2.39502	0.00403468	NA	NA	NA	NA
dd_Smed_v4_348	2.31532	5.9094e-08	peptidylprolyl isomerase C (cyclophilin C) (PPIC)	uc003kth.3	9e-47	Human
dd_Smed_v4_12111	2.31353	1.3121e-07	slit1	DQ336176.3	0	Smed
dd_Smed_v4_12269	2.30411	0.0107624	NA	NA	NA	NA
dd_Smed_v4_1242	2.14714	5.25058e-07	peptidylprolyl isomerase C (cyclophilin C) (PPIC)	uc003kth.3	4e-47	Human
dd_Smed_v4_12650	2.12953	0.0243673	GUCY1B2	uc010tgo.2	8e-48	Human
dd_Smed_v4_14635	2.08594	1.80448e-09	forkhead box J1-like protein 1	JX842843.1	0	Smed
dd_Smed_v4_380	2.08259	0.0081274	NA	NA	NA	NA
dd_Smed_v4_23030	2.07849	3.92417e-08	NA	NA	NA	NA
dd_Smed_v4_8829	2.06952	3.8115e-12	phosphogluconate dehydrogenase (PGD)	uc001arc.3	0	Human
dd_Smed_v4_13975	2.03622	0.00126145	PKD1L-2 (PKD1L-2)	KT163775.1	0	Smed
dd_Smed_v4_12426	2.03103	0.00258139	NA	NA	NA	NA
dd_Smed_v4_10089	2.03077	1.60813e-11	NA	NA	NA	NA
dd_Smed_v4_1949	2.00542	3.92179e-17	NA	NA	NA	NA
dd_Smed_v4_13814	1.96344	0.0484947	NA	NA	NA	NA
dd_Smed_v4_12653	1.96175	6.14199e-05	glutamate decarboxylase 1 (brain, 67kDa) (GAD1)GAD67	uc002ugi.3	0	Human
dd_Smed_v4_18393	1.95566	7.58974e-06	unc-5 homolog B (C. elegans) (UNC5B)	uc001jro.3	3e-37	Human
dd_Smed_v4_28398	1.94947	0.0242333	wntP-1 (wntP-1)	EU296630.1	0	Smed
dd_Smed_v4_17589	1.93864	5.0222e-08	KCNA1	uc021qts.1	6e-140	Human
dd_Smed_v4_28076	1.93301	0.0047544	slc43a-1 (slc43a-1)	KT163733.1	0	Smed
dd_Smed_v4_18393	1.93113	1.27852e-05	unc-5 homolog B (C. elegans) (UNC5B)	uc001jro.3	3e-37	Human
dd_Smed_v4_24483	1.92442	1.007e-05	NA	NA	NA	NA
dd_Smed_v4_15253	1.91492	0.00872335	pitx	KF134113.1	0	Smed
dd_Smed_v4_14647	1.9103	0.00994655	NA	NA	NA	NA
dd_Smed_v4_16571	1.90716	9.37295e-12	hypothetical protein Smed-fzd-5/8-3	KY348663.1	0	Smed
dd_Smed_v4_4196	1.89687	6.03187e-12	NA	NA	NA	NA
dd_Smed_v4_13065	1.89142	9.68189e-08	tr5_12233	KP003816.1	0	Smed
dd_Smed_v4_36844	1.88985	0.00506415	GCR087 (gcr087)	KX018893.1	0	Smed
dd_Smed_v4_9584	1.87451	1.04781e-07	follistatin	JX010480.1	0	Smed
dd_Smed_v4_8393	1.87379	1.20538e-05	sulfatase modifying factor 2 (SUMF2)	uc011kcw.2	6e-63	Human
dd_Smed_v4_1538	1.87045	0.0142676	secreted peptide prohormone-13	BK007029.1	1.34e-150	Smed
dd_Smed_v4_12635	1.86775	3.69595e-05	NA	NA	NA	NA
dd_Smed_v4_7911	1.84425	1.04151e-11	hypothetical protein Smed-ror	KY348676.1	0	Smed
dd_Smed_v4_4196	1.84266	6.06834e-11	NA	NA	NA	NA
dd_Smed_v4_16928	1.83425	1.56424e-10	EPH receptor A4 (EPHA4)	uc010zlm.1	0	Human
dd_Smed_v4_18393	1.82692	0.000180276	unc-5 homolog B (C. elegans) (UNC5B)	uc001jro.3	3e-37	Human
dd_Smed_v4_4196	1.82657	1.19528e-10	NA	NA	NA	NA
dd_Smed_v4_18393	1.79408	0.000373089	unc-5 homolog B (C. elegans) (UNC5B)	uc001jro.3	3e-37	Human
dd_Smed_v4_8375	1.78133	2.37806e-09	NA	NA	NA	NA
dd_Smed_v4_4196	1.77915	9.68842e-10	NA	NA	NA	NA
dd_Smed_v4_18952	1.76304	0.0220518	scratch-like	KJ934813.1	0	Smed
dd_Smed_v4_23771	1.76085	0.00056099	SCNN1B	uc002dln.3	6e-12	Human
dd_Smed_v4_9584	1.75223	0.021862	clone SMED_31833_V2 follistatin	JX010480.1	0	Smed
dd_Smed_v4_9204	1.74734	0.0327486	NA	NA	NA	NA
dd_Smed_v4_13154	1.74484	0.0317691	NA	NA	NA	NA
dd_Smed_v4_25969	1.73698	0.015723	NA	NA	NA	NA
dd_Smed_v4_8504	1.72995	3.24399e-08	netrin 1 (NTN1)	uc002glw.4	5e-103	Human
dd_Smed_v4_9584	1.72577	1.13454e-05	clone SMED_31833_V2 follistatin	JX010480.1	0	Smed
dd_Smed_v4_50035	1.70931	0.00913631	kinesin family member 12 (KIF12)	uc004bif.3	4e-62	Human
dd_Smed_v4_17072	1.70821	0.0279501	KCNA3	uc001dzv.1	7e-29	Human
dd_Smed_v4_17352	1.66106	0.00609918	iroquois homeobox 6 (IRX6)	uc002ehx.3	2e-38	Human
dd_Smed_v4_24722	1.6601	0.0111825	NA	NA	NA	NA
dd_Smed_v4_17154	1.65871	0.00116087	protein kinase, cAMP-dependent, catalytic, beta (PRKACB)	uc001djj.3	1e-180	Human
dd_Smed_v4_10555	1.65654	3.24399e-08	NA	NA	NA	NA
dd_Smed_v4_2493	1.65285	8.9976e-06	echinoderm microtubule associated protein like 1 (EML1)	uc001ygr.3	0	Human
dd_Smed_v4_7063	1.65008	1.51667e-06	patched-like protein	GQ337475.1	0	Smed
dd_Smed_v4_5057	1.65001	2.48964e-05	NA	NA	NA	NA
dd_Smed_v4_12010	1.64645	0.000539778	ovo-like 1(Drosophila) (OVOL1)	uc001ofq.3	2e-50	Human
dd_Smed_v4_5242	1.63114	0.000125068	GalNAc-T10	uc003lvh.3	7e-171	Human
dd_Smed_v4_4284	1.62465	1.10621e-07	NA	uc004amo.1	1e-55	Human
dd_Smed_v4_15482	1.59347	0.0142676	NA	NA	NA	NA
dd_Smed_v4_7030	1.58643	9.42463e-06	NA	NA	NA	NA
dd_Smed_v4_13975	1.58599	6.62399e-07	PKD1L-2 (PKD1L-2)	KT163775.1	0	Smed
dd_Smed_v4_9747	1.58393	0.00940814	NA	NA	NA	NA
dd_Smed_v4_11650	1.57992	0.00615402	frizzled receptor-like protein (Frz-d)	EU130789.1	0	Smed
dd_Smed_v4_16483	1.57962	3.35769e-05	EPH receptor A4 (EPHA4)	uc010zlm.1	1e-114	Human
dd_Smed_v4_6034	1.57829	9.76499e-05	NA	NA	NA	NA
dd_Smed_v4_17402	1.57244	0.00582906	BMP	EF633689.1	0	Smed
dd_Smed_v4_16438	1.57215	0.0123663	NA	NA	NA	NA
dd_Smed_v4_39721	1.54773	0.0094563	dynein, axonemal, intermediate chain 1 (DNAI1)	uc003zum.3	1e-51	Human
dd_Smed_v4_15181	1.53838	0.00266037	protocadherin 11 Y-linked (PCDH11Y)a	uc010nwg.1	1e-75	Human
dd_Smed_v4_29263	1.53302	0.00188307	NA	NA	NA	NA
dd_Smed_v4_8804	1.53166	0.000104021	NA	NA	NA	NA
dd_Smed_v4_3381	1.52311	1.62731e-05	titin (TTN)IC	uc002umz.1	7e-25	Human
dd_Smed_v4_7063	1.51719	0.000156488	patched-like protein	GQ337475.1	0	Smed
dd_Smed_v4_8804	1.5164	0.00136106	NA	NA	NA	NA
dd_Smed_v4_10791	1.51574	0.0354363	FOXRED1	uc010sbr.2	3e-105	Human
dd_Smed_v4_22585	1.51379	0.00189913	zinc finger protein A (ZicA)	KF751216.1	0	Smed
dd_Smed_v4_20159	1.50414	0.0135476	doublecortin domain containing 2 (DCDC2)	uc003ndy.3	5e-27	Human
dd_Smed_v4_12038	1.50355	0.00568861	NA	NA	NA	NA
dd_Smed_v4_19076	1.50077	0.00883887	NA	NA	NA	NA
dd_Smed_v4_10150	1.49663	0.0319489	NA	NA	NA	NA
dd_Smed_v4_8804	1.48971	0.000455417	NA	NA	NA	NA
dd_Smed_v4_9196	1.48721	0.00388962	NA	NA	NA	NA
dd_Smed_v4_13570	1.48194	0.00226098	FAT atypical cadherin 4 (FAT4)	uc003ifj.4	3e-58	Human
dd_Smed_v4_29517	1.48022	0.0179312	ankyrin 3, node of Ranvier (ankyrin G) (ANK3)	uc001jkz.4	1e-92	Human
dd_Smed_v4_19322	1.47627	0.0116991	PKD2L-1 (PKD2L-1)	KT163781.1	0	Smed
dd_Smed_v4_10730	1.47469	0.00170516	unc-5 homolog C (C. elegans) (UNC5C)	uc003hto.3	1e-91	Human
dd_Smed_v4_13474	1.47366	0.0330005	AT rich interactive domain 3C (BRIGHT-like) (ARID3C)	uc011lon.2	9e-69	Human
dd_Smed_v4_12269	1.47245	0.000213179	NA	NA	NA	NA
dd_Smed_v4_39713	1.47112	0.00955529	lipoxygenase homology domains 1 (LOXHD1)	uc010xcw.1	1e-14	Human
dd_Smed_v4_6254	1.4679	0.00388962	phosphoglycerate dehydrogenase (PHGDH)	uc001ehz.3	8e-110	Human
dd_Smed_v4_15217	1.46706	0.0202142	KCNC1B	uc001mnk.4	3e-55	Human
dd_Smed_v4_12182	1.46681	0.0208011	NA	uc001zft.3	1e-116	Human
dd_Smed_v4_20556	1.46546	0.012923	protocadherin 11 X-linked (PCDH11X)b	uc004efh.2	2e-43	Human
dd_Smed_v4_10237	1.45465	0.0081274	unc-51-like kinase 1 (C. elegans) (ULK1)	uc001uje.3	5e-77	Human
dd_Smed_v4_13071	1.44884	0.00506933	CSMD-like protein (CSMD)	KT983974.1	0	Smed
dd_Smed_v4_12208	1.44593	0.000776342	NA	NA	NA	NA
dd_Smed_v4_9230	1.44576	0.00091943	FERM domain containing 5 (FRMD5)	uc001ztl.3	8e-40	Human
dd_Smed_v4_15626	1.44515	0.00101351	PKD2L-1 (PKD2L-1)	KT163781.1	0	Smed
dd_Smed_v4_18385	1.44451	0.0107185	SCNN1A	uc001qnx.3	1e-08	Human
dd_Smed_v4_22398	1.43837	0.0468378	cyclic nucleotide gated channel alpha 3 (CNGA3)	uc002syu.3	0	Human
dd_Smed_v4_11681	1.43452	0.00492594	collagen beta(1-O)galactosyltransferase 2 (COLGALT2)	uc001gqr.3	5e-98	Human
dd_Smed_v4_8806	1.43311	0.00353972	kinesin light chain 1 (KLC1)	uc001ynm.1	5e-159	Human
dd_Smed_v4_7632	1.4331	0.0299757	PIP5K1C	uc010xhq.2	2e-111	Human
dd_Smed_v4_15272	1.4324	0.00174202	FAM115C	uc003wdi.2	8e-39	Human
dd_Smed_v4_1970	1.43117	0.0432976	neurocalcin delta (NCALD)7	uc003ykl.3	1e-48	Human
dd_Smed_v4_8489	1.42884	0.0106189	formin binding protein 1 (FNBP1)	uc011mbw.1	4e-11	Human
dd_Smed_v4_12208	1.42835	0.00208362	NA	NA	NA	NA
dd_Smed_v4_7144	1.427	0.0349049	L-3-hydroxyproline dehydratase (trans-) (L3HYPDH)	uc001xee.1	9e-67	Human
dd_Smed_v4_14018	1.42631	0.0122497	NA	NA	NA	NA
dd_Smed_v4_8806	1.42628	0.00363636	kinesin light chain 1 (KLC1)	uc001ynm.1	5e-159	Human
dd_Smed_v4_9677	1.42614	0.00439239	protocadherin 11 Y-linked (PCDH11Y)a	uc010nwg.1	2e-66	Human
dd_Smed_v4_7545	1.42447	0.0280399	hemicentin 1 (HMCN1)	uc001grq.1	4e-46	Human
dd_Smed_v4_10613	1.42345	0.00878168	SV2 related protein homolog (rat) (SVOP)	uc010sxh.1	6e-67	Human
dd_Smed_v4_12595	1.42079	0.0052445	tripartite motif containing 9 (TRIM9)	uc001wyx.4	1e-123	Human
dd_Smed_v4_3381	1.41747	0.00116042	titin (TTN)IC	uc002umz.1	7e-25	Human
dd_Smed_v4_12229	1.41745	0.00682198	nuclear receptor subfamily 4, group A, member 1 (NR4A1)	uc001rzt.3	1e-50	Human
dd_Smed_v4_4752	1.41604	0.00102009	NA	uc002fkd.3	7e-94	Human
dd_Smed_v4_6746	1.41509	0.0092338	Kallmann syndrome 1 sequence (KAL1)	uc004csf.3	6e-38	Human
dd_Smed_v4_12407	1.41406	0.0148039	KCND3	uc001ebv.1	5e-157	Human
dd_Smed_v4_9120	1.41379	0.0114501	family with sequence similarity 115, member C (FAM115C)	uc003wdi.2	3e-23	Human
dd_Smed_v4_6048	1.41347	0.0105335	glutamine rich 2 (QRICH2)	uc010dgw.1	2e-35	Human
dd_Smed_v4_8959	1.41121	0.00413543	NA	NA	NA	NA
dd_Smed_v4_9230	1.40726	0.00325106	FERM domain containing 5 (FRMD5)	uc001ztl.3	8e-40	Human
dd_Smed_v4_9009	1.40617	0.00173416	dynein, axonemal, heavy chain 3 (DNAH3)	uc010vbe.2	0	Human
dd_Smed_v4_6182	1.40505	0.0327486	lipoma HMGIC fusion partner (LHFP)	uc001uxf.3	4e-16	Human
dd_Smed_v4_9009	1.40462	0.00157119	dynein, axonemal, heavy chain 3 (DNAH3)	uc010vbe.2	0	Human
dd_Smed_v4_12674	1.40453	0.0313851	Smed-NDK-4	GU592831.1	0	Smed
dd_Smed_v4_7614	1.40401	0.0091829	NA	NA	NA	NA
dd_Smed_v4_16808	1.39822	0.00315906	NA	uc021vsz.1	7e-07	Human
dd_Smed_v4_3418	1.39693	0.00150724	NA	NA	NA	NA
dd_Smed_v4_1772	1.39684	0.00103576	ATP2A2b	uc001tqk.4	0	Human
dd_Smed_v4_6048	1.3953	0.00609918	glutamine rich 2 (QRICH2)	uc010dgw.1	2e-35	Human
dd_Smed_v4_12674	1.394	0.0377743	Smed-NDK-4	GU592831.1	0	Smed
dd_Smed_v4_2493	1.39397	0.00245526	echinoderm microtubule associated protein like 1 (EML1)	uc001ygr.3	0	Human
dd_Smed_v4_6048	1.39334	0.00678953	glutamine rich 2 (QRICH2)	uc010dgw.1	2e-35	Human
dd_Smed_v4_2493	1.38911	0.00272172	echinoderm microtubule associated protein like 1 (EML1)	uc001ygr.3	0	Human
dd_Smed_v4_12629	1.3891	0.00682281	NA	NA	NA	NA
dd_Smed_v4_5037	1.38906	0.00725028	Smed08080_V2 four and a half LIM domains-1	JX010593.1	0	Smed
dd_Smed_v4_508	1.38693	0.0043886	tubulin, alpha 3d (TUBA3D)	uc002tsu.4	0	Human
dd_Smed_v4_508	1.38531	0.0047544	tubulin, alpha 3d (TUBA3D)	uc002tsu.4	0	Human
dd_Smed_v4_15531	1.37925	0.0196344	zinc finger protein of the cerebellum 2 (zic-2)	KT983964.1	0	Smed
dd_Smed_v4_12674	1.37921	0.042081	Smed-NDK-4	GU592831.1	0	Smed
dd_Smed_v4_10730	1.37752	0.026489	unc-5 homolog C (C. elegans) (UNC5C)	uc003hto.3	1e-91	Human
dd_Smed_v4_5781	1.3775	0.0342357	5F04 PDZ ring finger protein 4	KJ573357.1	0	Smed
dd_Smed_v4_181	1.37306	0.00353972	aminopeptidase-like 1 (NPEPL1)	uc010zzr.2	8e-17	Human
dd_Smed_v4_508	1.36839	0.00874508	tubulin, alpha 3d (TUBA3D)	uc002tsu.4	0	Human
dd_Smed_v4_6597	1.36446	0.00904772	slc23a-1 (slc23a-1)	KT163610.1	0	Smed
dd_Smed_v4_3527	1.36326	0.00615402	heparan sulfate proteoglycan 2 (HSPG2)	uc001bfj.3	1e-25	Human
dd_Smed_v4_13399	1.36303	0.0092338	glutamate receptor, ionotropic, AMPA 1 (GRIA1)	uc003luz.4	8e-129	Human
dd_Smed_v4_8690	1.36287	0.0111304	leucine rich repeat containing 4 (LRRC4)	uc022akv.1	4e-10	Human
dd_Smed_v4_10734	1.36036	0.00742491	regulating synaptic membrane exocytosis 2 (RIMS2)	uc003ylr.3	2e-54	Human
dd_Smed_v4_19860	1.35314	0.0393691	FAT atypical cadherin 4 (FAT4)	uc011cgp.2	3e-55	Human
dd_Smed_v4_14162	1.34916	0.0462404	otoferlin (OTOF)	uc002rhk.3	6e-179	Human
dd_Smed_v4_8833	1.34827	0.0107185	ADAMTS-like 1 (ADAMTSL1)	uc003zne.4	8e-16	Human
dd_Smed_v4_2072	1.34421	0.0395028	ankyrin 2, neuronal (ANK2)	uc003ibc.2	0	Human
dd_Smed_v4_11502	1.34235	0.039329	NA	NA	NA	NA
dd_Smed_v4_508	1.33803	0.0218174	tubulin, alpha 3d (TUBA3D)	uc002tsu.4	0	Human
dd_Smed_v4_11744	1.32879	0.0203378	dachsous 1 (Drosophila) (DCHS1)	uc001mem.1	5e-82	Human
dd_Smed_v4_6809	1.32684	0.026489	anoctamin 8 (ANO8)	uc002ngf.2	5e-112	Human
dd_Smed_v4_718	1.32391	0.0215922	tubulin, alpha 1b (TUBA1B)	uc001rtl.3	0	Human
dd_Smed_v4_9407	1.32122	0.0393691	NA	NA	NA	NA
dd_Smed_v4_2337	1.32115	0.0138781	collagen, type IV, alpha 6 (COL4A6)A	uc004enw.4	9e-50	Human
dd_Smed_v4_2688	1.31985	0.0148073	beta-catenin-1	EU296629.1	0	Smed
dd_Smed_v4_2928	1.31542	0.033686	NA	uc021vta.1	7e-23	Human
dd_Smed_v4_6958	1.31517	0.0295754	laeverin (AQPEP)	uc003kro.3	7e-78	Human
dd_Smed_v4_11823	1.31481	0.0347191	frizzled-5/8-4 (fz5/8-4)	KT983962.1	0	Smed
dd_Smed_v4_3527	1.31099	0.0400386	heparan sulfate proteoglycan 2 (HSPG2)	uc001bfj.3	1e-25	Human
dd_Smed_v4_6524	1.3034	0.0405724	NA	NA	NA	NA
dd_Smed_v4_2197	1.2969	0.0320398	collagen, type XXIV, alpha 1 (COL24A1)	uc001dlj.3	4e-61	Human
dd_Smed_v4_2922	1.29454	0.0345561	ARHGEF17	uc001otu.3	4e-54	Human
dd_Smed_v4_5635	1.2904	0.0484947	FYN oncogene related to SRC, FGR, YES (FYN)	uc003pvk.3	3e-167	Human

## Sheet: SF1B
Supplementary file 1B. Anterior-pole-enriched genes in anterior blastema of 72hpa trunks.
Genes with padj<0.05 sorted by foldChange
Anterior pole markers are highlighted
Contig ID	foldChange	padj	Best-blast hit	ID	E-Value	Organism
dd_Smed_v4_24180	19.2104	1.89763e-10	notum	JF725701.1	0	Smed
dd_Smed_v4_93315	17.9187	1.24185e-20	NA	NA	NA	NA
dd_Smed_v4_43060	16.2861	0.00170979	RNGTT	uc011dzu.1	7e-28	Human
dd_Smed_v4_16070	13.0728	8.82085e-10	1G06 musculin	KJ573365.1	0	Smed
dd_Smed_v4_49372	8.95841	3.73284e-07	dynein, axonemal, heavy chain 10 (DNAH10)	uc001uft.4	2e-79	Human
dd_Smed_v4_8201	8.89927	5.96929e-16	dynein, axonemal, heavy chain 10 (DNAH10)	uc001uft.4	0	Human
dd_Smed_v4_39545	7.72396	3.99915e-16	EPH receptor A2 (EPHA2)	uc010oca.2	2e-37	Human
dd_Smed_v4_22630	7.53531	4.69171e-17	NA	NA	NA	NA
dd_Smed_v4_13985	7.29001	4.59565e-20	hypothetical protein Smed-sfrp1	KY348681.1	0	Smed
dd_Smed_v4_33384	6.88543	6.60258e-08	macrophage expressed 1 (MPEG1)	uc001nnu.4	8e-114	Human
dd_Smed_v4_27668	6.71063	2.10874e-16	EPH receptor B1 (EPHB1)	uc003equ.3	5e-60	Human
dd_Smed_v4_23249	6.2213	9.21967e-11	winged helix/forkhead transcription factor (foxd)	KC577557.1	0	Smed
dd_Smed_v4_13188	6.19595	1.24185e-20	Kallmann syndrome 1 sequence (KAL1)	uc004csf.3	8e-22	Human
dd_Smed_v4_8829	5.75267	1.39473e-05	phosphogluconate dehydrogenase (PGD)	uc001arc.3	0	Human
dd_Smed_v4_811	5.64557	0.0393687	NA	NA	NA	NA
dd_Smed_v4_23400	5.38382	0.0177094	NA	NA	NA	NA
dd_Smed_v4_35379	4.98246	4.67189e-14	ISL LIM homeobox 2 (ISL2)	uc002bbw.1	8e-22	Human
dd_Smed_v4_20026	4.85114	5.09623e-12	NA	NA	NA	NA
dd_Smed_v4_23030	4.79826	2.40943e-10	NA	NA	NA	NA
dd_Smed_v4_13875	4.79707	1.03882e-15	NA	NA	NA	NA
dd_Smed_v4_26780	4.77713	3.14312e-12	NA	NA	NA	NA
dd_Smed_v4_8371	4.52978	6.09703e-13	PRKACA	uc002myc.3	2e-168	Human
dd_Smed_v4_17397	3.74171	8.11487e-05	ptf-1 protein (ptf-1)	KF487101.1	4.97e-137	Smed
dd_Smed_v4_22615	3.43904	0.00248363	ASNS5	uc003uox.4	6e-11	Human
dd_Smed_v4_25387	3.10389	0.0253513	hypothetical protein Smed-asns	KY348648.1	0	Smed
dd_Smed_v4_12674	3.02631	1.65125e-09	Smed-NDK-4	GU592831.1	0	Smed
dd_Smed_v4_12674	3.01337	2.27209e-09	Smed-NDK-4	GU592831.1	0	Smed
dd_Smed_v4_22585	2.91838	3.19741e-08	zinc finger protein A (ZicA)	KF751216.1	0	Smed
dd_Smed_v4_12674	2.8496	1.50355e-08	Smed-NDK-4	GU592831.1	0	Smed
dd_Smed_v4_28401	2.81577	0.0144983	NA	NA	NA	NA
dd_Smed_v4_16571	2.76772	3.44485e-08	hypothetical protein Smed-fzd-5/8-3	KY348663.1	0	Smed
dd_Smed_v4_42614	2.7516	0.0342977	NA	NA	NA	NA
dd_Smed_v4_33456	2.65087	6.84245e-05	NK2 homeobox 4 (NKX2-4)	uc010gcz.3	2e-26	Human
dd_Smed_v4_19933	2.58791	0.000601396	NA	NA	NA	NA
dd_Smed_v4_10673	2.57214	1.39402e-06	ovo-like 1(Drosophila) (OVOL1)	uc001ofq.3	2e-48	Human
dd_Smed_v4_9910	2.47624	6.11893e-05	GATA456-2	KX827244.1	0	Smed
dd_Smed_v4_9584	2.43705	1.17053e-05	follistatin	JX010480.1	0	Smed
dd_Smed_v4_30210	2.31878	0.000989598	NA	NA	NA	NA
dd_Smed_v4_6222	2.30091	0.00513488	epidermal growth factor Smed-egf-6	KU850493.1	0	Smed
dd_Smed_v4_9584	2.27013	0.000272327	clone SMED_31833_V2 follistatin	JX010480.1	0	Smed
dd_Smed_v4_18393	2.26176	0.00573249	unc-5 homolog B (C. elegans) (UNC5B)	uc001jro.3	3e-37	Human
dd_Smed_v4_18393	2.25821	0.0054999	unc-5 homolog B (C. elegans) (UNC5B)	uc001jro.3	3e-37	Human
dd_Smed_v4_44405	2.25141	0.0246418	NA	NA	NA	NA
dd_Smed_v4_13071	2.24682	0.000597692	CSMD-like protein (CSMD)	KT983974.1	0	Smed
dd_Smed_v4_31236	2.24102	0.0212432	frizzled family receptor 5 (FZD5)	uc021vvr.1	2e-50	Human
dd_Smed_v4_15506	2.23874	0.00726594	snail-1	KY964486.1	0	Smed
dd_Smed_v4_9584	2.22007	0.0152002	clone SMED_31833_V2 follistatin	JX010480.1	0	Smed
dd_Smed_v4_29263	2.20567	0.0001583	NA	NA	NA	NA
dd_Smed_v4_13823	2.19986	0.000155401	delta-like 1 (Drosophila) (DLL1)	uc003qxm.3	2e-84	Human
dd_Smed_v4_12943	2.19478	0.0010036	FGD4	uc001rkz.3	5e-11	Human
dd_Smed_v4_8804	2.14794	0.000189327	NA	NA	NA	NA
dd_Smed_v4_18393	2.12704	0.0146541	unc-5 homolog B (C. elegans) (UNC5B)	uc001jro.3	3e-37	Human
dd_Smed_v4_47123	2.1116	0.00696583	arrowhead	KY024326.1	0	Smed
dd_Smed_v4_10732	2.10452	0.000473681	BCKDHA	uc002oqq.3	2e-132	Human
dd_Smed_v4_1312	2.0808	0.0414418	NA	NA	NA	NA
dd_Smed_v4_15691	2.06786	0.00677505	SMPDL3B	uc001bpg.3	1e-53	Human
dd_Smed_v4_17154	2.0636	0.00352505	PRKACB	uc001djj.3	1e-180	Human
dd_Smed_v4_9120	2.06046	0.00248648	FAM115C	uc003wdi.2	3e-23	Human
dd_Smed_v4_12111	2.0469	0.0395702	slit1	DQ336176.3	0	Smed
dd_Smed_v4_8804	2.03979	0.000880813	NA	NA	NA	NA
dd_Smed_v4_8804	2.02667	0.001511	NA	NA	NA	NA
dd_Smed_v4_12229	1.95319	0.00269076	NR4A1	uc001rzt.3	1e-50	Human
dd_Smed_v4_15531	1.94128	0.00707313	zinc finger protein of the cerebellum 2 (zic-2)	KT983964.1	0	Smed
dd_Smed_v4_8729	1.93763	0.00526527	NA	NA	NA	NA
dd_Smed_v4_11823	1.9338	0.00218544	frizzled-5/8-4 (fz5/8-4)	KT983962.1	0	Smed
dd_Smed_v4_4311	1.9285	0.00839347	NA	NA	NA	NA
dd_Smed_v4_9825	1.9243	0.00494281	NA	NA	NA	NA
dd_Smed_v4_15531	1.90988	0.00439521	zinc finger protein of the cerebellum 2 (zic-2)	KT983964.1	0	Smed
dd_Smed_v4_11681	1.89778	0.0322218	COLGALT2	uc001gqr.3	5e-98	Human
dd_Smed_v4_9485	1.89092	0.00450234	transaldolase 1 (TALDO1)	uc001lqz.3	2e-119	Human
dd_Smed_v4_7063	1.86855	0.00935967	patched-like protein	GQ337475.1	0	Smed
dd_Smed_v4_10716	1.85217	0.0086908	notch 1 (NOTCH1)	uc004chz.3	8e-57	Human
dd_Smed_v4_13867	1.82393	0.022102	NA	NA	NA	NA
dd_Smed_v4_28209	1.8209	0.0293101	NA	NA	NA	NA
dd_Smed_v4_15423	1.82074	0.0291263	noggin 1	EF633690.1	0	Smed
dd_Smed_v4_11070	1.80806	0.0138137	secreted frizzled related protein 3	HM751832.1	0	Smed
dd_Smed_v4_17168	1.79926	0.0329622	hypothetical protein Smed-fzd-5/8-2	KY348662.1	0	Smed
dd_Smed_v4_14635	1.78838	0.0417356	forkhead box J1-like protein 1	JX842843.1	0	Smed
dd_Smed_v4_7063	1.78217	0.0230411	patched-like protein	GQ337475.1	0	Smed
dd_Smed_v4_4267	1.77411	0.0320428	glutamate receptor, ionotropic, kainate 3 (GRIK3)	uc001caz.2	2e-146	Human
dd_Smed_v4_4267	1.77052	0.0329622	glutamate receptor, ionotropic, kainate 3 (GRIK3)	uc001caz.2	2e-146	Human
dd_Smed_v4_12182	1.76825	0.0391556	NA	uc001zft.3	1e-116	Human
dd_Smed_v4_9677	1.75849	0.0216895	protocadherin 11 Y-linked (PCDH11Y)a	uc010nwg.1	2e-66	Human
dd_Smed_v4_2507	1.75647	0.0278621	LPPR5	uc001dsb.3	6e-12	Human
dd_Smed_v4_13570	1.70097	0.0469487	FAT atypical cadherin 4 (FAT4)	uc003ifj.4	3e-58	Human
dd_Smed_v4_8606	1.69462	0.0426178	strain AAA-1 PREP homeodomain-like protein (prep)	GU290186.1	0	Smed

## Sheet: SF1C
Supplementary file 1C. Posterior-pole-enriched genes from single-cell sequencing.
Genes with Z>1.96 ranked by mle (maximum likelihood of expression)
Contig ID	mle	Z	Best-blast hit	ID	E-Value	Organism
dd_Smed_v4_28398	9.05129	7.16081	wntP-1 (wntP-1)	EU296630.1	0	Smed
dd_Smed_v4_23400	8.52791	7.16081	NA	NA	NA	NA
dd_Smed_v4_16466	6.61914	7.16074	NA	uc001wqe.3	5e-36	Human
dd_Smed_v4_15253	7.38881	7.15737	pitx	KF134113.1	0	Smed
dd_Smed_v4_13943	7.11173	7.09043	ASIC5	uc003ipe.1	5e-15	Human
dd_Smed_v4_8860	5.3261	7.01362	kinesin family member 26A (KIF26A)	uc001yos.4	2e-41	Human
dd_Smed_v4_6182	6.46521	6.95269	lipoma HMGIC fusion partner (LHFP)	uc001uxf.3	4e-16	Human
dd_Smed_v4_16466	5.7879	6.70402	NA	uc001wqe.3	5e-36	Human
dd_Smed_v4_14613	6.34206	6.53996	protocadherin 9 (PCDH9)	uc001vin.3	9e-71	Human
dd_Smed_v4_16650	5.91104	6.44542	NA	NA	NA	NA
dd_Smed_v4_6508	5.51082	6.16652	TBC1D30	uc001ssi.2	1e-136	Human
dd_Smed_v4_1230	5.0798	6.14889	SCGN	uc003nfb.3	4e-64	Human
dd_Smed_v4_18843	5.38767	5.90564	CUBN	uc001ioo.3	5e-19	Human
dd_Smed_v4_10673	5.94183	5.86254	ovo-like 1(Drosophila) (OVOL1)	uc001ofq.3	2e-48	Human
dd_Smed_v4_20026	5.26452	5.62206	NA	NA	NA	NA
dd_Smed_v4_15516	5.04902	5.28927	otxb-like	KJ934809.1	0	Smed
dd_Smed_v4_15362	4.77194	5.26399	protocadherin 11 Y-linked (PCDH11Y)a	uc004fqm.1	3e-54	Human
dd_Smed_v4_8130	4.24856	4.77201	cyclin G1 (CCNG1)	uc003lzb.3	2e-12	Human
dd_Smed_v4_13188	4.49486	4.44819	Kallmann syndrome 1 sequence (KAL1)	uc004csf.3	8e-22	Human
dd_Smed_v4_13205	4.37171	4.37409	CALM2	uc002rvt.2	2e-19	Human
dd_Smed_v4_14161	4.43328	4.2904	NA	NA	NA	NA
dd_Smed_v4_11409	3.72519	4.28215	netrin receptor-like protein (netR)	DQ086493.1	0	Smed
dd_Smed_v4_10911	5.81868	4.26915	zinc finger protein 596 (ZNF596)	uc003wow.3	2e-16	Human
dd_Smed_v4_5133	4.18699	4.1975	1020HH-1 protein	GU295180.1	0	Smed
dd_Smed_v4_21755	5.41846	4.06425	NA	NA	NA	NA
dd_Smed_v4_11827	3.72519	3.85037	NA	NA	NA	NA
dd_Smed_v4_11876	3.38654	3.8354	jagged 1 (JAG1)	uc002wnw.2	0	Human
dd_Smed_v4_17402	3.81755	3.80514	BMP	EF633689.1	0	Smed
dd_Smed_v4_13823	4.21778	3.79745	delta-like 1 (Drosophila) (DLL1)	uc003qxm.3	2e-84	Human
dd_Smed_v4_8820	4.618	3.77945	insulin gene enhancer protein isl-1 (islet1)	KC568454.1	0	Smed
dd_Smed_v4_10730	3.41732	3.70747	unc-5 homolog C (C. elegans) (UNC5C)	uc003hto.3	1e-91	Human
dd_Smed_v4_18393	3.26339	3.63023	unc-5 homolog B (C. elegans) (UNC5B)	uc001jro.3	3e-37	Human
dd_Smed_v4_17288	5.60318	3.55701	NA	NA	NA	NA
dd_Smed_v4_16202	3.97148	3.52668	NA	NA	NA	NA
dd_Smed_v4_12432	3.90991	3.51687	DDR2	uc001gcg.3	3e-34	Human
dd_Smed_v4_2738	3.87912	3.47466	pyruvate kinase, muscle (PKM)7	uc010bit.1	0	Human
dd_Smed_v4_2492	3.97148	3.46423	KLKB1	uc011clc.2	4e-56	Human
dd_Smed_v4_7930	4.21778	3.46304	protocadherin 9 (PCDH9)	uc010thl.2	3e-45	Human
dd_Smed_v4_2511	3.90991	3.2414	NA	NA	NA	NA
dd_Smed_v4_50225	3.90991	3.17481	GCR143 (gcr143)	KX018939.1	0	Smed
dd_Smed_v4_10545	3.90991	3.14202	NA	NA	NA	NA
dd_Smed_v4_7392	3.0171	3.13784	NDUFAF5	uc002wom.3	2e-96	Human
dd_Smed_v4_9547	3.26339	3.1176	RAPGEF4	uc002uhv.4	0	Human
dd_Smed_v4_59018	4.49486	3.10274	GCR143 (gcr143)	KX018939.1	0	Smed
dd_Smed_v4_7195	2.49372	3.05348	deleted in colorectal carcinoma (DCC)	uc010xdr.1	6e-25	Human
dd_Smed_v4_3391	2.61687	3.04837	NPHS1-7 (NPHS1-7)	KT163773.1	0	Smed
dd_Smed_v4_90059	3.04788	3.033	NA	NA	NA	NA
dd_Smed_v4_3187	3.57126	3.02749	tektin 3 (TEKT3)	uc002gon.3	1e-128	Human
dd_Smed_v4_100368	2.58608	2.99795	NA	NA	NA	NA
dd_Smed_v4_9208	3.0171	2.99143	ABCC2	uc001kqf.2	0	Human
dd_Smed_v4_8167	2.83238	2.97222	ankyrin repeat domain 50 (ANKRD50)	uc011cgo.2	6e-09	Human
dd_Smed_v4_9584	3.9407	2.96333	clone SMED_31833_V2 follistatin	JX010480.1	0	Smed
dd_Smed_v4_68282	2.80159	2.92629	NA	NA	NA	NA
dd_Smed_v4_7482	3.57126	2.91873	PIGB	uc002act.3	1e-99	Human
dd_Smed_v4_13603	4.34092	2.88883	NA	NA	NA	NA
dd_Smed_v4_18505	3.57126	2.83792	msh1 protein	AM293346.1	0	Smed
dd_Smed_v4_4172	2.37058	2.83116	NLK-1	JQ425157.1	0	Smed
dd_Smed_v4_15499	4.4025	2.80848	calcitonin receptor (CALCR)	uc003umw.2	8e-22	Human
dd_Smed_v4_2407	3.04788	2.79494	G protein-coupled receptor 158 (GPR158)	uc001isj.3	3e-12	Human
dd_Smed_v4_81840	2.92474	2.79342	NA	NA	NA	NA
dd_Smed_v4_1040	2.92474	2.79108	NA	NA	NA	NA
dd_Smed_v4_6981	4.95666	2.7443	NA	uc009znz.3	4e-22	Human
dd_Smed_v4_27499	3.57126	2.74377	neuromedin U receptor 2 (NMUR2)	uc003luv.2	2e-45	Human
dd_Smed_v4_11024	2.43215	2.73112	FGFR4	JQ425159.1	0	Smed
dd_Smed_v4_9602	2.92474	2.72585	LRFN4	uc001ojq.1	5e-10	Human
dd_Smed_v4_3627	3.60204	2.69193	INPP5K	uc002fsr.3	5e-53	Human
dd_Smed_v4_26059	2.98631	2.65743	NA	NA	NA	NA
dd_Smed_v4_7345	3.81755	2.62855	IQ motif containing E (IQCE)	uc011jvz.1	4e-09	Human
dd_Smed_v4_25503	3.0171	2.58415	NA	NA	NA	NA
dd_Smed_v4_23806	3.04788	2.58128	NA	NA	NA	NA
dd_Smed_v4_11533	3.4789	2.55329	slit homolog 2 (Drosophila) (SLIT2)	uc003gpr.1	4e-07	Human
dd_Smed_v4_6306	2.67844	2.53895	transmembrane protein 259 (TMEM259)	uc002lqr.1	9e-104	Human
dd_Smed_v4_7243	3.81755	2.5228	synaptotagmin XI (SYT11)	uc001fmg.3	2e-80	Human
dd_Smed_v4_11241	3.57126	2.51974	C6orf211	uc003qok.1	2e-64	Human
dd_Smed_v4_9658	3.38654	2.51962	NA	NA	NA	NA
dd_Smed_v4_12634	2.43215	2.50293	MyoD-like protein	AF414355.1	0	Smed
dd_Smed_v4_6719	3.41732	2.49533	phospholipase C, gamma 1 (PLCG1)	uc002xjo.1	5e-114	Human
dd_Smed_v4_32635	4.18699	2.45458	NA	NA	NA	NA
dd_Smed_v4_12759	3.50968	2.44879	oxysterol binding protein-like 2 (OSBPL2)	uc002ycl.1	2e-91	Human
dd_Smed_v4_12423	2.70923	2.42682	NA	NA	NA	NA
dd_Smed_v4_5680	2.18586	2.42589	NA	uc002vny.2	0	Human
dd_Smed_v4_3754	3.81755	2.42361	engulfment and cell motility 2 (ELMO2)	uc010zxq.1	2e-26	Human
dd_Smed_v4_12828	2.61687	2.41919	SHD	uc002lzw.2	5e-16	Human
dd_Smed_v4_5181	2.61687	2.41331	TBC1 domain family, member 5 (TBC1D5)	uc003cbe.3	2e-98	Human
dd_Smed_v4_33278	4.49486	2.40164	NA	NA	NA	NA
dd_Smed_v4_8729	3.63283	2.39403	NA	NA	NA	NA
dd_Smed_v4_37672	2.89395	2.39107	NA	NA	NA	NA
dd_Smed_v4_4381	3.10946	2.39083	NA	NA	NA	NA
dd_Smed_v4_7862	3.57126	2.38631	NA	uc003bne.1	1e-91	Human
dd_Smed_v4_17743	3.9407	2.38553	IGSF9	uc001fur.2	1e-44	Human
dd_Smed_v4_12771	3.35575	2.38517	PTPRD	uc003zkk.3	6e-107	Human
dd_Smed_v4_13743	2.67844	2.35302	NA	NA	NA	NA
dd_Smed_v4_80809	3.10946	2.35126	NA	NA	NA	NA
dd_Smed_v4_25158	4.52564	2.34717	hypothetical protein Smed-wif-like protein	KY348685.1	0	Smed
dd_Smed_v4_13372	2.64766	2.33974	NA	NA	NA	NA
dd_Smed_v4_5396	2.03192	2.33374	mutated in colorectal cancers (MCC)	uc003kql.4	2e-24	Human
dd_Smed_v4_4585	2.67844	2.31913	NA	NA	NA	NA
dd_Smed_v4_52794	2.95552	2.31549	NA	NA	NA	NA
dd_Smed_v4_10295	2.18586	2.31424	NA	NA	NA	NA
dd_Smed_v4_11640	3.54047	2.31326	NA	NA	NA	NA
dd_Smed_v4_11236	2.67844	2.31282	GCR006 (gcr006)	KX018827.1	0	Smed
dd_Smed_v4_5062	1.90877	2.30583	NA	NA	NA	NA
dd_Smed_v4_21713	2.58608	2.29395	NA	uc003kuf.3	1e-12	Human
dd_Smed_v4_17675	2.06271	2.29346	NA	NA	NA	NA
dd_Smed_v4_3879	2.0935	2.28738	NA	NA	NA	NA
dd_Smed_v4_13944	3.0171	2.28453	SCL/TAL1 interrupting locus (STIL)	uc001cre.1	4e-13	Human
dd_Smed_v4_15781	2.86316	2.27916	NA	NA	NA	NA
dd_Smed_v4_21082	2.89395	2.27849	GCR083 (gcr083)	KX018889.1	0	Smed
dd_Smed_v4_9830	3.81755	2.27252	NA	NA	NA	NA
dd_Smed_v4_10404	3.63283	2.27092	ribonuclease H2, subunit A (RNASEH2A)	uc002mvg.1	9e-71	Human
dd_Smed_v4_9266	2.49372	2.26513	MAP3K3	uc010wpp.2	5e-88	Human
dd_Smed_v4_4670	2.70923	2.25975	GNB2	uc003uwb.3	6e-101	Human
dd_Smed_v4_6877	2.46294	2.25863	Smad1	EF633692.1	0	Smed
dd_Smed_v4_817	3.87912	2.25196	TAF6	uc003utk.3	2e-50	Human
dd_Smed_v4_52590	1.97035	2.25035	NA	NA	NA	NA
dd_Smed_v4_585	2.06271	2.24772	X1.A5.1	KF730666.1	0	Smed
dd_Smed_v4_7847	2.43215	2.24731	slc46a-3 (slc46a-3)	KT163745.1	0	Smed
dd_Smed_v4_7989	2.52451	2.23827	LIM domain containing 2 (LIMD2)	uc002jbl.4	7e-15	Human
dd_Smed_v4_14230	2.92474	2.22644	NA	NA	NA	NA
dd_Smed_v4_3349	2.49372	2.22396	fer (fps/fes related) tyrosine kinase (FER)	uc011cvg.1	2e-53	Human
dd_Smed_v4_11629	2.0935	2.21885	Evi/Wls	FJ463748.1	0	Smed
dd_Smed_v4_13377	3.38654	2.21536	NOS1AP	uc010pkr.1	3e-53	Human
dd_Smed_v4_23157	2.40136	2.20632	jerky homolog-like (mouse) (JRKL)	uc001pfy.2	1e-13	Human
dd_Smed_v4_11394	4.49486	2.19804	unc-13 homolog B (C. elegans) (UNC13B)	uc003zwq.3	0	Human
dd_Smed_v4_29119	4.18699	2.19754	NA	NA	NA	NA
dd_Smed_v4_7114	2.06271	2.1906	NA	NA	NA	NA
dd_Smed_v4_10186	3.0171	2.18973	Bardet-Biedl syndrome 2 (BBS2)	uc010ccg.2	5e-83	Human
dd_Smed_v4_1092	2.03192	2.18768	NA	NA	NA	NA
dd_Smed_v4_5758	2.24743	2.18235	autophagy related 2B (ATG2B)	uc001yfi.3	9e-27	Human
dd_Smed_v4_11739	2.43215	2.18037	NA	NA	NA	NA
dd_Smed_v4_16503	2.92474	2.1784	NA	NA	NA	NA
dd_Smed_v4_26331	3.63283	2.1782	NA	NA	NA	NA
dd_Smed_v4_38403	3.04788	2.17763	NA	NA	NA	NA
dd_Smed_v4_29966	3.54047	2.17471	NA	NA	NA	NA
dd_Smed_v4_11468	3.29418	2.1689	NA	NA	NA	NA
dd_Smed_v4_11571	2.06271	2.1688	FAM46C	uc021osq.1	7e-84	Human
dd_Smed_v4_13835	2.80159	2.16714	5B07 rhomboid-like protein	KJ573355.1	0	Smed
dd_Smed_v4_12714	1.29304	2.16507	NA	uc003xgu.3	2e-56	Human
dd_Smed_v4_4302	2.95552	2.15387	zinc finger protein 259 (ZNF259)	uc001ppp.3	8e-107	Human
dd_Smed_v4_2805	3.50968	2.15211	NA	NA	NA	NA
dd_Smed_v4_71655	2.309	2.15001	NA	NA	NA	NA
dd_Smed_v4_1781	2.18586	2.14828	NA	uc002gsr.1	0	Human
dd_Smed_v4_49907	2.27822	2.14814	NA	NA	NA	NA
dd_Smed_v4_9546	1.90877	2.14259	Evi/Wls	FJ463748.1	0	Smed
dd_Smed_v4_7474	2.64766	2.13477	SLC16A1	uc001ecz.3	2e-12	Human
dd_Smed_v4_9513	3.38654	2.13339	slc47a-5 (slc47a-5)	KT163752.1	0	Smed
dd_Smed_v4_6180	3.38654	2.1299	neuroligin 4, Y-linked (NLGN4Y)	uc004fth.2	8e-20	Human
dd_Smed_v4_38249	2.46294	2.1274	NA	NA	NA	NA
dd_Smed_v4_1566	3.29418	2.12704	prohormone convertase 2	BK007043.1	0	Smed
dd_Smed_v4_13412	2.21664	2.12227	protocadherin 1 (PCDH1)	uc011dbf.2	1e-60	Human
dd_Smed_v4_6736	2.24743	2.11824	tenascin C (TNC)	uc022bmj.1	6e-19	Human
dd_Smed_v4_7157	2.06271	2.11316	NA	NA	NA	NA
dd_Smed_v4_13085	2.27822	2.10964	poly(A) polymerase gamma (PAPOLG)	uc002sai.3	5e-45	Human
dd_Smed_v4_7415	2.46294	2.08166	Smed10286_V2 IQ motif and Sec7 domain-1	JX010529.1	0	Smed
dd_Smed_v4_10068	2.61687	2.08147	methyltransferase like 5 (METTL5)	uc002ufp.3	2e-60	Human
dd_Smed_v4_5187	3.07867	2.08096	FRAS1 related extracellular matrix 1 (FREM1)	uc003zlm.3	1e-89	Human
dd_Smed_v4_5823	2.80159	2.07203	myosin VIIA (MYO7A)	uc001oyc.2	0	Human
dd_Smed_v4_26304	2.92474	2.06948	NA	NA	NA	NA
dd_Smed_v4_1173	3.20182	2.06837	NA	NA	NA	NA
dd_Smed_v4_17148	3.20182	2.06751	NA	NA	NA	NA
dd_Smed_v4_7509	2.43215	2.06286	GNB1	uc001aif.3	3e-37	Human
dd_Smed_v4_26870	2.74002	2.06103	GRIA4	uc001piw.2	2e-12	Human
dd_Smed_v4_19912	2.86316	2.06097	peroxidasin homolog (Drosophila) (PXDN)	uc002qxc.1	1e-14	Human
dd_Smed_v4_3014	2.12428	2.06014	nucleotide binding protein 1 (NUBP1)	uc002daa.1	1e-100	Human
dd_Smed_v4_13817	3.66362	2.05628	musashi RNA-binding protein 2 (MSI2)	uc002iva.3	4e-52	Human
dd_Smed_v4_3339	3.41732	2.05319	NA	uc003htl.3	1e-23	Human
dd_Smed_v4_835	2.5553	2.04742	NA	uc011cwn.2	3e-108	Human
dd_Smed_v4_14730	3.60204	2.04314	CACNA1H	uc002ckv.3	0	Human
dd_Smed_v4_39157	1.87799	2.03721	NA	NA	NA	NA
dd_Smed_v4_19210	3.90991	2.02773	unc-51-like kinase 2 (C. elegans) (ULK2)	uc002gwn.3	4e-08	Human
dd_Smed_v4_10902	2.06271	2.02617	MFSD10	uc003gfz.3	1e-62	Human
dd_Smed_v4_9941	2.43215	2.02598	PAK6	uc001zlb.3	8e-10	Human
dd_Smed_v4_9272	2.37058	2.02296	insulin receptor-like 1 protein	JN049497.1	0	Smed
dd_Smed_v4_6075	3.20182	2.021	REXO4	uc011mdf.2	2e-61	Human
dd_Smed_v4_7015	2.49372	2.01782	protein kinase N2 (PKN2)	uc010osr.2	2e-87	Human
dd_Smed_v4_84769	3.0171	2.01735	NA	NA	NA	NA
dd_Smed_v4_9010	2.67844	2.01535	NA	NA	NA	NA
dd_Smed_v4_8406	2.00114	2.0122	PCSK1	uc003kls.2	4e-159	Human
dd_Smed_v4_2641	2.0935	2.01059	septin 7 (SEPT7)	uc010kxc.3	7e-146	Human
dd_Smed_v4_12850	2.27822	2.01024	G patch domain containing 11 (GPATCH11)	uc010ezz.3	8e-37	Human
dd_Smed_v4_3670	4.4025	1.99943	DNAHb-1 (DNAHb-1)	KT163763.1	0	Smed
dd_Smed_v4_8690	2.37058	1.9981	leucine rich repeat containing 4 (LRRC4)	uc022akv.1	4e-10	Human
dd_Smed_v4_17293	4.27935	1.99656	ankyrin 1, erythrocytic (ANK1)	uc003xol.3	4e-30	Human
dd_Smed_v4_11432	2.27822	1.9933	CDT1	uc002flu.3	1e-08	Human
dd_Smed_v4_3375	2.40136	1.99191	apaf1	JN621807.1	0	Smed
dd_Smed_v4_13903	2.43215	1.99168	matrix-remodelling associated 5 (MXRA5)	uc004crg.4	2e-23	Human
dd_Smed_v4_10216	1.93956	1.99048	snail-like	KJ934814.1	0	Smed
dd_Smed_v4_9728	2.61687	1.98658	centrosomal protein 170kDa (CEP170)beta	uc021plq.1	1e-11	Human
dd_Smed_v4_7611	2.52451	1.97955	NA	NA	NA	NA
dd_Smed_v4_11088	2.24743	1.97638	SON DNA binding protein (SON)f	uc002ysh.3	3e-14	Human
dd_Smed_v4_7700	2.0935	1.97604	attractin (ATRN)	uc002wim.2	5e-32	Human
dd_Smed_v4_8364	2.74002	1.97466	serine/threonine kinase 24 (STK24)	uc001vnn.1	2e-26	Human
dd_Smed_v4_6801	2.92474	1.97437	MAN1A2	uc001ehd.1	3e-175	Human
dd_Smed_v4_15518	2.33979	1.97165	NA	NA	NA	NA
dd_Smed_v4_8483	2.18586	1.97048	SOXP-2	JQ425152.1	0	Smed
dd_Smed_v4_2034	2.0935	1.96632	eukaryotic translation initiation factor 5 (EIF5)	uc001ymu.3	9e-69	Human
dd_Smed_v4_30279	3.50968	1.96515	NA	uc001mxd.1	9e-17	Human
dd_Smed_v4_5353	2.24743	1.96183	beclin 1, autophagy related (BECN1)	uc002ibn.2	6e-70	Human

## Sheet: SF1D
Supplementary file 1D. Quantification of PCG and mag-1 domain shifts in nr4A vs. control RNAi.
Gene	Quantification Measure	unc22 Avg	unc22 SD	nr4A Avg	nr4A SD	t-test statistic	Significant?
mag-1 4w	Top of Eyes-Post Boundary*	0.111504	0.0237591	0.103487	0.0161199	0.243561	X
mag-1 9w	Top of Eyes-Post Boundary*	0.0988588	0.0232198	0.131964	0.0316121	0.0217157	✓
mag-1 9w	Top of Eyes-Ant Boundary*	-0.000755984	0.0200205	-0.0024053	0.00651568	0.415461	X
ndl-2 2w	Ant Tip-Ant Boundary*	0.0283888	0.0018282	0.0307422	0.00596667	0.248767	X
ndl-2 2w	Top of Eyes-Ant Boundary*	-0.0183384	0.00316008	-0.01538	0.0060097	0.213595	X
ndl-2 2w	Ant Tip-Post Boundary*^	0.220132	0.0224877	0.240669	0.0189553	0.213385	X
ndl-2 2w	Top of Eyes-Post Boundary*^	0.174753	0.019953	0.196194	0.0150369	0.140668	X
ndl-2 3w	Ant Tip-Ant Boundary*	0.0242457	0.00249134	0.0309883	0.00626999	0.097681	X
ndl-2 3w	Top of Eyes-Ant Boundary*	-0.0156071	0.00389853	-0.00427705	0.00603044	0.0300236	✓
ndl-2 3w	Ant Tip-Post Boundary*^	0.251975	0.0159243	0.257114	0.00832213	0.594557	X
ndl-2 3w	Top of Eyes-Post Boundary*^	0.213887	0.0135416	0.223132	0.0072996	0.287514	X
ndl-2 4w	Ant Tip-Ant Boundary*	0.0269038	0.00304012	0.0354925	0.00711453	0.0802841	X
ndl-2 4w	Top of Eyes-Ant Boundary*	-0.0155532	0.00176555	0.00406434	0.00508611	0.00763445	✓
ndl-2 4w	Ant Tip-Post Boundary*^	0.318778	0.0183162	0.262111	0.0228114	0.0262116	✓
ndl-2 4w	Top of Eyes-Post Boundary*^	0.279153	0.018952	0.231091	0.0189042	0.0248005	✓
ndl-2 9w	Ant Tip-Ant Boundary*	0.0283077	0.00485707	0.0677554	0.00313035	0.000402006	✓
ndl-2 9w	Top of Eyes-Ant Boundary*	-0.0106689	0.00398752	0.049412	0.00463499	6.03369e-06	✓
ndl-2 9w	Ant Tip-Post Boundary*^	0.32093	0.0558106	0.296023	0.00706172	0.520954	X
ndl-2 9w	Top of Eyes-Post Boundary*^	0.282176	0.0516425	0.279363	0.00867432	0.933827	X
ndl-3 9w	Ant Tip-Ant Boundary*	0.078612	0.00766354	0.100113	0.0118524	0.00298975	✓
ndl-3 9w	Post Tip-Post Boundary*^	0.626124	0.0490718	0.645163	0.0429397	0.411454	X
ndl-3 9w	Top of Eyes-Post Boundary*^	0.33785	0.0466046	0.340814	0.0438715	0.894833	X
ndl-4 4w	Ant Tip-Post Boundary*	0.0584555	0.0127531	0.0617384	0.00287777	0.324418	X
ndl-4 9w	Ant Tip-Post Boundary*	0.0354456	0.0123903	0.0781428	0.0106046	0.0043478	✓
ndl-4 9w	Ant Tip-Ant Boundary*	0.00399173	0.000174895	0.00774392	0.00222864	0.0214475	✓
ndl-4 9w	Top of Eyes-Ant Boundary*	0.0348955	0.00606332	0.00940461	0.00436472	0.00266644	✓
ndl-5 2w	Ant Tip-Ant Boundary*	0.0192624	0.00578002	0.0232264	0.00435298	0.102774	X
ndl-5 2w	Top of Eyes-Ant Boundary*	-0.0238763	0.00653284	-0.0205156	0.00608057	0.191831	X
ndl-5 2w	Ant Tip-Post Boundary*^	0.184815	0.0280297	0.19459	0.0227109	0.501937	X
ndl-5 2w	Top of Eyes-Post Boundary*^	0.142149	0.0255647	0.151436	0.0213827	0.490574	X
ndl-5 3w	Ant Tip-Ant Boundary*	0.0099473	0.0017722	0.0268901	0.0100826	0.0520079	X
ndl-5 3w	Top of Eyes-Ant Boundary*	-0.027592	0.00341459	-0.00756019	0.00896063	0.0294311	✓
ndl-5 3w	Ant Tip-Post Boundary*^	0.191129	0.0215068	0.213337	0.0265776	0.285887	X
ndl-5 3w	Top of Eyes-Post Boundary*^	0.155402	0.0187368	0.179378	0.0265419	0.25353	X
ndl-5 4w	Ant Tip-Ant Boundary*	0.029765	0.00882781	0.0439995	0.00899723	0.0202135	✓
ndl-5 4w	Top of Eyes-Ant Boundary*	-0.0135277	0.0106746	0.0133461	0.00691395	0.00407503	✓
ndl-5 4w	Ant Tip-Post Boundary*^	0.22684	0.0347762	0.207945	0.0250424	0.343171	X
ndl-5 4w	Top of Eyes-Post Boundary*^	0.183717	0.0340711	0.177863	0.0231581	0.753816	X
ndl-5 9w	Ant Tip-Ant Boundary*	0.0144887	0.00873375	0.0539998	0.0126072	7.30414e-05	✓
ndl-5 9w	Top of Eyes-Ant Boundary*	-0.0288441	0.00170369	0.0329894	0.00878844	3.60611e-06	✓
ndl-5 9w	Ant Tip-Post Boundary*^	0.203621	0.0563789	0.215365	0.0148477	0.640183	X
ndl-5 9w	Top of Eyes-Post Boundary*^	0.160224	0.0499508	0.19466	0.0159839	0.158771	X
ndk 9w	Ant Tip-Post Boundary*	0.130438	0.0217072	0.15766	0.026123	0.0394922	✓
nlg-8 9w	Post Tip-Post Boundary*	0.0124894	0.00414763	0.0269206	0.0143382	0.0436708	✓
ptk7 9w	Ant Boundary-Post Boundary*^	0.756584	0.0255617	0.765528	0.0358406	0.647613	X
sFRP-1 4w	Area within Boundary**	0.0235144	0.00606605	0.0212922	0.00374266	0.280146	X
sFRP-1 9w	Area within Boundary**	0.0181141	0.00937416	0.0287462	0.00507484	0.0320056	✓
sFRP-1 9w	Ant Tip-Post Boundary*	0.0450713	0.00531262	0.0506849	0.0111367	0.154053	X
wnt1 3w	Post Tip-Last Posterior Positive Cell*	0.0074438	0.00278742	0.0231201	0.00556766	1.0858e-06	✓
wnt1 4w	Post Tip-Last Posterior Positive Cell*	0.0116053	0.00524567	0.0469509	0.0179691	0.00480845	✓
wnt1 9w	Post Tip-Last Posterior Positive Cell*	0.0103669	0.00601993	0.0482589	0.0214073	0.00310829	✓
wnt2 9w	Ant Tip-Ant Boundary*	0.0203406	0.0181704	0.043928	0.00830782	0.00649778	✓
wnt2 9w	Ant Tip-Post Boundary*	0.329592	0.0408975	0.328973	0.0133127	0.486436	X
wnt2 9w	Top of Eyes-Post Boundary*	0.289061	0.0379303	0.31256	0.0149126	0.100669	X
wnt11-1 9w	Post Tip-Post Boundary*	0.200297	0.0591486	0.221636	0.0628564	0.234526	X
wnt11-1 9w	Area within Boundary**	0.130778	0.0704279	0.191384	0.0741331	0.0472223	✓
wnt11-2 3w	Post Tip-Post Boundary*	0.161745	0.0283186	0.200578	0.0348863	0.0683632	X
wnt11-2 4w	Post Tip-Post Boundary*	0.152534	0.0157109	0.174503	0.0197842	0.0961896	X
wnt11-2 9w	Post Tip-Ant Boundary*	0.116375	0.0443283	0.148866	0.0735435	0.162979	X
wnt11-2 9w	Area within Boundary**	0.0579251	0.0263746	0.0870676	0.059319	0.122073	X
wnt11-2 3w	Posterior Cluster Present? Fischer's Exact	N/A	N/A	N/A	N/A	Fischer's Exact p-val: 0.0286	✓
wnt11-2 4w	Posterior Cluster Present? Fischer's Exact	N/A	N/A	N/A	N/A	Fischer's Exact p-val: 0.0286	✓
wnt11-2 9w	Posterior Cluster Present? Fischer's Exact	N/A	N/A	N/A	N/A	Fischer's Exact p-val: 0.0047	✓
* Normalized To Length
** Normalized to Area
^two-tailed Welch's t-test used
w = weeks of RNAi
Statistical comparisons were done using one-tailed Welch's t-tests unless otherwise specified.

## Sheet: SF1E
Supplementary file 1E. nr4A+ muscle vs. nr4A- muscle SCDE.
Genes enriched in nr4A+ muscle cells (cZ > 1.96) sorted by cZ
Values for myoD (dd_Smed_v4_12634) and nkx1-1 (dd_Smed_v4_19327) shown at the bottom
Contig ID	mle	cZ	Best-blast hit	ID	E-Value	Organism
dd_Smed_v4_12229	10.5438	5.60108	nuclear receptor subfamily 4, group A, member 1 (NR4A1)	uc001rzt.3	1e-50	Human
dd_Smed_v4_701	0.794097	4.58377	collagen, type XXIV, alpha 1 (COL24A1)	uc001dli.3	1e-33	Human
dd_Smed_v4_323	0.617631	4.58377	clone D20Contig4 unknown	AY066538.1	6.65e-160	Smed
dd_Smed_v4_702	0.749981	4.39739	collagen, type II, alpha 1 (COL2A1)	uc001rqt.3	1e-26	Human
dd_Smed_v4_402	0.705864	4.11414	collagen, type XI, alpha 1 (COL11A1)A	uc001duk.3	2e-34	Human
dd_Smed_v4_740	0.749981	3.00181	collagen, type II, alpha 1 (COL2A1)	uc001rqv.3	1e-32	Human
dd_Smed_v4_832	0.661748	2.94696	collagen, type I, alpha 2 (COL1A2)	uc003ung.1	8e-37	Human
dd_Smed_v4_1923	1.76466	2.92105	smad4	HQ911781.1	0	Smed
dd_Smed_v4_249	0.617631	2.92105	myosin, heavy chain 7, cardiac muscle, beta (MYH7)	uc001wjx.3	2e-100	Human
dd_Smed_v4_6464	0.838214	2.92105	doublecortin domain containing 2 (DCDC2)	uc003ndy.3	4e-29	Human
dd_Smed_v4_11448	2.42641	2.92105	serine palmitoyltransferase, long chain base subunit 1 (SPTLC1)	uc011ltv.1	7e-18	Human
dd_Smed_v4_711	0.573515	2.92105	myosin, heavy chain 1, skeletal muscle, adult (MYH1)	uc002gmo.3	5e-88	Human
dd_Smed_v4_840	0.617631	2.87236	collagen, type I, alpha 2 (COL1A2)	uc003ung.1	2e-37	Human
dd_Smed_v4_3009	1.49996	2.84781	ubiquitin domain containing 2 (UBTD2)	uc003mbp.1	5e-58	Human
dd_Smed_v4_12008	2.07348	2.84197	RUN domain containing 3B (RUNDC3B)	uc011khd.1	6e-30	Human
dd_Smed_v4_10189	1.98524	2.82827	nuclear receptor binding SET domain protein 1 (NSD1)	uc003mft.4	8e-97	Human
dd_Smed_v4_223	0.485282	2.8278	myosin, light chain 6B, alkali, smooth muscle and non-muscle (MYL6B)	uc001sjt.3	1e-27	Human
dd_Smed_v4_405	0.573515	2.82586	tropomyosin 1 (alpha) (TPM1)	uc002alg.3	7e-49	Human
dd_Smed_v4_649	0.529398	2.82549	collagen, type II, alpha 1 (COL2A1)	uc001rqv.3	1e-36	Human
dd_Smed_v4_7033	1.89701	2.81753	zinc finger homeobox 3 (ZFHX3)A	uc002fck.3	2e-22	Human
dd_Smed_v4_508	0.441165	2.8172	tubulin, alpha 3d (TUBA3D)	uc002tsu.4	0	Human
dd_Smed_v4_13781	1.98524	2.81614	tlx1-like	KJ934817.1	0	Smed
dd_Smed_v4_8062	1.72054	2.81614	acyl-CoA synthetase short-chain family member 3 (ACSS3)	uc001szl.1	4e-110	Human
dd_Smed_v4_2393	1.01468	2.80639	pyruvate carboxylase (PC)	uc001ojp.1	0	Human
dd_Smed_v4_2197	0.397049	2.80493	collagen, type XXIV, alpha 1 (COL24A1)	uc001dlj.3	4e-61	Human
dd_Smed_v4_432	0.617631	2.802	clone M11 myosin heavy chain A (MhcA)	AF112359.2	0	Smed
dd_Smed_v4_13713	2.91169	2.802	transmembrane protein 246 (TMEM246)	uc022blf.1	9e-22	Human
dd_Smed_v4_14987	2.02936	2.7994	potassium voltage-gated channel, shaker-related subfamily, member 2 (KCNA2)	uc021oro.1	1e-152	Human
dd_Smed_v4_6473	2.29406	2.77559	XPA binding protein 2 (XAB2)	uc002mgx.3	0	Human
dd_Smed_v4_3963	1.41173	2.76661	NA	NA	NA	NA
dd_Smed_v4_3047	1.80878	2.76601	insulin-like growth factor 2 mRNA binding protein 2 (IGF2BP2)	uc010hyj.3	1e-13	Human
dd_Smed_v4_1947	1.76466	2.763	galactose mutarotase (aldose 1-epimerase) (GALM)	uc002rqy.3	6e-46	Human
dd_Smed_v4_1444	0.88233	2.76031	WW domain containing E3 ubiquitin protein ligase 1 (WWP1)	uc003ydt.3	0	Human
dd_Smed_v4_7675	1.10291	2.75344	NA	NA	NA	NA
dd_Smed_v4_5221	1.94113	2.73571	NA	NA	NA	NA
dd_Smed_v4_8009	0.926447	2.72023	NA	NA	NA	NA
dd_Smed_v4_7034	0.794097	2.71933	SIN3 transcription regulator homolog B (yeast) (SIN3B)	uc002nez.2	1e-47	Human
dd_Smed_v4_2909	1.80878	2.70063	NADH dehydrogenase (ubiquinone) flavoprotein 2, 24kDa (NDUFV2)	uc002knu.3	1e-95	Human
dd_Smed_v4_9411	1.76466	2.6996	KIAA2026 (KIAA2026)	uc003zjq.4	2e-21	Human
dd_Smed_v4_3468	1.3235	2.69422	ATPase family, AAA domain containing 1 (ATAD1)	uc001kez.1	3e-71	Human
dd_Smed_v4_3302	1.85289	2.66896	NA	NA	NA	NA
dd_Smed_v4_2133	1.89701	2.66866	proteasome (prosome, macropain) 26S subunit, ATPase, 6 (PSMC6)	uc010tqx.2	0	Human
dd_Smed_v4_11088	1.67643	2.66695	SON DNA binding protein (SON)f	uc002ysh.3	3e-14	Human
dd_Smed_v4_1432	0.794097	2.65846	ankyrin 3, node of Ranvier (ankyrin G) (ANK3)	uc001jkz.4	0	Human
dd_Smed_v4_11481	1.94113	2.65564	glutamate receptor, ionotropic, N-methyl D-aspartate 2A (GRIN2A)	uc010uyn.2	3e-96	Human
dd_Smed_v4_4805	1.3235	2.64953	ATPase, H+ transporting, lysosomal V0 subunit a1 (ATP6V0A1)	uc002hzs.3	0	Human
dd_Smed_v4_6490_1	2.38229	2.646	zinc finger, MIZ-type containing 2 (ZMIZ2)	uc003tlr.3	2e-20	Human
dd_Smed_v4_9680	1.23526	2.64477	NA	NA	NA	NA
dd_Smed_v4_7407	2.69111	2.64066	zinc finger, FYVE domain containing 1 (ZFYVE1)	uc001xnm.3	3e-29	Human
dd_Smed_v4_10841	2.16171	2.6394	leucine rich repeat and sterile alpha motif containing 1 (LRSAM1)	uc004brd.2	5e-50	Human
dd_Smed_v4_13798	2.64699	2.63691	SVOP-like (SVOPL)	uc011kqh.2	9e-38	Human
dd_Smed_v4_6759	1.27938	2.63462	NA	NA	NA	NA
dd_Smed_v4_22711	1.54408	2.63462	NA	NA	NA	NA
dd_Smed_v4_4623	1.80878	2.63169	TNF receptor-associated factor 2 (TRAF2)	uc004cjv.3	1e-22	Human
dd_Smed_v4_9297	1.76466	2.63116	NA	uc002fnc.1	2e-33	Human
dd_Smed_v4_8507	1.0588	2.62737	GRIP and coiled-coil domain containing 2 (GCC2)	uc002ted.3	2e-29	Human
dd_Smed_v4_22585	2.11759	2.62362	strain BCN-10 zinc finger protein A (ZicA)	KF751216.1	0	Smed
dd_Smed_v4_5842	1.89701	2.62054	tudor domain containing 9 (TDRD9)	uc001yom.4	8e-158	Human
dd_Smed_v4_231	0.838214	2.61296	tubulin folding cofactor A (TBCA)	uc003kfh.1	2e-27	Human
dd_Smed_v4_10	0.308816	2.61216	NA	NA	NA	NA
dd_Smed_v4_7459	1.10291	2.60229	ubiquitin specific peptidase 7 (herpes virus-associated) (USP7)	uc002czl.2	0	Human
dd_Smed_v4_3564	1.45584	2.60229	NA	NA	NA	NA
dd_Smed_v4_7875	2.11759	2.60176	F-box and leucine-rich repeat protein 2 (FBXL2)	uc021wuy.1	6e-16	Human
dd_Smed_v4_2500	0.661748	2.60152	collagen, type IV, alpha 6 (COL4A6)B	uc004env.4	3e-74	Human
dd_Smed_v4_5577	2.69111	2.59994	NA	uc002lsj.3	1e-10	Human
dd_Smed_v4_5751	1.80878	2.59977	regulator of G-protein signaling 8 (RGS8)	uc001gpn.1	3e-15	Human
dd_Smed_v4_11093	0.926447	2.59746	NA	NA	NA	NA
dd_Smed_v4_5138	2.07348	2.59647	mitogen-activated protein kinase kinase kinase 3 (MAP3K3)	uc010wpo.2	2e-43	Human
dd_Smed_v4_6192	1.58819	2.59294	Smed05987_V2 luc7 like protein-3	JX010584.1	0	Smed
dd_Smed_v4_1989	1.63231	2.59284	NA	uc010jha.1	0	Human
dd_Smed_v4_2673	2.29406	2.59121	contactin 2 (axonal) (CNTN2)	uc001hbr.3	2e-87	Human
dd_Smed_v4_9760	2.07348	2.58711	NA	NA	NA	NA
dd_Smed_v4_8987	1.67643	2.58632	RFT1 homolog (S. cerevisiae) (RFT1)	uc003dgj.3	3e-39	Human
dd_Smed_v4_10471	1.94113	2.58037	NA	NA	NA	NA
dd_Smed_v4_1579	0.352932	2.58034	collagen, type IV, alpha 6 (COL4A6)B	uc004env.4	4e-110	Human
dd_Smed_v4_42728	2.47052	2.57753	NA	NA	NA	NA
dd_Smed_v4_5132	1.72054	2.56322	NA	NA	NA	NA
dd_Smed_v4_16435	1.54408	2.56247	unc-5 homolog C (C. elegans) (UNC5C)	uc003hto.3	2e-31	Human
dd_Smed_v4_1855	1.10291	2.55934	proteasome (prosome, macropain) 26S subunit, ATPase, 3 (PSMC3)	uc001nfh.2	0	Human
dd_Smed_v4_1450	2.24994	2.54972	NA	uc004ewq.4	2e-47	Human
dd_Smed_v4_1165	1.85289	2.54808	capping protein (actin filament) muscle Z-line, beta (CAPZB)	uc001bce.3	6e-125	Human
dd_Smed_v4_20146	3.61755	2.54309	immunoglobulin superfamily, member 10 (IGSF10)	uc011bod.2	2e-12	Human
dd_Smed_v4_5183	1.76466	2.5412	NA	NA	NA	NA
dd_Smed_v4_7825	1.54408	2.53695	RAB, member of RAS oncogene family-like 3 (RABL3)	uc003edx.3	7e-45	Human
dd_Smed_v4_9284	2.07348	2.52952	NA	NA	NA	NA
dd_Smed_v4_5102	1.0588	2.52365	Smed02232_V2 nou darake like-5	JX010560.1	0	Smed
dd_Smed_v4_2621	1.80878	2.51885	glycolipid transfer protein (GLTP)	uc001tpm.3	3e-10	Human
dd_Smed_v4_1070	0.661748	2.51176	collagen, type II, alpha 1 (COL2A1)	uc001rqv.3	4e-30	Human
dd_Smed_v4_6717	1.58819	2.50862	abhydrolase domain containing 13 (ABHD13)	uc021rml.1	6e-59	Human
dd_Smed_v4_3840	1.0588	2.50534	protein phosphatase 2, regulatory subunit A, alpha (PPP2R1A)	uc002pyp.3	1e-38	Human
dd_Smed_v4_3662	1.01468	2.50286	5'-3' exoribonuclease 1 (XRN1)	uc003euw.3	7e-159	Human
dd_Smed_v4_4352	0.661748	2.49868	hypothetical protein Smed-abl-1	KY348645.1	0	Smed
dd_Smed_v4_2135	1.58819	2.49843	NA	uc002hhm.3	1e-148	Human
dd_Smed_v4_2572	1.14703	2.49697	vacuolar protein sorting 28 homolog (S. cerevisiae) (VPS28)	uc003zcs.1	2e-96	Human
dd_Smed_v4_9434	1.72054	2.49363	Kv channel interacting protein 1 (KCNIP1)	uc003mat.3	2e-65	Human
dd_Smed_v4_7268_1	2.69111	2.4926	NA	NA	NA	NA
dd_Smed_v4_5620	0.617631	2.49235	tensin 1 (TNS1)	uc002vgr.2	2e-36	Human
dd_Smed_v4_4457	1.98524	2.49165	CNKSR family member 3 (CNKSR3)	uc003qpy.3	1e-24	Human
dd_Smed_v4_6275	1.27938	2.49134	NA	NA	NA	NA
dd_Smed_v4_9829	2.16171	2.48897	hypothetical protein Smed-ldlr	KY348670.1	0	Smed
dd_Smed_v4_10041	2.11759	2.48658	NA	NA	NA	NA
dd_Smed_v4_4387	0.838214	2.48373	symplekin (SYMPK)	uc002pdn.3	0	Human
dd_Smed_v4_3142	1.01468	2.48286	NA	NA	NA	NA
dd_Smed_v4_2961	1.19115	2.48147	NA	NA	NA	NA
dd_Smed_v4_1853	1.54408	2.48059	serpin peptidase inhibitor, clade D (heparin cofactor), member 1 (SERPIND1)	uc002ztc.2	1e-16	Human
dd_Smed_v4_12594	0.970563	2.48025	hypothetical protein Smed-ryk	KY348679.1	0	Smed
dd_Smed_v4_5180	1.80878	2.47954	cullin 2 (CUL2)	uc001ixw.3	2e-127	Human
dd_Smed_v4_1344	1.72054	2.47617	methionine sulfoxide reductase B2 (MSRB2)	uc001iro.3	7e-44	Human
dd_Smed_v4_4018	1.63231	2.47566	NA	NA	NA	NA
dd_Smed_v4_13650	1.67643	2.47346	general transcription factor IIIC, polypeptide 3, 102kDa (GTF3C3)	uc002uts.3	6e-16	Human
dd_Smed_v4_6402	1.98524	2.47297	calpain 7 (CAPN7)	uc003bzn.3	0	Human
dd_Smed_v4_3898	0.705864	2.47049	NA	NA	NA	NA
dd_Smed_v4_6358	1.3235	2.46613	NA	NA	NA	NA
dd_Smed_v4_2453	2.29406	2.46319	mindbomb E3 ubiquitin protein ligase 2 (MIB2)5	uc001ago.3	3e-07	Human
dd_Smed_v4_11997	2.29406	2.46252	NA	NA	NA	NA
dd_Smed_v4_8002	1.63231	2.45807	lipin 3 (LPIN3)	uc002xjx.3	3e-110	Human
dd_Smed_v4_5007	1.23526	2.45783	slc30a-3 (slc30a-3)	KT163673.1	0	Smed
dd_Smed_v4_2754	1.23526	2.45783	splicing factor 3b, subunit 1, 155kDa (SF3B1)	uc002uue.3	0	Human
dd_Smed_v4_4747	1.67643	2.45614	elongation factor Tu GTP binding domain containing 2 (EFTUD2)	uc002ihn.2	0	Human
dd_Smed_v4_8454	1.72054	2.45428	PWWP domain containing 2A (PWWP2A)	uc011ded.2	3e-11	Human
dd_Smed_v4_7551	1.49996	2.45392	NA	uc010pph.2	1e-36	Human
dd_Smed_v4_17226	2.42641	2.45129	CUGBP, Elav-like family member 3 (CELF3)	uc009wmx.2	3e-117	Human
dd_Smed_v4_1558	1.10291	2.45046	NA	NA	NA	NA
dd_Smed_v4_27151	1.80878	2.45002	NA	NA	NA	NA
dd_Smed_v4_15124	2.16171	2.44787	SET domain and mariner transposase fusion gene (SETMAR)	uc011asp.2	1e-07	Human
dd_Smed_v4_3456	1.41173	2.4471	RAE1 RNA export 1 homolog (S. pombe) (RAE1)	uc002xyi.3	3e-144	Human
dd_Smed_v4_5205	1.01468	2.4471	DEAD (Asp-Glu-Ala-Asp) box helicase 42 (DDX42)	uc002jbv.3	0	Human
dd_Smed_v4_6614	1.49996	2.4471	NA	NA	NA	NA
dd_Smed_v4_10945	2.02936	2.4449	KIAA0556 (KIAA0556)	uc002dow.3	4e-173	Human
dd_Smed_v4_2405	0.88233	2.44326	NA	NA	NA	NA
dd_Smed_v4_2099	1.63231	2.43937	NA	uc001hth.3	5e-80	Human
dd_Smed_v4_11579	2.29406	2.43783	protocadherin 11 X-linked (PCDH11X)b	uc004efh.2	1e-82	Human
dd_Smed_v4_4524	1.98524	2.43553	NA	NA	NA	NA
dd_Smed_v4_12464	1.72054	2.43267	ubiquitin specific peptidase 48 (USP48)	uc001bfb.3	2e-93	Human
dd_Smed_v4_1711	0.794097	2.42999	NA	uc003cvy.3	0	Human
dd_Smed_v4_6594	1.3235	2.4287	Src homology 2 domain containing F (SHF)	uc010ueo.2	1e-22	Human
dd_Smed_v4_4766	1.98524	2.42733	N(alpha)-acetyltransferase 60, NatF catalytic subunit (NAA60)	uc010btm.3	1e-50	Human
dd_Smed_v4_3995	0.617631	2.42679	metastasis associated 1 family, member 3 (MTA3)	uc002rsq.3	1e-120	Human
dd_Smed_v4_13045	0.705864	2.42668	notch 2 (NOTCH2)	uc001eik.3	8e-15	Human
dd_Smed_v4_2480	1.36761	2.4238	N-ethylmaleimide-sensitive factor attachment protein, beta (NAPB)	uc002wta.3	1e-89	Human
dd_Smed_v4_10096	1.94113	2.4203	von Willebrand factor A domain containing 9 (VWA9)6	uc002ape.4	5e-29	Human
dd_Smed_v4_3986	2.02936	2.41691	NA	uc003dma.1	3e-167	Human
dd_Smed_v4_5778	1.76466	2.41382	tetratricopeptide repeat domain 12 (TTC12)	uc001pnu.3	2e-20	Human
dd_Smed_v4_4379	1.3235	2.40807	ubiquitin protein ligase E3 component n-recognin 7 (putative) (UBR7)	uc001ybm.4	1e-43	Human
dd_Smed_v4_7129	1.85289	2.40606	TIA1 cytotoxic granule-associated RNA binding protein-like 1 (TIAL1)	uc010qtb.1	2e-17	Human
dd_Smed_v4_1490	1.76466	2.40595	mitogen-activated protein kinase-activated protein kinase 3 (MAPKAPK3)	uc010hlr.2	4e-138	Human
dd_Smed_v4_16183	1.67643	2.40001	NA	NA	NA	NA
dd_Smed_v4_15588	1.89701	2.39635	NA	NA	NA	NA
dd_Smed_v4_6515	1.45584	2.39558	golgin A2 (GOLGA2)	uc011maw.2	3e-15	Human
dd_Smed_v4_4355	1.3235	2.39278	syntaxin 7 (STX7)	uc003qdg.2	8e-07	Human
dd_Smed_v4_9977	2.60287	2.39255	PKD2L-2 (PKD2L-2)	KT163782.1	0	Smed
dd_Smed_v4_4385	2.20583	2.38855	strawberry notch homolog 1 (Drosophila) (SBNO1)	uc009zxy.1	1e-164	Human
dd_Smed_v4_6017	2.29406	2.3879	TNF receptor-associated factor 6, E3 ubiquitin protein ligase (TRAF6)	uc001mws.2	6e-10	Human
dd_Smed_v4_2710	1.45584	2.38721	Src homology 2 domain containing adaptor protein B (SHB)	uc004aax.3	5e-22	Human
dd_Smed_v4_6750	2.16171	2.385	FtsJ RNA methyltransferase homolog 1 (E. coli) (FTSJ1)	uc004djo.1	4e-104	Human
dd_Smed_v4_1345	0.88233	2.3845	zinc finger protein 622 (ZNF622)	uc003jfq.3	4e-20	Human
dd_Smed_v4_7316	1.01468	2.38408	mitfl-2 protein (mitfl-2)	KF487118.1	0	Smed
dd_Smed_v4_4320	1.94113	2.38358	calcium/calmodulin-dependent protein kinase II delta (CAMK2D)5	uc003ibn.2	2e-165	Human
dd_Smed_v4_19480	1.89701	2.38125	ATP-binding cassette, sub-family C (CFTR/MRP), member 3 (ABCC3)	uc002isl.3	1e-91	Human
dd_Smed_v4_4819	1.19115	2.3786	adaptor-related protein complex 3, sigma 1 subunit (AP3S1)	uc003krl.3	1e-82	Human
dd_Smed_v4_1411	1.01468	2.37566	acetyl-CoA acyltransferase 2 (ACAA2)	uc002ldw.4	0	Human
dd_Smed_v4_9697	1.85289	2.37537	phosphopantothenoylcysteine synthetase (PPCS)	uc001chl.3	6e-76	Human
dd_Smed_v4_12570	2.02936	2.36991	ATP-binding cassette, sub-family B (MDR/TAP), member 10 (ABCB10)	uc001htp.4	3e-152	Human
dd_Smed_v4_4842	1.98524	2.36948	NA	NA	NA	NA
dd_Smed_v4_7921	0.838214	2.36652	roundabout, axon guidance receptor, homolog 2 (Drosophila) (ROBO2)	uc003dpy.4	6e-49	Human
dd_Smed_v4_5931	1.63231	2.36483	trafficking protein particle complex 6B (TRAPPC6B)	uc001wut.1	2e-45	Human
dd_Smed_v4_1772	0.485282	2.3631	ATPase, Ca++ transporting, cardiac muscle, slow twitch 2 (ATP2A2)b	uc001tqk.4	0	Human
dd_Smed_v4_15815	2.11759	2.36179	calcium channel, voltage-dependent, N type, alpha 1B subunit (CACNA1B)	uc004cog.3	0	Human
dd_Smed_v4_2465	2.33818	2.35803	ADP-ribosylation factor-like 8B (ARL8B)	uc003bqg.3	9e-112	Human
dd_Smed_v4_10260	1.49996	2.35724	NA	uc002nou.2	4e-09	Human
dd_Smed_v4_16850	0.88233	2.35331	NA	NA	NA	NA
dd_Smed_v4_5932	0.838214	2.35285	mitofusin 2 (MFN2)	uc009vni.3	4e-23	Human
dd_Smed_v4_10399	1.72054	2.34614	GCR158 (gcr158)	KX018952.1	0	Smed
dd_Smed_v4_1186	0.661748	2.34554	NADH dehydrogenase (ubiquinone) 1 beta subcomplex, 9, 22kDa (NDUFB9)	uc003yrg.4	5e-17	Human
dd_Smed_v4_3247	1.67643	2.3414	transducin (beta)-like 1 X-linked receptor 1 (TBL1XR1)	uc003fix.4	0	Human
dd_Smed_v4_6959	1.76466	2.34102	NA	NA	NA	NA
dd_Smed_v4_13738	2.11759	2.34093	polo-like kinase 1 (PLK1)	uc002dlz.1	1e-41	Human
dd_Smed_v4_2278	1.45584	2.33617	enhancer of rudimentary homolog (Drosophila) (ERH)	uc001xlc.2	2e-37	Human
dd_Smed_v4_816	1.01468	2.33593	hematopoietic prostaglandin D synthase (HPGDS)	uc003hte.1	1e-24	Human
dd_Smed_v4_2708	1.19115	2.33593	NA	NA	NA	NA
dd_Smed_v4_2489	1.0588	2.33421	TM2 domain containing 1 (TM2D1)	uc001czz.1	2e-10	Human
dd_Smed_v4_7343	1.89701	2.33222	leucine-rich repeat kinase 2 (LRRK2)	uc001rmg.4	2e-162	Human
dd_Smed_v4_16335	1.36761	2.33159	NA	NA	NA	NA
dd_Smed_v4_1721	0.573515	2.33082	ATPase, Ca++ transporting, plasma membrane 3 (ATP2B3)	uc004fht.1	0	Human
dd_Smed_v4_10513	1.98524	2.33069	endothelin converting enzyme 2 (ECE2)	uc003fnh.4	1e-33	Human
dd_Smed_v4_4207	1.14703	2.32908	FUN14 domain containing 1 (FUNDC1)	uc004dgc.3	4e-10	Human
dd_Smed_v4_11292	1.80878	2.3284	NA	NA	NA	NA
dd_Smed_v4_1075	0.661748	2.32639	ubiquitin-conjugating enzyme E2N (UBE2N)	uc001tcp.3	2e-85	Human
dd_Smed_v4_1270	0.970563	2.32597	slc20a-1 (slc20a-1)	KT163594.1	0	Smed
dd_Smed_v4_1420	2.51464	2.32342	La ribonucleoprotein domain family, member 6 (LARP6)	uc002ass.3	4e-18	Human
dd_Smed_v4_3242	2.16171	2.32316	TATA box binding protein (TBP)	uc011ehf.2	1e-48	Human
dd_Smed_v4_24366	1.80878	2.32065	NA	NA	NA	NA
dd_Smed_v4_12584	0.926447	2.31638	thyroid hormone receptor interactor 6 (TRIP6)	uc022aiv.1	5e-37	Human
dd_Smed_v4_1900	0.705864	2.31462	cyclin L2 (CCNL2)	uc021oep.1	1e-54	Human
dd_Smed_v4_7438	1.41173	2.31292	kelch domain containing 9 (KLHDC9)	uc001fxs.3	1e-15	Human
dd_Smed_v4_333	0.573515	2.3127	calponin 2 (CNN2)	uc002lqu.3	1e-42	Human
dd_Smed_v4_17402	2.60287	2.30592	BMP	EF633689.1	0	Smed
dd_Smed_v4_6596	2.69111	2.3058	NA	NA	NA	NA
dd_Smed_v4_8463	2.07348	2.30537	NA	uc004bhx.3	1e-37	Human
dd_Smed_v4_7661	1.67643	2.30317	NA	NA	NA	NA
dd_Smed_v4_11500	1.49996	2.30234	iroquois homeobox 2 (IRX2)	uc003jdb.3	3e-37	Human
dd_Smed_v4_17337	1.45584	2.30143	prune homolog 2 (Drosophila) (PRUNE2)	uc011lsk.2	1e-29	Human
dd_Smed_v4_8112	1.27938	2.30111	sterile alpha and TIR motif containing 1 (SARM1)	uc010crl.1	6e-140	Human
dd_Smed_v4_4631	1.01468	2.29809	macrophage migration inhibitory factor (glycosylation-inhibiting factor) (MIF)	uc002zyr.1	2e-15	Human
dd_Smed_v4_8483	1.19115	2.2965	SOXP-2	JQ425152.1	0	Smed
dd_Smed_v4_7864	1.49996	2.29484	NA	uc002bgq.1	6e-08	Human
dd_Smed_v4_7024_1	1.98524	2.29276	NA	uc002vsy.1	4e-86	Human
dd_Smed_v4_12043	2.47052	2.28949	leucine rich repeat containing 71 (LRRC71)	uc001fqm.2	3e-37	Human
dd_Smed_v4_2050	0.88233	2.28606	aldehyde dehydrogenase 6 family, member A1 (ALDH6A1)	uc001xpo.3	0	Human
dd_Smed_v4_4007	2.20583	2.2857	SEPT5-GP1BB readthrough (SEPT5-GP1BB)	uc002zpv.2	2e-128	Human
dd_Smed_v4_684	0.749981	2.28559	ATPase, H+ transporting, lysosomal 56/58kDa, V1 subunit B2 (ATP6V1B2)	uc003wzp.3	0	Human
dd_Smed_v4_5308	1.76466	2.28546	SHC (Src homology 2 domain containing) transforming protein 1 (SHC1)	uc001ffx.3	1e-27	Human
dd_Smed_v4_3626	0.705864	2.28423	LEM domain containing 3 (LEMD3)	uc009zqo.2	2e-21	Human
dd_Smed_v4_4010	1.58819	2.28408	Smed-dlp1 subunit 2 of solanesyl diphosphate synthase, complete cds	AB548865.1	0	Smed
dd_Smed_v4_10075	1.54408	2.28211	Kallmann syndrome 1 sequence (KAL1)	uc004csf.3	3e-37	Human
dd_Smed_v4_3876	1.23526	2.28131	NA	uc001cxg.3	2e-40	Human
dd_Smed_v4_13381	2.20583	2.27759	PAK1 interacting protein 1 (PAK1IP1)	uc003mzg.3	9e-16	Human
dd_Smed_v4_4859	0.926447	2.27759	NA	NA	NA	NA
dd_Smed_v4_9039	1.54408	2.27754	protein kinase, cGMP-dependent, type I (PRKG1)	uc009xow.2	2e-76	Human
dd_Smed_v4_9013	1.36761	2.27625	nucleobindin 1 (NUCB1)	uc002pla.3	1e-54	Human
dd_Smed_v4_4264	1.94113	2.27432	tubulin, gamma 1 (TUBG1)	uc002ian.3	0	Human
dd_Smed_v4_741	0.926447	2.27345	small nuclear ribonucleoprotein polypeptide E (SNRPE)	uc001hai.3	1e-37	Human
dd_Smed_v4_5336	2.29406	2.27233	amyloid beta (A4) precursor protein (APP)0	uc021wib.1	7e-13	Human
dd_Smed_v4_1752	0.573515	2.27156	calpain 3, (p94) (CAPN3)	uc001zpp.1	0	Human
dd_Smed_v4_998	0.617631	2.27149	ubiquitin-conjugating enzyme E2G 1 (UBE2G1)	uc002fxs.3	3e-90	Human
dd_Smed_v4_357	2.07348	2.27062	NA	NA	NA	NA
dd_Smed_v4_8386	1.01468	2.27051	tripartite motif containing 9 (TRIM9)	uc001wyx.4	1e-153	Human
dd_Smed_v4_12545	1.58819	2.26949	protein tyrosine phosphatase, receptor type, F (PTPRF)	uc001cjw.3	0	Human
dd_Smed_v4_3391	0.661748	2.26949	NPHS1-7 (NPHS1-7)	KT163773.1	0	Smed
dd_Smed_v4_6778	1.3235	2.26915	NA	uc001arp.1	8e-73	Human
dd_Smed_v4_7351	1.49996	2.26749	NA	NA	NA	NA
dd_Smed_v4_3205	2.11759	2.26741	EH-domain containing 4 (EHD4)	uc001zot.3	0	Human
dd_Smed_v4_8876	1.54408	2.26695	family with sequence similarity 60, member A (FAM60A)	uc001rke.3	4e-11	Human
dd_Smed_v4_4993	1.80878	2.2639	ubiquitin specific peptidase 46 (USP46)	uc003gzm.4	1e-14	Human
dd_Smed_v4_12813	2.16171	2.26318	NA	NA	NA	NA
dd_Smed_v4_4368	1.10291	2.25906	TNF receptor-associated factor 2 (TRAF2)	uc010nbw.3	1e-53	Human
dd_Smed_v4_17325	1.0588	2.25845	NA	NA	NA	NA
dd_Smed_v4_3428	1.10291	2.25749	THO complex 7 homolog (Drosophila) (THOC7)	uc003dlt.4	3e-34	Human
dd_Smed_v4_1467	1.76466	2.25533	EF-hand domain family, member D1 (EFHD1)	uc002vtc.3	2e-47	Human
dd_Smed_v4_14671	1.54408	2.25452	NA	NA	NA	NA
dd_Smed_v4_3433	1.63231	2.25404	TAF5 RNA polymerase II, TATA box binding protein (TBP)-associated factor, 100kDa (TAF5)	uc001kwv.3	2e-23	Human
dd_Smed_v4_2183	1.0588	2.25316	dual specificity phosphatase 15 (DUSP15)	uc002wwx.1	2e-39	Human
dd_Smed_v4_7150	1.98524	2.25044	ubiquitin specific peptidase 2 (USP2)	uc001pwn.4	4e-105	Human
dd_Smed_v4_635	0.573515	2.24991	transgelin (TAGLN)	uc001pqp.3	6e-07	Human
dd_Smed_v4_6139	1.27938	2.249	zinc finger protein 330 (ZNF330)	uc003iiq.4	1e-114	Human
dd_Smed_v4_6617	1.58819	2.24882	NA	NA	NA	NA
dd_Smed_v4_10338	1.58819	2.24815	poly (ADP-ribose) polymerase 1 (PARP1)	uc001hqd.4	0	Human
dd_Smed_v4_4665	1.49996	2.24296	Smed09699_V2 surfeit 4-1	JX010599.1	0	Smed
dd_Smed_v4_9330	1.27938	2.24263	NA	uc003hse.1	7e-41	Human
dd_Smed_v4_829	2.02936	2.23838	NA	uc003ozp.2	3e-26	Human
dd_Smed_v4_9248	1.72054	2.23591	NA	NA	NA	NA
dd_Smed_v4_6728	0.749981	2.23589	NA	NA	NA	NA
dd_Smed_v4_14779	2.38229	2.23261	NA	NA	NA	NA
dd_Smed_v4_11684	1.67643	2.23243	NA	uc003zin.3	1e-19	Human
dd_Smed_v4_24988	2.11759	2.23206	retrotransposon-like 1 (RTL1)	uc010txj.1	5e-29	Human
dd_Smed_v4_9945	1.3235	2.2308	protein associated with Myc (PAM)	KU852680.1	0	Smed
dd_Smed_v4_514	1.72054	2.2299	translocase of inner mitochondrial membrane 8 homolog A (yeast) (TIMM8A)	uc004ehd.2	4e-09	Human
dd_Smed_v4_3803	1.67643	2.2296	FAD-dependent oxidoreductase domain containing 1 (FOXRED1)	uc010sbr.2	2e-88	Human
dd_Smed_v4_10625	1.10291	2.22838	catenin (cadherin-associated protein), alpha-like 1 (CTNNAL1)	uc004bdo.1	6e-15	Human
dd_Smed_v4_5176	0.794097	2.22654	acidic (leucine-rich) nuclear phosphoprotein 32 family, member E (ANP32E)	uc001etv.4	2e-26	Human
dd_Smed_v4_1418	1.3235	2.22643	NA	uc002fgy.1	3e-13	Human
dd_Smed_v4_1434	0.529398	2.22588	clone M111 myosin heavy chain A	AF414353.1	0	Smed
dd_Smed_v4_1137	0.485282	2.22535	cylindromatosis (turban tumor syndrome) (CYLD)	uc002egr.1	2e-37	Human
dd_Smed_v4_8836	1.23526	2.22395	NA	uc003qcs.1	2e-36	Human
dd_Smed_v4_9441	2.02936	2.22301	cat eye syndrome chromosome region, candidate 5 (CECR5)	uc002zmf.3	4e-44	Human
dd_Smed_v4_8296	1.72054	2.22204	protein kinase, cGMP-dependent, type I (PRKG1)	uc001jjm.3	1e-58	Human
dd_Smed_v4_2265	0.573515	2.22134	NA	uc009zui.1	7e-104	Human
dd_Smed_v4_9808	1.01468	2.2203	NA	NA	NA	NA
dd_Smed_v4_10329	2.47052	2.21746	nucleoporin 35kDa (NUP35)	uc010zft.2	8e-23	Human
dd_Smed_v4_4708	1.94113	2.21542	human immunodeficiency virus type I enhancer binding protein 3 (HIVEP3)	uc001cgz.4	1e-12	Human
dd_Smed_v4_7425	1.58819	2.21418	NA	NA	NA	NA
dd_Smed_v4_1286	1.36761	2.21343	mitogen-activated protein kinase kinase 6 (MAP2K6)	uc002jij.3	2e-101	Human
dd_Smed_v4_15257	2.24994	2.21334	NA	NA	NA	NA
dd_Smed_v4_5895	1.89701	2.21334	O-sialoglycoprotein endopeptidase-like 1 (OSGEPL1)	uc002uqz.1	6e-50	Human
dd_Smed_v4_5908	0.88233	2.21216	RNA binding motif protein 12 (RBM12)	uc021wcr.1	7e-16	Human
dd_Smed_v4_2180	0.926447	2.21187	protein kinase, cAMP-dependent, regulatory, type I, beta (PRKAR1B)	uc003siw.2	7e-84	Human
dd_Smed_v4_10504	1.0588	2.21101	NA	NA	NA	NA
dd_Smed_v4_11672	2.11759	2.2099	sperm associated antigen 9 (SPAG9)	uc002itb.3	4e-30	Human
dd_Smed_v4_14155	1.58819	2.2099	NA	NA	NA	NA
dd_Smed_v4_1209	0.838214	2.20966	golgi reassembly stacking protein 2, 55kDa (GORASP2)	uc002ugk.3	1e-82	Human
dd_Smed_v4_6063	0.926447	2.20965	SID1 transmembrane family, member 1 (SIDT1)	uc003eak.3	8e-130	Human
dd_Smed_v4_6758	1.19115	2.20923	G patch domain and ankyrin repeats 1 (GPANK1)	uc011jll.2	7e-11	Human
dd_Smed_v4_679	1.63231	2.20831	neuro-oncological ventral antigen 2 (NOVA2)	uc002pdv.2	9e-33	Human
dd_Smed_v4_8205	3.22051	2.20721	transcription factor AP-4 (activating enhancer binding protein 4) (TFAP4)	uc010uxg.2	3e-16	Human
dd_Smed_v4_8003	0.794097	2.20683	nuclear export mediator factor (NEMF)	uc001wxc.3	0	Human
dd_Smed_v4_5197	2.07348	2.20554	mitochondrial ribosomal protein L15 (MRPL15)	uc003xsa.2	5e-61	Human
dd_Smed_v4_4697	2.38229	2.20539	mediator of DNA-damage checkpoint 1 (MDC1)	uc011jhb.2	2e-23	Human
dd_Smed_v4_11489	1.49996	2.20402	NA	NA	NA	NA
dd_Smed_v4_3648	0.970563	2.20374	NA	uc003mte.3	7e-80	Human
dd_Smed_v4_7426	1.3235	2.20223	Cbl proto-oncogene, E3 ubiquitin protein ligase-like 1 (CBLL1)	uc011kmf.2	2e-28	Human
dd_Smed_v4_2551	0.970563	2.19977	mitochondrial ribosomal protein L23 (MRPL23)	uc001lux.3	1e-12	Human
dd_Smed_v4_5185	1.10291	2.19919	UPF1 regulator of nonsense transcripts homolog (yeast) (UPF1)	uc002nkf.3	0	Human
dd_Smed_v4_1339	1.63231	2.19879	aldehyde dehydrogenase 2 family (mitochondrial) (ALDH2)	uc001tst.3	0	Human
dd_Smed_v4_8348	1.80878	2.19137	salt-inducible kinase 2 (SIK2)	uc001plt.3	4e-95	Human
dd_Smed_v4_1603	0.794097	2.19116	NA	uc003hru.1	6e-07	Human
dd_Smed_v4_436	0.397049	2.18972	tropomyosin 1 (alpha) (TPM1)	uc002alp.3	1e-54	Human
dd_Smed_v4_6459	1.76466	2.18965	NA	NA	NA	NA
dd_Smed_v4_6502	1.41173	2.1896	translocase of inner mitochondrial membrane 44 homolog (yeast) (TIMM44)	uc002miz.3	1e-90	Human
dd_Smed_v4_8815	1.85289	2.18723	NA	NA	NA	NA
dd_Smed_v4_13135	1.89701	2.18681	dynein, axonemal, heavy chain 17 (DNAH17)	uc010dhp.2	0	Human
dd_Smed_v4_10174	1.72054	2.1846	actinin, alpha 2 (ACTN2)	uc009xgi.1	4e-54	Human
dd_Smed_v4_275	0.749981	2.18343	NA	NA	NA	NA
dd_Smed_v4_12173	2.02936	2.18276	NA	uc011mgd.1	4e-11	Human
dd_Smed_v4_26182	2.02936	2.18253	T-box 1 (TBX1)B	uc002zqc.3	3e-69	Human
dd_Smed_v4_7735	1.85289	2.18246	phosphodiesterase 4C, cAMP-specific (PDE4C)	uc010ebk.3	4e-175	Human
dd_Smed_v4_2688	0.88233	2.18003	beta-catenin-1	EU296629.1	0	Smed
dd_Smed_v4_9378	0.794097	2.17948	SWI/SNF-related, matrix-associated actin-dependent regulator of chromatin, subfamily a, containing DEAD/H box 1 (SMARCAD1)5	uc010ila.3	5e-147	Human
dd_Smed_v4_8011	0.838214	2.17714	golgi brefeldin A resistant guanine nucleotide exchange factor 1 (GBF1)	uc001kux.2	0	Human
dd_Smed_v4_6164	1.94113	2.17622	kelch-like family member 20 (KLHL20)	uc001gjc.3	0	Human
dd_Smed_v4_17106	1.45584	2.17544	clone hectd1-2 hypothetical protein	KP954681.1	0	Smed
dd_Smed_v4_8767	1.89701	2.17531	glyoxylate reductase/hydroxypyruvate reductase (GRHPR)	uc003zzu.1	7e-101	Human
dd_Smed_v4_8383	1.54408	2.17508	mitochondrial intermediate peptidase (MIPEP)	uc001uox.4	1e-146	Human
dd_Smed_v4_15276_1	2.20583	2.17471	membrane associated guanylate kinase, WW and PDZ domain containing 2 (MAGI2)	uc010ldx.1	1e-09	Human
dd_Smed_v4_5356	1.3235	2.17465	NA	NA	NA	NA
dd_Smed_v4_5054	1.80878	2.17127	guanine monphosphate synthetase (GMPS)	uc003faq.3	0	Human
dd_Smed_v4_8052	1.80878	2.17079	chromosome 11 open reading frame 58 (C11orf58)	uc001mmk.2	1e-10	Human
dd_Smed_v4_14547	1.3235	2.1706	exonuclease 1 (EXO1)	uc021plk.1	8e-78	Human
dd_Smed_v4_1967	1.72054	2.16851	tolloid-like 1 (TLL1)	uc021xud.1	5e-18	Human
dd_Smed_v4_11981	1.72054	2.16634	unc-13 homolog B (C. elegans) (UNC13B)	uc003zwq.3	0	Human
dd_Smed_v4_2178	1.76466	2.1663	NA	NA	NA	NA
dd_Smed_v4_8408	1.0588	2.16607	G protein-coupled receptor 158 (GPR158)	uc001isj.3	7e-64	Human
dd_Smed_v4_1201	1.67643	2.16333	Smed00227_V2 UDP galactose 4 epimerase	JX010513.1	0	Smed
dd_Smed_v4_20759	1.36761	2.16333	zinc finger, BED-type containing 5 (ZBED5)	uc021qdu.1	2e-25	Human
dd_Smed_v4_6836	1.94113	2.16277	apoptosis-inducing factor, mitochondrion-associated, 1 (AIFM1)	uc004evh.3	3e-64	Human
dd_Smed_v4_8469	1.49996	2.16277	mitochondrial ribosomal protein S30 (MRPS30)	uc003joh.3	6e-08	Human
dd_Smed_v4_7016	1.58819	2.16243	ankyrin 2, neuronal (ANK2)	uc003ibd.4	9e-24	Human
dd_Smed_v4_22984	1.98524	2.16194	NA	NA	NA	NA
dd_Smed_v4_3994	1.63231	2.16165	aminomethyltransferase (AMT)	uc003cww.3	7e-112	Human
dd_Smed_v4_7194	1.45584	2.16157	NA	NA	NA	NA
dd_Smed_v4_24316	1.19115	2.15623	GCR110 (gcr110)	KX018912.1	0	Smed
dd_Smed_v4_4669	1.45584	2.15546	calmodulin 2 (phosphorylase kinase, delta) (CALM2)	uc002rvt.2	4e-25	Human
dd_Smed_v4_8391	2.11759	2.15356	ankyrin 2, neuronal (ANK2)	uc003ibc.2	7e-36	Human
dd_Smed_v4_2201	0.529398	2.15286	HORMA domain containing 2 (HORMAD2)	uc003agy.3	4e-40	Human
dd_Smed_v4_6354	2.29406	2.14987	NA	NA	NA	NA
dd_Smed_v4_1885	1.72054	2.14896	NA	uc003lvo.3	6e-53	Human
dd_Smed_v4_9474	1.27938	2.14806	smoothened-like protein	GQ337476.1	0	Smed
dd_Smed_v4_4820	1.45584	2.14723	DNAJB13-like protein (DNAJB13)	KT983967.1	0	Smed
dd_Smed_v4_1440	2.16171	2.14717	NA	NA	NA	NA
dd_Smed_v4_7006	2.07348	2.14703	RNA binding motif protein 10 (RBM10)5	uc004dhi.3	5e-11	Human
dd_Smed_v4_8484	1.67643	2.14703	NA	NA	NA	NA
dd_Smed_v4_2876	2.47052	2.147	alkB, alkylation repair homolog 1 (E. coli) (ALKBH1)	uc001xuc.1	2e-38	Human
dd_Smed_v4_5433	1.45584	2.14625	phosphatidylinositol-specific phospholipase C, X domain containing 3 (PLCXD3)	uc003jmm.1	2e-71	Human
dd_Smed_v4_10521	1.19115	2.14606	NA	NA	NA	NA
dd_Smed_v4_10201	1.27938	2.14454	NA	uc001rfv.3	3e-49	Human
dd_Smed_v4_542	1.54408	2.1433	P450 (cytochrome) oxidoreductase (POR)	uc003udy.3	0	Human
dd_Smed_v4_11062	1.72054	2.14221	bambi	HQ911782.1	0	Smed
dd_Smed_v4_85086	1.80878	2.14219	calcium/calmodulin-dependent protein kinase IV (CAMK4)	uc003kpf.3	2e-15	Human
dd_Smed_v4_1324	1.76466	2.14158	protein phosphatase 4, catalytic subunit (PPP4C)	uc002dwf.3	0	Human
dd_Smed_v4_11285	1.14703	2.14137	Smed-NDK	GU592830.1	0	Smed
dd_Smed_v4_3878	1.49996	2.14058	ring finger protein 10 (RNF10)	uc001tyq.4	1e-13	Human
dd_Smed_v4_9783	1.76466	2.14033	NA	NA	NA	NA
dd_Smed_v4_9546	1.0588	2.13894	Evi/Wls	FJ463748.1	0	Smed
dd_Smed_v4_3653	1.89701	2.13728	signal recognition particle 14kDa (homologous Alu RNA binding protein) (SRP14)	uc001zkq.2	2e-30	Human
dd_Smed_v4_8216	0.926447	2.1364	lysine (K)-specific demethylase 5B (KDM5B)	uc009xag.3	2e-07	Human
dd_Smed_v4_3301	0.749981	2.1357	DnaJ (Hsp40) homolog, subfamily C , member 25 (DNAJC25)	uc004bfl.3	2e-71	Human
dd_Smed_v4_7244	0.705864	2.13495	SET binding factor 2 (SBF2)	uc001mib.2	2e-179	Human
dd_Smed_v4_11127	1.72054	2.13328	WD repeat domain 66 (WDR66)	uc009zxk.3	0	Human
dd_Smed_v4_1750	0.88233	2.13304	ribosomal protein L10a (RPL10A)	uc003oks.1	6e-59	Human
dd_Smed_v4_13171	2.29406	2.13144	protection of telomere 1-like protein	JX188060.1	0	Smed
dd_Smed_v4_4073	0.794097	2.12872	transformer 2 beta homolog (Drosophila) (TRA2B)	uc003fpv.3	5e-31	Human
dd_Smed_v4_2082	1.14703	2.1277	VASA-2	JQ425141.1	0	Smed
dd_Smed_v4_5321	0.705864	2.12766	peptidase inhibitor 16 (PI16)	uc003omz.1	4e-11	Human
dd_Smed_v4_15531	1.76466	2.12722	zinc finger protein of the cerebellum 2 (zic-2)	KT983964.1	0	Smed
dd_Smed_v4_981	0.838214	2.1254	ATP synthase, H+ transporting, mitochondrial F1 complex, O subunit (ATP5O)	uc002ytl.3	3e-41	Human
dd_Smed_v4_5246	1.63231	2.124	RNA binding motif protein 34 (RBM34)	uc001hwn.3	1e-18	Human
dd_Smed_v4_1319	1.01468	2.12057	mitogen-activated protein kinase 3 (MAPK3)	uc002dws.3	3e-171	Human
dd_Smed_v4_10165	1.23526	2.11951	NA	NA	NA	NA
dd_Smed_v4_7995	1.41173	2.11932	epithelial splicing regulatory protein 2 (ESRP2)	uc002evq.1	3e-37	Human
dd_Smed_v4_4330	2.20583	2.119	telomere repeat binding factor 2-1 (TRF2-1)	KU852673.1	0	Smed
dd_Smed_v4_1913	1.01468	2.11809	proteasome (prosome, macropain) 26S subunit, non-ATPase, 13 (PSMD13)	uc001lol.2	3e-81	Human
dd_Smed_v4_4788	1.19115	2.11711	iron-sulfur cluster assembly 1 homolog (S. cerevisiae) (ISCA1)	uc004aop.3	7e-48	Human
dd_Smed_v4_6243	0.441165	2.11692	zinc finger CCCH-type containing 6 (ZC3H6)	uc002thq.1	1e-21	Human
dd_Smed_v4_11085	1.67643	2.11692	KIAA1239 (KIAA1239)	uc011bxz.2	3e-60	Human
dd_Smed_v4_14006	1.67643	2.11555	potassium intermediate/small conductance calcium-activated channel, subfamily N, member 3 (KCNN3)	uc001ffp.3	6e-132	Human
dd_Smed_v4_3661	1.80878	2.11553	component of oligomeric golgi complex 7 (COG7)	uc002dlo.3	2e-63	Human
dd_Smed_v4_5390	2.82346	2.11553	NA	NA	NA	NA
dd_Smed_v4_19560	1.67643	2.11432	NA	NA	NA	NA
dd_Smed_v4_918	2.02936	2.11345	NA	NA	NA	NA
dd_Smed_v4_6480	2.11759	2.11251	adrenergic, beta, receptor kinase 2 (ADRBK2)	uc003abx.4	0	Human
dd_Smed_v4_5425	1.45584	2.11179	ER membrane protein complex subunit 9 (EMC9)	uc001wmi.3	1e-35	Human
dd_Smed_v4_4481	1.0588	2.11124	eukaryotic elongation factor, selenocysteine-tRNA-specific (EEFSEC)	uc003eki.3	6e-166	Human
dd_Smed_v4_1124	0.794097	2.1112	NA	NA	NA	NA
dd_Smed_v4_6931	1.58819	2.11019	acid phosphatase 2, lysosomal (ACP2)	uc001nei.3	9e-55	Human
dd_Smed_v4_4082	1.10291	2.10979	NA	NA	NA	NA
dd_Smed_v4_5770	1.01468	2.10956	cullin 1 (CUL1)	uc003wey.3	0	Human
dd_Smed_v4_3489	0.794097	2.10904	polyglutamine binding protein 1 (PQBP1)7	uc004dll.3	1e-18	Human
dd_Smed_v4_10128	0.617631	2.10743	NA	NA	NA	NA
dd_Smed_v4_3707	0.573515	2.10315	NA	uc009wro.1	2e-09	Human
dd_Smed_v4_18347	1.67643	2.1026	NA	NA	NA	NA
dd_Smed_v4_3117_1	1.01468	2.1026	coiled-coil domain containing 47 (CCDC47)	uc010ddx.3	2e-109	Human
dd_Smed_v4_5210	1.36761	2.1026	component of oligomeric golgi complex 2 (COG2)	uc001htw.3	2e-98	Human
dd_Smed_v4_423	1.3235	2.1026	cystatin A (stefin A) (CSTA)	uc003eex.3	2e-15	Human
dd_Smed_v4_2397	1.0588	2.10241	NA	NA	NA	NA
dd_Smed_v4_6278	2.69111	2.10229	nucleolar complex associated 2 homolog (S. cerevisiae) (NOC2L)	uc001aby.4	2e-41	Human
dd_Smed_v4_11546	2.16171	2.10004	replication factor C (activator 1) 1, 145kDa (RFC1)	uc003gtx.2	5e-157	Human
dd_Smed_v4_2821	1.14703	2.09944	NA	uc003eib.3	1e-26	Human
dd_Smed_v4_5143	1.85289	2.09941	ADAM metallopeptidase domain 9 (ADAM9)	uc003xmr.3	3e-61	Human
dd_Smed_v4_8610	1.76466	2.09941	slc25a-11 (slc25a-11)	KT163629.1	0	Smed
dd_Smed_v4_3588	1.45584	2.09836	Hsp40	GU591873.1	1.99e-74	Smed
dd_Smed_v4_12204	1.23526	2.09797	NA	NA	NA	NA
dd_Smed_v4_10782	1.58819	2.09684	oxidoreductase NAD-binding domain containing 1 (OXNAD1)	uc003cax.3	1e-30	Human
dd_Smed_v4_6573	1.80878	2.09627	ciliary rootlet coiled-coil, rootletin (CROCC)	uc001azt.2	0	Human
dd_Smed_v4_1294	1.76466	2.09556	NA	NA	NA	NA
dd_Smed_v4_1912	1.49996	2.09512	NA	NA	NA	NA
dd_Smed_v4_3901	1.72054	2.09512	NA	NA	NA	NA
dd_Smed_v4_2508	1.19115	2.09427	NA	uc001hcg.1	1e-43	Human
dd_Smed_v4_10637	1.41173	2.09409	OTU domain containing 7B (OTUD7B)	uc001etn.3	2e-65	Human
dd_Smed_v4_12297	1.49996	2.0936	NA	uc001jnl.1	2e-08	Human
dd_Smed_v4_9430	2.02936	2.09125	cdk6-like protein	FJ588604.1	0	Smed
dd_Smed_v4_8701	2.47052	2.09117	clone sherc-1 hypothetical protein	KP954684.1	0	Smed
dd_Smed_v4_21010	1.72054	2.09046	NA	NA	NA	NA
dd_Smed_v4_5172	1.01468	2.08963	alveolar soft part sarcoma chromosome region, candidate 1 (ASPSCR1)	uc002kcx.3	6e-42	Human
dd_Smed_v4_18379	1.63231	2.0895	helicase with zinc finger 2, transcriptional coactivator (HELZ2)	uc002yfl.1	3e-36	Human
dd_Smed_v4_3579	1.41173	2.0895	NA	uc002jbc.3	0	Human
dd_Smed_v4_11041	2.07348	2.08939	block of proliferation 1 (BOP1)	uc003zbm.3	1e-84	Human
dd_Smed_v4_4249	0.749981	2.08866	chromosome 4 open reading frame 29 (C4orf29)	uc021xrt.1	1e-87	Human
dd_Smed_v4_7810	1.49996	2.08829	NA	NA	NA	NA
dd_Smed_v4_3636	1.36761	2.08653	ubiquitin-like modifier activating enzyme 1 (UBA1)	uc004dhk.4	0	Human
dd_Smed_v4_9610	1.85289	2.08617	metallophosphoesterase domain containing 1 (MPPED1)	uc011apy.2	2e-16	Human
dd_Smed_v4_5947	0.926447	2.08496	NA	uc001css.3	0	Human
dd_Smed_v4_1132	0.485282	2.0835	villin 1 (VIL1)	uc002vic.1	2e-58	Human
dd_Smed_v4_7615	1.10291	2.0823	NA	NA	NA	NA
dd_Smed_v4_4328	1.58819	2.08026	NECAP endocytosis associated 1 (NECAP1)	uc001qtx.2	1e-62	Human
dd_Smed_v4_8286	0.661748	2.08007	striatin, calmodulin binding protein 3 (STRN3)	uc001wqu.2	9e-94	Human
dd_Smed_v4_2647	1.36761	2.07848	mitochondrial ribosomal protein L18 (MRPL18)	uc003qsw.4	5e-26	Human
dd_Smed_v4_15324	2.60287	2.078	CXXC finger protein 1 (CXXC1)	uc002ler.4	3e-12	Human
dd_Smed_v4_3852	1.14703	2.07636	ADAMTS-like 3 (ADAMTSL3)	uc002bjz.4	2e-22	Human
dd_Smed_v4_3094	0.926447	2.07586	FSHD region gene 1 (FRG1)	uc003izs.3	5e-46	Human
dd_Smed_v4_1554	1.19115	2.07586	calcyphosine-like (CAPSL)	uc003jju.1	5e-72	Human
dd_Smed_v4_1820	0.88233	2.07385	cytoplasmic FMR1 interacting protein 2 (CYFIP2)	uc021ygo.1	0	Human
dd_Smed_v4_7944	1.01468	2.07303	R3H domain and coiled-coil containing 1-like (R3HCC1L)5	uc009xvy.3	4e-12	Human
dd_Smed_v4_1502	1.10291	2.07303	endoplasmic reticulum protein 29 (ERP29)	uc001ttk.1	2e-44	Human
dd_Smed_v4_6396	0.838214	2.07208	NA	uc004blh.3	5e-97	Human
dd_Smed_v4_665	0.838214	2.0716	importin 5 (IPO5)	uc001vne.3	0	Human
dd_Smed_v4_7957	2.20583	2.06978	membrane protein, palmitoylated 7 (MAGUK p55 subfamily member 7) (MPP7)	uc009xla.2	1e-96	Human
dd_Smed_v4_7917	0.573515	2.06936	ATPase, Na+/K+ transporting, beta 1 polypeptide (ATP1B1)	uc001gfr.1	1e-35	Human
dd_Smed_v4_2218	2.20583	2.06932	TAR DNA binding protein (TARDBP)	uc001art.3	1e-72	Human
dd_Smed_v4_2573	1.10291	2.06759	holocytochrome c synthase (HCCS)	uc004cuj.3	2e-84	Human
dd_Smed_v4_1641	1.41173	2.06753	LSM3 homolog, U6 small nuclear RNA associated (S. cerevisiae) (LSM3)	uc003byn.3	1e-32	Human
dd_Smed_v4_9982	1.63231	2.06752	NA	NA	NA	NA
dd_Smed_v4_9151	1.63231	2.06737	NA	uc002xmd.1	5e-15	Human
dd_Smed_v4_4450	1.98524	2.06736	atlastin GTPase 1 (ATL1)	uc001wye.4	2e-125	Human
dd_Smed_v4_4474	1.72054	2.06697	NA	NA	NA	NA
dd_Smed_v4_19608	2.07348	2.0647	NA	NA	NA	NA
dd_Smed_v4_9092	1.94113	2.06303	N(alpha)-acetyltransferase 25, NatB auxiliary subunit (NAA25)	uc009zwa.2	1e-62	Human
dd_Smed_v4_4816	1.27938	2.06303	NCK adaptor protein 2 (NCK2)	uc002tdi.3	6e-55	Human
dd_Smed_v4_9009	1.98524	2.06303	dynein, axonemal, heavy chain 3 (DNAH3)	uc010vbe.2	0	Human
dd_Smed_v4_6431	1.27938	2.06301	tousled-like kinase 1 (TLK1)	uc010zdn.1	7e-166	Human
dd_Smed_v4_2712_2	1.14703	2.0619	NA	NA	NA	NA
dd_Smed_v4_6698	1.45584	2.0619	NA	NA	NA	NA
dd_Smed_v4_8417	0.661748	2.06172	NA	NA	NA	NA
dd_Smed_v4_8606	1.3235	2.06147	strain AAA-1 PREP homeodomain-like protein (prep)	GU290186.1	0	Smed
dd_Smed_v4_7151	1.63231	2.06143	activin A receptor, type I (ACVR1)	uc010fog.2	3e-99	Human
dd_Smed_v4_16428	0.838214	2.05944	slc38a-4 (slc38a-4)	KT163713.1	0	Smed
dd_Smed_v4_12342	1.45584	2.05852	NA	uc003bxt.2	1e-12	Human
dd_Smed_v4_4763	1.27938	2.05839	ligand of numb-protein X 2 (LNX2)	uc001url.4	3e-76	Human
dd_Smed_v4_1826	1.36761	2.05735	small nuclear ribonucleoprotein D1 polypeptide 16kDa (SNRPD1)	uc002ktj.1	3e-43	Human
dd_Smed_v4_4098	1.63231	2.05732	integrator complex subunit 12 (INTS12)	uc010ilr.3	2e-09	Human
dd_Smed_v4_6888	2.20583	2.05485	WD repeat domain 11 (WDR11)	uc021pzt.1	3e-162	Human
dd_Smed_v4_9790	1.63231	2.05455	sodium channel, non-voltage-gated 1, gamma subunit (SCNN1G)	uc002dlm.1	4e-08	Human
dd_Smed_v4_13699	1.94113	2.05454	coiled-coil domain containing 102B (CCDC102B)	uc002lkj.1	4e-13	Human
dd_Smed_v4_17278	1.98524	2.05454	#N/A	#N/A	#N/A	#N/A
dd_Smed_v4_2498	0.838214	2.05354	acyl-CoA binding domain containing 3 (ACBD3)	uc001hpy.3	5e-45	Human
dd_Smed_v4_2198	1.49996	2.05288	syntaxin 5 (STX5)	uc001nvh.3	3e-56	Human
dd_Smed_v4_5862	1.98524	2.05275	Smed05893_V2 ribonucleoside diphosphate reductase subunit M2	JX010583.1	0	Smed
dd_Smed_v4_3050	1.41173	2.05265	calcium binding protein 39-like (CAB39L)	uc001vcx.3	4e-98	Human
dd_Smed_v4_960	1.76466	2.05139	thioredoxin reductase 3 (TXNRD3)	uc003ejd.2	0	Human
dd_Smed_v4_1331	0.352932	2.05117	high mobility group box 2 (HMGB2)	uc003itb.2	2e-43	Human
dd_Smed_v4_18126	1.67643	2.05117	slc38a-2 (slc38a-2)	KT163711.1	0	Smed
dd_Smed_v4_2856	1.67643	2.04974	NA	NA	NA	NA
dd_Smed_v4_10942	2.51464	2.0472	NA	NA	NA	NA
dd_Smed_v4_11432	1.67643	2.04436	chromatin licensing and DNA replication factor 1 (CDT1)	uc002flu.3	1e-08	Human
dd_Smed_v4_3392	1.19115	2.04409	uroporphyrinogen decarboxylase (UROD)	uc001cna.2	2e-140	Human
dd_Smed_v4_12651	1.27938	2.04375	dual specificity phosphatase 14 (DUSP14)	uc021tvt.1	5e-27	Human
dd_Smed_v4_3718	0.705864	2.04359	KRAB-A domain containing 2 (KRBA2)	uc002glg.1	3e-07	Human
dd_Smed_v4_3176	1.10291	2.04265	transcription elongation factor A (SII), 2 (TCEA2)	uc021wgq.1	3e-66	Human
dd_Smed_v4_7036	1.27938	2.04095	NA	NA	NA	NA
dd_Smed_v4_920	1.49996	2.03866	hypothetical protein Smed-agat-1	KY348647.1	0	Smed
dd_Smed_v4_11040	1.98524	2.03717	NA	NA	NA	NA
dd_Smed_v4_3150	1.76466	2.03639	O-sialoglycoprotein endopeptidase (OSGEP)	uc001vxf.3	3e-178	Human
dd_Smed_v4_4426	1.19115	2.03467	integrator complex subunit 3 (INTS3)	uc001fct.3	5e-67	Human
dd_Smed_v4_2101	0.794097	2.03225	NA	NA	NA	NA
dd_Smed_v4_8313	1.76466	2.03058	PRKR interacting protein 1 (IL11 inducible) (PRKRIP1)	uc011kkr.1	3e-15	Human
dd_Smed_v4_8540	1.45584	2.0304	X1.D.D8.3	KF730700.1	0	Smed
dd_Smed_v4_11457	1.49996	2.03023	NA	NA	NA	NA
dd_Smed_v4_4845	1.45584	2.02814	NA	NA	NA	NA
dd_Smed_v4_15514	1.67643	2.02763	NA	NA	NA	NA
dd_Smed_v4_10331	1.76466	2.02515	NA	NA	NA	NA
dd_Smed_v4_4339	0.661748	2.02502	NA	NA	NA	NA
dd_Smed_v4_3779	1.14703	2.0248	lin-52 homolog (C. elegans) (LIN52)	uc001xpp.2	3e-25	Human
dd_Smed_v4_3289	1.10291	2.024	mitochondrial ribosomal protein L17 (MRPL17)	uc001men.2	5e-16	Human
dd_Smed_v4_10888	1.45584	2.02342	NA	NA	NA	NA
dd_Smed_v4_22256	0.617631	2.02049	NA	NA	NA	NA
dd_Smed_v4_2533	1.3235	2.02006	diaphanous-related formin 2 (DIAPH2)56	uc004efu.4	3e-82	Human
dd_Smed_v4_10660	1.94113	2.01785	thymine-DNA glycosylase (TDG)	uc001tkg.3	1e-46	Human
dd_Smed_v4_11005	1.14703	2.01756	mitogen-activated protein kinase 8 interacting protein 3 (MAPK8IP3)	uc021tah.1	1e-17	Human
dd_Smed_v4_9208	0.573515	2.01756	ATP-binding cassette, sub-family C (CFTR/MRP), member 2 (ABCC2)	uc001kqf.2	0	Human
dd_Smed_v4_4749	1.54408	2.01736	crooked neck pre-mRNA splicing factor-like 1 (Drosophila) (CRNKL1)	uc002wrs.3	0	Human
dd_Smed_v4_5486	0.970563	2.01704	ER membrane protein complex subunit 2 (EMC2)	uc003ymw.1	6e-90	Human
dd_Smed_v4_3806	0.926447	2.01703	MON2 homolog (S. cerevisiae) (MON2)	uc009zqj.3	0	Human
dd_Smed_v4_4886	0.573515	2.01599	NA	uc002xoh.2	8e-92	Human
dd_Smed_v4_7273	1.3235	2.01435	rerg (rerg)	KJ187189.1	0	Smed
dd_Smed_v4_8889	1.36761	2.01394	cytoplasmic polyadenylation element-binding protein 2	KY847526.1	0	Smed
dd_Smed_v4_4302	1.80878	2.01355	zinc finger protein 259 (ZNF259)	uc001ppp.3	8e-107	Human
dd_Smed_v4_3660	0.970563	2.01195	serrate RNA effector molecule homolog (Arabidopsis) (SRRT)5	uc003uxa.2	3e-25	Human
dd_Smed_v4_8302	0.794097	2.01194	NA	NA	NA	NA
dd_Smed_v4_1279	0.926447	2.01175	NA	uc002omq.3	0	Human
dd_Smed_v4_12879	1.10291	2.01082	raptor	JF894290.2	1.84e-66	Smed
dd_Smed_v4_9412	1.58819	2.01071	NA	NA	NA	NA
dd_Smed_v4_18158	1.80878	2.01071	NA	NA	NA	NA
dd_Smed_v4_3195	1.89701	2.01065	NA	NA	NA	NA
dd_Smed_v4_5682	1.58819	2.01053	glutamate receptor, ionotropic, N-methyl D-aspartate 1 (GRIN1)NR1-1	uc004clm.3	4e-37	Human
dd_Smed_v4_10272	1.63231	2.00882	potassium channel tetramerisation domain containing 7 (KCTD7)	uc003tvd.4	2e-28	Human
dd_Smed_v4_3586	2.29406	2.00866	NA	uc011bzy.1	3e-70	Human
dd_Smed_v4_241	1.14703	2.00862	prosaposin (PSAP)	uc001jsm.3	2e-09	Human
dd_Smed_v4_2491	1.58819	2.0083	stress-associated endoplasmic reticulum protein family member 2 (SERP2)	uc001uzj.3	3e-18	Human
dd_Smed_v4_9614	1.3235	2.00732	family with sequence similarity 208, member A (FAM208A)	uc003did.4	3e-16	Human
dd_Smed_v4_11237	2.02936	2.00635	Vang-2	HQ141794.1	0	Smed
dd_Smed_v4_6723	0.661748	2.00633	NA	NA	NA	NA
dd_Smed_v4_12683_1	0.705864	2.00619	NA	NA	NA	NA
dd_Smed_v4_277	0.705864	2.0038	ubiquinol-cytochrome c reductase hinge protein (UQCRH)	uc001cpp.3	1e-08	Human
dd_Smed_v4_1693	0.441165	2.0038	NA	NA	NA	NA
dd_Smed_v4_10271	1.41173	2.00293	WD repeat domain 96 (WDR96)	uc001kxw.3	0	Human
dd_Smed_v4_7843	1.49996	2.00171	NA	uc003cfd.1	1e-56	Human
dd_Smed_v4_3882	1.27938	1.99908	SAC1 suppressor of actin mutations 1-like (yeast) (SACM1L)	uc003cos.2	6e-161	Human
dd_Smed_v4_15794	1.67643	1.99908	NA	uc003jno.3	3e-130	Human
dd_Smed_v4_6654	1.63231	1.99798	vacuolar protein sorting 13 homolog D (S. cerevisiae) (VPS13D)	uc001atw.3	5e-177	Human
dd_Smed_v4_10340	1.45584	1.99715	DEAH (Asp-Glu-Ala-His) box polypeptide 37 (DHX37)	uc001ugy.3	1e-91	Human
dd_Smed_v4_1224	2.16171	1.99616	aquaporin 4 (AQP4)b	uc002kvz.3	6e-28	Human
dd_Smed_v4_552	1.3235	1.99613	NA	uc001oma.3	4e-14	Human
dd_Smed_v4_1982	1.76466	1.99543	NOP58 ribonucleoprotein (NOP58)	uc002uzb.3	4e-111	Human
dd_Smed_v4_16762	2.33818	1.99508	NA	NA	NA	NA
dd_Smed_v4_1111	0.485282	1.9927	NA	NA	NA	NA
dd_Smed_v4_14396	1.27938	1.99258	NA	NA	NA	NA
dd_Smed_v4_7382	1.3235	1.99213	ligase I, DNA, ATP-dependent (LIG1)	uc010xzf.1	0	Human
dd_Smed_v4_375	0.308816	1.99186	RAB28, member RAS oncogene family (RAB28)	uc003gmu.2	5e-57	Human
dd_Smed_v4_2226	0.926447	1.99067	eukaryotic elongation factor-2 kinase (EEF2K)	uc002dki.3	3e-27	Human
dd_Smed_v4_4043	2.64699	1.99043	exocyst complex component 8 (EXOC8)	uc001huq.3	1e-36	Human
dd_Smed_v4_606	1.80878	1.99043	N-acetylgalactosaminidase, alpha- (NAGA)	uc003bbw.4	2e-110	Human
dd_Smed_v4_4668	2.82346	1.98898	glucosidase, alpha; acid (GAA)	uc002jxq.3	0	Human
dd_Smed_v4_3566	1.01468	1.9888	Leo1, Paf1/RNA polymerase II complex component, homolog (S. cerevisiae) (LEO1)	uc002abo.3	1e-79	Human
dd_Smed_v4_3529	1.0588	1.9888	adaptor-related protein complex 2, sigma 1 subunit (AP2S1)AP17	uc002pft.1	2e-88	Human
dd_Smed_v4_11823	0.617631	1.9888	frizzled-5/8-4 (fz5/8-4)	KT983962.1	0	Smed
dd_Smed_v4_660	0.397049	1.98753	calmodulin 1 (phosphorylase kinase, delta) (CALM1)	uc010atq.2	1e-18	Human
dd_Smed_v4_1278	0.970563	1.98726	proteasome (prosome, macropain) subunit, alpha type, 1 (PSMA1)	uc001mlk.3	6e-114	Human
dd_Smed_v4_2357	0.838214	1.98612	NA	NA	NA	NA
dd_Smed_v4_1262	1.80878	1.98556	importin 5 (IPO5)	uc001vne.3	0	Human
dd_Smed_v4_3548	1.58819	1.98426	NA	uc001fcr.3	5e-110	Human
dd_Smed_v4_10459_1	2.38229	1.98426	chromodomain helicase DNA binding protein 1 (CHD1)	uc003knf.3	0	Human
dd_Smed_v4_4267	0.573515	1.98426	glutamate receptor, ionotropic, kainate 3 (GRIK3)	uc001caz.2	2e-146	Human
dd_Smed_v4_8579	0.794097	1.98324	neuropilin (NRP) and tolloid (TLL)-like 2 (NETO2)	uc002eer.2	5e-19	Human
dd_Smed_v4_5672_1	0.838214	1.98249	NA	NA	NA	NA
dd_Smed_v4_713	0.617631	1.98196	NA	NA	NA	NA
dd_Smed_v4_6947	1.72054	1.98157	TruB pseudouridine (psi) synthase homolog 2 (E. coli) (TRUB2)	uc004buq.1	9e-21	Human
dd_Smed_v4_15123	1.58819	1.98104	karyopherin alpha 3 (importin alpha 4) (KPNA3)	uc001vdj.2	2e-13	Human
dd_Smed_v4_6241	1.49996	1.98048	isoamyl acetate-hydrolyzing esterase 1 homolog (S. cerevisiae) (IAH1)	uc002qzr.3	8e-52	Human
dd_Smed_v4_8808	1.23526	1.98034	NA	NA	NA	NA
dd_Smed_v4_3359	1.19115	1.98034	lissencephaly-1 (lis1)	JQ650355.1	0	Smed
dd_Smed_v4_137	2.11759	1.98034	dynein, light chain, LC8-type 2 (DYNLL2)	uc010wnn.1	6e-09	Human
dd_Smed_v4_10225	2.33818	1.97928	not7b	KF781125.1	0	Smed
dd_Smed_v4_6315	1.3235	1.97654	casein kinase 2, alpha 1 polypeptide (CSNK2A1)	uc002wdx.1	0	Human
dd_Smed_v4_361	1.3235	1.97617	NA	NA	NA	NA
dd_Smed_v4_1361	0.970563	1.97583	clathrin, light chain A (CLTA)	uc003zze.3	4e-16	Human
dd_Smed_v4_9936	2.33818	1.97476	ankyrin repeat domain 29 (ANKRD29)	uc002kun.3	3e-54	Human
dd_Smed_v4_1404	1.76466	1.97215	ciliary rootlet coiled-coil, rootletin (CROCC)	uc001azt.2	0	Human
dd_Smed_v4_4599	1.89701	1.97207	NA	NA	NA	NA
dd_Smed_v4_4442	0.970563	1.97084	mitochondrial ribosomal protein S6 (MRPS6)	uc002ytp.2	2e-13	Human
dd_Smed_v4_2882	1.76466	1.97061	NA	uc003ypl.2	8e-100	Human
dd_Smed_v4_1373_1	0.705864	1.9689	NA	uc003cfx.3	3e-167	Human
dd_Smed_v4_7797	1.80878	1.96863	DEAD (Asp-Glu-Ala-Asp) box polypeptide 55 (DDX55)	uc001ufk.3	1e-99	Human
dd_Smed_v4_2212	1.0588	1.96777	NA	NA	NA	NA
dd_Smed_v4_1564	1.89701	1.96654	ubiquitin-like 5 (UBL5)	uc002mmj.1	1e-40	Human
dd_Smed_v4_7162	1.80878	1.96624	YTH domain family, member 1 (YTHDF1)	uc011aaq.2	2e-57	Human
dd_Smed_v4_3012	0.926447	1.96621	Smed13647_V2 thyroid hormone receptor-1	JX010606.1	0	Smed
dd_Smed_v4_7403	1.10291	1.96451	nuclear factor I/B (NFIB)	uc003zle.3	1e-14	Human
dd_Smed_v4_2783	1.94113	1.9615	hemicentin 1 (HMCN1)	uc001grq.1	7e-32	Human
dd_Smed_v4_2666	1.49996	1.96053	NA	NA	NA	NA
dd_Smed_v4_19327	-4.2793	-0.0810441	NK1 homeobox 2 (NKX1-2)	uc010quf.2	3e-34	Human
dd_Smed_v4_12634	0.264699	0.285743	MyoD-like protein	AF414355.1	0	Smed

## Sheet: SF1F
Supplementary file 1F. Primers used to clone nr4A and its target genes, and qPCR primers.
Gene	Forward primer			Reverse primer
nr4A	CGCGAGTCAGTCAGCCAT			TGCCGTGGCTGGATGAAG
dd_9565 (col21a1)	TGGTGACAAATGAATGCTCACT			ACCAGGATCACCTTGGGGA
dd_3902 (mmp19)	TGCGATAGAATTTTTAGGGGCA			CTTGGGTTGTGCTGGGGT
dd_2972	CAACAACAGAAGAACAAACAACC			CAGTATTTCGTACGCTCTTTGCA
dd_11683 (ca12)	TGGATTACTGATCTTCGCTTTTG			TCTTCAGCAGTCATCAAACTAGA
dd_508	CAGGAAGAAATACTCGTGCATCA			ACCAGTGCACGAAGGCTC
dd_950 (vim)	TGCGTTGGAGTAAATAGAAAGCA			TGTTCAAGGGTGATATGCGCT
dd_9677 (pcdh11y)	TTCTGCTGACAAAACCTCTCGA			AGCTCATGACGCCCGAAG
dd_1706 (psapl1)	TGCGTGACTTTCTTCAAAGGA			GTGATCCGGTGCTGGCTT
dd_2736 (hspb1)	TGTGTAGTCACCTGTCTAGAGT			AGTGAGTTCAATGGATCATGCA
dd_11601 (qki)	CAATCTTTCACAAATCGTGTCCA			CAACGCAGAGTTCAAACAATGC
nr4A_qPCR	GATGGTCAATTTTAAATCAATCAACAA			GGTCCACAGCAATGAGTTTTAAGC
gapdh_qPCR	CTATCCCAAACTAAAGCTTTCGAAG			TTGCATGGTACGACAATGAATATGG

## Sheet: SF1G
Supplementary file 1G. Nuclear receptor proteins and their accession numbers used in phylogenetic analysis.
NP_001027658.1_THR_Ciona intestinalis
NP_001027658.1_THR_Ciona intestinalis
NP_001071673.1_COUPTF_Ciona intestinalis
NP_001071700.1_ERR2_Ciona intestinalis
NP_001071721.1_NR5_Ciona intestinalis
NP_001071735.1_HNF4b_Ciona intestinalis
NP_001071779.1_NR4_Ciona intestinalis
NP_001071801.1_PPAR_Ciona intestinalis
NP_001071806.1_RAR_Ciona intestinalis
NP_001071809.1_RXR_Ciona intestinalis
NP_001071847.1_VD3R_Ciona intestinalis
NP_001071940.1_NR6A1_Ciona intestinalis
NP_001071962.1_NR1D_Ciona intestinalis
NP_001072021.1_RORb_Ciona intestinalis
NP_001072044.1_NR2C_Ciona intestinalis
NP_001087206.1_NR1H4_Ciona intestinalis
NP_571415.1_THRb_Danio rerio
NP_570994.1_VD3Ra_Danio rerio
NP_694491.1_ER_Danio rerio
NP_991109.1_HNF4b_Danio rerio
NP_998119.1_ERRg_Danio rerio
NP_001002173.1_NR4A1_Danio rerio
NP_956886.1_NR2F1b_Danio rerio
NP_001003608.1_NR2E1_Danio rerio
NP_571481.2_RARa.a_Danio rerio
NP_001018458.1_NR2C1_Danio rerio
NP_571331.2_NR6A1a_Danio rerio
NP_001076416.1_NR0B1_Danio rerio
NP_001093873.1_MR_Danio rerio
NP_001103637.1_RORa_Danio rerio
NP_001154805.1_PPARa_Danio rerio
NP_001155023.1_RXRa.a_Danio rerio
NP_991292.2_NR1D1_Danio rerio
NP_001300658.1_NR5A2_Danio rerio
NP_001017545.2_LXRa_Danio rerio
AGB95004.1_Hr4.E_Drosophila melanogaster
AAF51629.2_knirpsA_Drosophila melanogaster
NP_476781.1_ULTRASPIRACLEa_Drosophila melanogaster
NP_524596.1_TAILLESS_Drosophila melanogaster
AAN13541.1_seven_upA_Drosophila melanogaster
NP_476887.2_HNF4A_Drosophila melanogaster
NP_724456.1_ecdysone_receptorA_Drosophila melanogaster
NP_729340.1_ERRa_Drosophila melanogaster
NP_524133.2_Ecdysone_induced_protein_75B_Drosophila melanogaster
NP_524195.2_Ecdysone_induced_protein_78C_Drosophila melanogaster
AAA28464.1_DHR39_Drosophila melanogaster
AAA28542.1_FTZ.F1_Drosophila melanogaster
CAA61534.1_DHR38_Drosophila melanogaster
AAC46927.1_DHR78_Drosophila melanogaster
AAC46928.1_DHR96_Drosophila melanogaster
hofstenia_98054688_Hofstenia miamia
hofstenia_98053361_Hofstenia miamia
hofstenia_98045931_Hofstenia miamia
hofstenia_98016829_Hofstenia miamia
hofstenia_98004832_Hofstenia miamia
hofstenia_98053733_Hofstenia miamia
hofstenia_98007166_Hofstenia miamia
hofstenia_98037572_Hofstenia miamia
hofstenia_98001007_Hofstenia miamia
hofstenia_98039698_Hofstenia miamia
hofstenia_98047801_Hofstenia miamia
hofstenia_98042547_Hofstenia miamia
NP_002948.1_RXRa_Homo sapiens
NP_003260.1_NR2E1b_Homo sapiens
NP_000466.2_NR0B1_Homo sapiens
NP_005645.1_COUPTF1_Homo sapiens
NP_005027.2_PPARa_Homo sapiens
NP_068370.1_NR1D1_Homo sapiens
NP_000956.2_RARb1_Homo sapiens
NP_004442.3_ERR1.1_Homo sapiens
NP_599023.1_RORa.a_Homo sapiens
NP_004950.2_steroidogenic_factor_1_Homo sapiens
NP_003241.2_THRa2_Homo sapiens
NP_775180.1_NR4A1.1_Homo sapiens
NP_201591.2_NR6A1.1_Homo sapiens
NP_001116214.1_ER1_Homo sapiens
NP_003288.2_NR2C1a_Homo sapiens
NP_005684.2_LXRa1_Homo sapiens
NP_001017536.1_VD3Rb1_Homo sapiens
NP_001191188.1_GRa.c1_Homo sapiens
NP_001245284.1_HNF4a4_Homo sapiens
RNA1509_34082_NR4A3_Macrostomum lignano
RNA1509_9759_RXRb_Macrostomum lignano
RNA1509_27629_THRa_Macrostomum lignano
RNA1509_26996_NR6A1_Macrostomum lignano
RNA1509_32023_HNF4G_Macrostomum lignano
RNA1509_51319_NR1D2_Macrostomum lignano
RNA1509_26020_NR2C2_Macrostomum lignano
RNA1509_50302_NR5A1_Macrostomum lignano
RNA1509_39776_NR2E1_Macrostomum lignano
NP_031456.1_NR0B1_Mus musculus
NP_031982.1_ER1_Mus musculus
NP_034574.1_NR4A1_Mus musculus
NP_035435.1_RXRa1_Mus musculus
NP_038674.1_RORa1_Mus musculus
NP_620639.1_steroidogenic_factor_1_Mus musculus
NP_689415.1_NR2E1_Mus musculus
NP_835161.1_THRa2_Mus musculus
NP_035274.2_PPARa_Mus musculus
NP_033530.2_VD3R_Mus musculus
NP_032287.2_HNF4a2_Mus musculus
NP_663409.2_NR1D1_Mus musculus
NP_034281.2_COUPTF1_Mus musculus
NP_031979.2_ERR1_Mus musculus
NP_033050.2_RARa1_Mus musculus
NP_032199.3_GR_Mus musculus
NP_035759.3_NR2C1_Mus musculus
NP_001153020.1_NR6A1.2_Mus musculus
NP_001171201.1_LXRa_Mus musculus
XP_001624292.1_partial_NR6_Nematostella vectensis
XP_001630385.1_NR2E_Nematostella vectensis
XP_001631058.1_NR2CorD_Nematostella vectensis
XP_001634340.1_COUPTF_Nematostella vectensis
XP_001638550.1_partial_HNF4_Nematostella vectensis
(dd_smedv4.1_12229_Schmidtea mediterranea)
